# Supplementary material for: Mouse TRPA1 function and membrane localization are modulated by direct interactions with cholesterol
Source: eLife. 2019 Jun 11;8:e46084. doi: 10.7554/eLife.46084 (PMC6590989; doi:10.7554/eLife.46084)
Supplement: Figure 1—figure supplement 1—source data 1. [file elife-46084-fig1-figsupp1-data1.xlsx]

## Sheet: Figure 1S1B
	mTRPA1/IRES/GFP								mTRPA1/IRES/GFP					mTRPA1-mCherry										mTRPA1-mCherry
	Response Amplitudes (Baseline substracted)								AITC Concentration (µM)	Mean Response Amplitude	SEM			Response Amplitudes (Baseline substracted)										AITC Concentration (µM)	Mean Response Amplitude	SEM
AITC Concentration (µM)	0.5	5	10	30	100	300	800		0.5	0.02476	0.01259		AITC Concentration (µM)	0.1	0.5	1	5	10	50	100	300	800		0.1	0.000418812	0.00375
	0.10101	-0.03064	0.05201	0.22075	1.95433	1.46244	0.80417		5	0.34431	0.05173			-0.02851	-0.00517	-0.000636667	0.4509	0.4509	0.17605	0.58833	0.82298	0.4615		0.5	0.0045	0.00216
	-0.01787	-0.4617	1.13627	0.28643	0.59302	0.72057	0.05004		10	0.49077	0.05198			0.02815	0.01187	0.01071	0.37034	0.37034	0.20665	2.05872	1.73439	0.90381		1	0.09296	0.01796
	-0.00803	0.04561	0.3058	0.70327	1.20955	0.65481	0.58114		30	0.65894	0.05839			0.03879	0.00666	-0.00467	0.39714	0.39714	0.02174	1.58107	0.9321	2.04776		5	0.26063	0.02204
	-0.14334	0.88369	0.06886	0.15177	0.87783	1.26431	0.60464		100	0.80441	0.11103			0.00727	0.01115	-0.00432	0.28491	0.28491	1.56522	0.65977	0.29772	1.27233		10	0.40636	0.03273
	-0.08461	-0.28528	0.21225	0.85507	0.56976	0.01754	0.48971		300	0.94183	0.06588			-0.000123333	0.05747	-0.01163	0.02662	0.02662	0.77416	0.63939	1.68703	1.24344		50	0.55556	0.03593
	-0.08312	-0.03241	0.39667	0.18699	0.49348	1.27273	2.72778		800	0.86293	0.12148			0.03311	-0.000926667	0.02703	0.09316	0.09316	1.49947	2.87856	0.32769	1.9471		100	0.69738	0.04691
	-0.01841	-0.01964	0.1048	0.71397	0.57539	0.77771	2.52238							0.02865	0.00866	0.000776667	0.26112	0.26112	0.89785	2.21553	0.58311	0.05122		300	0.75479	0.06188
	0.0244	0.022	0.60183	1.01703	1.49205	1.55231	1.18054							-0.09656	0.06386	-0.00934	0.40919	0.40919	0.02189	0.06846	0.67748	1.60574		800	0.77352	0.06069
	-0.1002	0.85806	0.20748	0.31115	1.23548	1.7195	2.52143		Fit					0.00211	-0.05354	-0.00255	0.75998	0.60283	0.07573	0.17589	3.10836	0.76757
	0.07681	0.30344	0.58424	0.49487	0.73948	0.56188	0.90775		Model	Hill				0.01262	0.00965	0.00896	0.60283	0.01125	-0.01373	0.65358	1.48006	0.62304
	0.00438	0.38259	0.58609	0.18985	2.4762	1.7909	0.50299		Equation	y=Vmax*x^n/(k^n+x^n)				0.02566	0.01037	-0.00713	0.01125	0.0726	0.31288	0.55792	3.12277	2.7421		Fit
	-0.00276	-0.02271	0.48781	0.60542	2.03709	0.16679	0.89361		Reduced Chi-Sqr	0.67918				-0.06116	0.01997	-0.01615	0.0726	0.00784	1.43829	2.25685	1.03493	0.34378		Model	Hill
	-0.03842	-0.00631	0.59362	1.49849	1.15781	1.04079	0.50884		Adj. R-Square	0.99076				0.00878	-0.00383	-0.02653	0.00784	0.74308	1.43908	1.78556	1.47717	2.14842		Equation	y=Vmax*x^n/(k^n+x^n)
	-0.02096	0.4178	0.30943	0.3104	0.15454	0.58367	1.11956			Value	Standard Error			-0.02487	-0.04067	-0.01456	0.74308	0.13086	0.91405	-0.00698	0.08642	0.83334		Reduced Chi-Sqr	0.00123
	-0.00195	0.00696	0.2197	0.38813	1.92938	1.7244	2.51836		Vmax	0.90113	0.04725			0.01909	0.00896	-0.00566	0.13086	0.02469	0.41224	2.22897	1.60316	0.41104		Adj. R-Square	0.99084
	0.04006	-0.04875	0.2673	1.05455	0.8917	0.73992	1.43232		k	9.13532	1.51703			0.0291	-0.02922	-0.01974	0.02469	0.06892	0.15888	0.24046	-0.0485	0.21695			Value	Standard Error
	0.28559	0.02669	0.55387	0.55148	0.01064	0.73936	0.87497		n	1.13857	0.1206			0.00829	-0.05583	-0.00496	0.06892	0.12617	0.17408	1.29618	1.1228	1.86692		Vmax	0.79296	0.03764
	0.28224	0.16444	0.52105	1.47313	0.99533	1.95837	1.08478							0.04179	-0.09872	0.03202	0.12617	0.25732	0.91075	0.94696	1.47389	0.00797		k	11.8142	2.49197
	0.17545	0.06618	0.74266	0.57301	2.63078	1.29293	0.60387							-0.00438	0.01732	0.03095	0.25732	0.36567	1.15247	0.07151	0.15115	1.87622		n	0.84085	0.11561
	-0.01367	-0.11924	0.30132	0.37388	0.78728	0.42556	0.54877							0.0051	-0.01043	0.0073	0.36567	0.56619	1.3318	2.01304	0.7928	0.03908
	-0.05349	0.96189	0.35616	0.11648	-0.01966	1.82647	0.62467							-0.03994	0.02893	-0.01511	0.56619	0.53147	2.04952	1.58782	0.17738	1.8714
	0.09385	0.10967	0.4207	0.42325	3.53699	1.03377	2.33773							0.02444	0.000423333	-0.00266	0.53147	0.09375	0.14659	0.05835	0.81236	1.60139
	0.14351	-0.26631	1.05257	0.17698	2.17943	0.80467	0.39143							0.01732	-0.0051	-0.01748	0.09375	0.20416	0.45675	0.18317	0.2111	1.5811
	-0.00944	0.31348	0.34018	0.16027	-0.0147	1.46795	1.28464							0.03856	0.00079	-0.01272	0.20416	0.23931	1.66888	0.17181	0.22141	0.45753
	-0.03761	0.17233	0.768	0.9419	1.02242	1.82091	0.5582							0.00505	0.00273	-0.02412	0.23931	0.16529	0.12861	2.19149	1.59014	0.42216
	0.0298	0.01516	0.18949	0.90569	-0.02222	1.36152	0.51491							0.02524	-0.03329	0.00972	0.16529	1.75473	1.91161	2.37409	0.43037	0.01682
	0.09396	0.21074	1.551	0.64421	-0.01777	0.36992	0.08763							-0.00315	0.00396	0.01027	0.52431	0.52431	0.24367	0.27161	1.56526	0.23388
	-0.0296	0.75404	0.7143	1.90655	1.12975	1.75037	0.10937							0.01502	0.00768	-0.00149	0.68403	0.68403	0.02827	0.000273333	1.0967	0.30961
	-0.04867	0.12494	0.55311	0.77535	0.57737	0.74671	0.01127							0.01424	-0.0014	-0.00448	0.30367	0.30367	1.44793	0.33196	0.84121	0.66015
	0.19055	0.04431	0.77998	0.72331	0.66626	1.92239	0.58574							-0.00342	-0.00046	-0.02892	0.58224	0.58224	0.18948	1.29483	0.56859	0.99362
	-0.01711	-0.06505	0.70539	0.25711	-0.01395	0.40828	0.96852							0.03445	-0.0029	0.00965	0.00318	0.00318	0.35321	2.15979	-0.000293333	1.17247
	0.10118	0.18596	0.12952	1.4501	1.35284	0.65351	1.11298							0.01457	-0.02224	-0.00229	0.70939	0.70939	0.98672	2.81329	1.45566	0.30689
	0.27624	0.13565	0.14824	0.19659	1.41244	1.198	0.12183							0.0013	0.00284	0.00112	1.13156	1.13156	1.71106	2.51809	0.03537	1.33821
	-0.07954	0.0664	1.24436	0.24964	-0.00716	1.40163	2.09626							0.01908	0.01106	0.00696	0.83886	0.83886	0.00551	0.8051	1.0436	0.73401
	0.14213	0.01793	0.61034	0.11723	0.81197	1.88664	1.19398							0.02016	-0.00213	-0.01578	0.08784	0.08784	1.32935	2.1529	1.9717	1.59057
	-0.06954	0.20473	0.03599	1.1125	0.69375	0.68215	0.19048							0.01009	0.05309	-0.00811	0.02303	0.02303	1.0564	1.03735	1.48859	0.21174
	-0.01978	0.01171	1.13861	0.4195	0.18313	0.59165	2.72262							0.00842	0.00317	0.01212	-0.00699	-0.00699	2.14929	0.19326	0.37953	0.07988
	0.06455	0.65303	0.74377	0.19762	0.35802	0.66035	0.35902							0.01243	-0.02147	-0.02625	0.04801	0.04801	1.12452	2.0118	0.09381	0.08846
	0.07745	0.08843	0.50139	1.49888	1.72764	0.52723	0.08526							0.02038	0.00123	0.00435	-0.00211	-0.00211	0.92746	1.85551	1.08153	0.37618
	-0.00352	0.25196	0.11574	1.69048	0.75938	0.62414	0.35414							0.00419	0.000743333	-0.00739	0.62036	0.62036	0.41371	1.55028	0.17697	1.41154
	0.01251	0.22005	0.63305	1.09204	0.50949	0.72673	0.12755							0.01569	-0.03883	-0.02694	0.76914	0.76914	1.41427	0.38299	0.03393	1.35338
	0.05684	0.57194	2.24205	1.31498	-0.01697	0.61452	0.05577							0.00757	-0.01005	0.2698	0.4166	0.4166	0.58832	1.61455	0.03397	0.05134
	0.06866	-0.12564	0.18679	1.90527	0.67894	0.76476	2.66954							0.00887	0.00163	0.15039	0.63987	0.63987	1.67212	0.70862	0.64363	0.65054
	0.03195	0.71651	0.89456	1.04505	2.0023	0.22127	0.09633							0.00183	0.00148	0.68604	0.86042	0.86042	0.00602	0.6993	0.1064	1.24767
	0.28028	0.98072	0.50961	0.88381	0.10561	0.90759	0.05309							0.00479	-0.00948	0.13802	0.56923	1.11414	0.25734	-0.00329	0.13847	1.06054
	-0.0875	1.24315	0.08126	0.74338	0.15165	0.91722	0.07908							-0.00761	-0.00918	0.12892	0.5892	0.56923	0.51497	1.2251	0.65044	1.66479
	0.0095	-0.04195	0.36792	0.40057	0.05351	1.61338	0.05247							0.00517	0.00282	0.07663	0.02532	0.5892	0.02891	0.21746	3.06051	0.3139
	-0.04375	-0.00929	0.27527	0.26784	0.06171	0.7214	0.09843							-0.0036	-0.00717	0.26544	0.9131	0.02532	0.17455	-0.00354	1.86349	0.53836
	0.28028	-0.061	0.05804	0.36911	0.15357	0.4911								0.01022	0.03617	0.01741	0.00322	0.9131	0.04779	0.13729	1.49608	0.23165
	0.02889	0.12876	0.19724	0.70526	0.18299	0.64225								0.01903	-0.02207	0.12636	1.15484	0.00322	0.03405	0.73687	1.21474	0.90704
	0.03866	-0.06084	0.12326	0.48791	0.13412	0.96528								-0.04747	-0.00315	0.53578	0.13944	1.15484	0.07376	1.55494	1.60866	1.2415
	-0.02115	0.10871	0.11515	1.49758	0.07649	1.98501								0.06272	-0.0012	0.03216	0.00817	0.13944	0.79592	1.85726	0.56126	1.02166
	-0.0454	-0.02636	1.08727	0.33795	0.06916	1.43954								0.04043	0.02314	0.04434	0.16506	0.00817	1.13954	2.09693	1.98505	0.07628
	-0.03715	0.5435	0.5996	0.6263	0.14845	1.25056								0.02588	0.00682	0.45023	-0.01893	0.16506	0.83483	1.95067	0.59807	0.85614
	0.10137	-0.00649	0.11488	0.99242	--	1.38641								0.00102	0.00475	0.28165	0.32105	-0.01893	0.00701	1.37958	0.70187	0.91048
	0.0743	0.00516	0.54427	0.64543	--	1.38718								0.00665	0.00345	0.28987	0.10888	0.32105	0.25083	0.85719	0.3468	0.34596
	-0.09075	0.36575	0.3706	0.2221	--	1.60538								0.0054	0.02943	0.52525	0.26099	0.10888	0.88258	0.24836	0.23816	0.00704
	-0.03481	0.27671	0.51385	0.11025	--	0.59247								0.02176	0.02799	0.43352	0.17622	0.26099	0.39061	0.0432	0.08792	-0.01747
	-0.10305	0.1127	0.46374	0.95742	--	0.34018								0.01574	0.02096	1.45409	0.35441	0.17622	0.62374	0.00184	0.09174	0.64064
	-0.01695	0.13082	0.0705	0.35898	--	1.92121								1.66667e-05	0.02643	0.12347	0.45413	0.35441	0.4603	0.60155	0.55039	0.80357
	0.20157	-0.06419	0.13615	0.12015	--	0.76764								-0.0254	0.00671	0.09407	0.33657	0.45413	0.93808	0.54737	0.66067	0.34191
	0.13931	-0.00951		0.39419	--	1.79974								-0.01701	0.01109	1.05871	0.32846	0.33657	0.38563	0.68813	1.37486	0.08586
	-0.26669	-0.10209		0.32641	--	1.34665								-0.02986	0.00735	0.65325	0.01472	0.32846	0.0662	0.5287	0.21996	0.91462
	-0.09572	0.37478		0.10711	--	2.80704								-0.04623	0.02392	0.55162	0.09277	0.01472	0.00692	1.06827	0.50787	0.59734
	0.00529	0.71476		0.43636		0.11886								-0.04179	-1e-05	1.00849	0.05224	0.09277	1.52912	0.57332	1.05088	1.64598
	0.0782	1.28898		0.08615		0.14986								-0.01401	-0.01884	0.44156	0.03596	0.05224	1.22063	1.45945	0.77059	1.0875
	0.08844	1.03826		1.6432		0.85325								0.00958	0.00508	0.41432	0.11173	0.03596	-0.00265	0.0895	0.51967	0.77037
	-0.06258	1.20876		1.87915		0.43093								-0.000973333	0.00269	0.3239	0.04208	0.11173	0.95974	0.11415	1.61784	0.36014
	-0.03415	-0.05217		0.34646		1.48488								0.01891	0.03293	0.39727	0.78706	0.04208	0.08663	0.96349	0.07336	0.20103
	-0.00881	0.23412		0.34326		0.31169								-0.00653	-0.000763333	0.38693	0.3928	0.78706	0.20751	0.6156	0.95192	1.37347
	0.01634	1.28206		0.37087		0.87656								-0.05623	0.0017	0.23327	0.46544	0.3928	0.56514	-0.01321	1.07265	1.35026
	-0.08256	0.65484		0.20252		2.25424								-0.0153	0.0032	0.23392	-0.01517	0.46544	0.82895	0.04333	0.00552	0.95825
		0.17841		0.95973		0.32473								-0.00926	0.01686	0.10743	-0.00223	0.000816667	0.35476	0.66127	0.71392	0.34857
		0.13147				1.65702								-0.17441	0.00031	0.06455	0.66146	0.03131	0.53172	0.67133	0.89814	0.75056
		0.39491				1.33731								-0.00172	0.00202	0.0584	1.99262	0.32016	0.3551	2.00707	0.03619	0.14847
		1.82418				1.90098								-0.0275	0.00851	0.19341	0.02189	0.45756	0.57525	0.05516	1.74531	0.3245
		1.21107				0.64745								0.10079	0.03925	0.27024	0.06943	0.60375	0.07091	1.11112	1.44449	0.63507
		0.26042				0.12172								-0.000506667	0.000856667	0.35815	0.05536	0.50492	-0.01014	0.20046	0.15822	2.15186
		1.69155				0.18157								-0.00507	0.02238	0.07958	0.17965	1.56941	0.31626	0.09318	1.22127	1.52226
		2.22674				0.20876								-0.06369	0.00719	0.12278	-0.03448	1.25914	0.13343	0.72185	0.16907	0.08359
		1.03588				0.11951								0.0069	0.01043	0.08112	-0.000576667	1.72646	0.10314	2.11787	-0.00871	0.48254
		0.90395				0.0724								-0.01323	0.02547	0.06976	0.0706	0.17101	0.86438	1.91224	0.75225	0.16681
		0.46816				0.12464								-0.0052	0.0253	0.35558	0.27868	0.07456	0.07586	0.14286	0.00703	0.30439
		0.22908				0.41663								0.02281	0.00558	0.05571	-0.00288	0.11166	0.44885	0.03876	0.30344	1.01532
		0.57551				0.20674								0.05441	0.02974	0.21707	0.02088	0.05178	0.24232	0.43282	0.4954	2.22078
		0.08478				0.50393								-0.00378	0.02017	0.07113	0.02309	0.37051	0.5414	1.8852	0.03618	1.35823
		0.8832				0.10189								0.01791	0.0153	0.04261	0.05325	0.95094	0.31677	0.12298	0.42821	0.39836
		0.09595				0.33917								-0.00953	0.013	0.00649	0.3286	0.31236	0.95521	0.2496	1.25768	0.64384
		0.04238				0.20105								0.09788	0.01294	0.00105	0.08325	0.07602	0.67677	0.91503	0.2314	0.5012
		0.52712				0.39989								-0.09228	0.00614	0.00116	-0.00707	0.36874	1.18801	0.36824	0.26116	0.68653
		0.7842												0.02698	0.03642	0.00731	0.02141	0.18991	1.26947	0.10254	0.33442	0.50841
		--												-0.11482	0.00783	-0.04234	0.00519	0.3399	0.63334	-0.00141	1.69663	0.64099
		--												0.00034	0.00271	0.02911	0.19757	0.3234	1.4243	0.02163	0.25261	0.85504
		--												-0.04748	0.02886	-0.01026	0.85369	-0.00126	0.48503	1.98665	0.74344	0.14948
		--												0.01991	0.00123	0.00462	0.02884	0.82306	0.14715	-0.000235484	0.27542	0.55615
		--												0.01305	0.01706	-0.00367	-0.00263	-0.03164	0.59961	0.95301	0.51544	-0.01925
		--												0.06015	0.00239	-0.00086	0.17151	0.12108	0.23923	-0.01177	0.76774	0.41665
		--												-0.01989	-0.01961	0.00608	0.19001	0.13958	-0.00017	0.06301	0.08917	0.11292
														0.00516	-0.000406667	0.01304	-0.0441	0.18248	-0.02223	0.08646	1.83709	0.52043
														-0.0407	0.00187	0.00228	-0.00967	0.33183	0.0451	0.17024	0.64268	1.32397
														-0.03552	0.00225	-0.11397	0.6319	0.29024	0.1828	0.80962	0.60268	0.36017
															0.00985	-0.00758	-0.04278	0.02015	0.15795	0.38172	0.0459	0.13563
															-0.00239	-0.02084	0.02666	-0.00914	0.28701	0.01815	1.20264	0.13248
																-0.02441	0.86201	0.03589	0.32157	-0.04107	0.56013	0.12951
																-0.04368	0.01202	-0.06637	0.11157	0.43912	0.84004	1.19545
																-0.01801	0.0542	-0.03383	0.88264	0.87472	0.90332
																-0.02743	0.01605	0.08838	0.24952	-0.00237	0.63868
																-0.01428	0.0423	0.32641	0.12776	0.7343	0.96317
																-0.0033	0.03377	0.41686	0.09275	0.81833	0.0742
																-0.02106	0.53085	0.13533	1.04248	0.24137	0.89272
																-0.02777	0.00446	0.2762	1.7113	1.35058	0.0957
																0.0184	-0.01552	0.05137	0.38103	0.03499	0.0284
																0.11357	0.53016	0.36161	0.61719	0.49885	0.11117
																0.00202	0.04999	0.00432	0.96912	0.47165	0.0634
																-0.0068	0.37622	0.01336	0.06448	1.31082	0.51055
																-0.02021	0.92808	0.90305	0.09535	0.10635	0.65015
																0.000956667	0.35636	0.16889	1.49415	0.01469	0.14104
																-0.04831	0.55234	0.71258	1.10535	0.69213	0.89051
																-0.032	-0.01401	0.22858	1.52465	0.08821
																-0.00232	0.56084	-0.05212	0.40466	0.34925
																0.00586	0.21825	-0.01197	-0.00673	0.73225
																-0.17449	-0.01393	0.00386	0.04897	0.96993
																0.04172	0.28666	0.02728	1.19629	0.01387
																0.14794	1.36184	0.64102	1.24628	0.29042
																-0.10896	0.29931	1.06879	2.00384	0.3911
																0.07502	0.12257	0.28173	0.20545	0.24809
																-0.11123	0.36342	0.08634	2.44124	0.33845
																0.08623	0.1948	0.02164	1.68872	0.08926
																0.02739	0.04611	0.16634	1.58158	1.44531
																-0.00524	0.12599	-0.04282	0.17709	2.01272
																-0.00143	0.11452	0.88108	-0.00534	1.23279
																0.02417	0.24689	0.54205	0.58871	0.59738
																-0.03536	0.01495	0.21339	1.11027	0.41674
																-0.081	0.18143	0.16113	0.66619	1.23892
																-0.00662	0.0971	0.83494	2.00069	1.68207
																0.03855	0.06982	0.72473	0.21277	0.41038
																0.12276	-0.01475	1.54036	-0.01537	0.72461
																0.20438	0.49058	0.18953	-0.01288	1.46206
																0.00609	0.10265	-0.01342	-0.01362	0.18033
																0.01912	0.32366	0.56612	-0.01853	1.20275
																0.04068	0.04712	0.00545	0.01894	0.06308
																-0.01842	0.06967	0.7493	0.08402	-0.03576
																0.03563	0.0133	0.04015	0.58798	2.00835
																-0.02215	0.16499	0.34662	0.12777	0.19868
																-0.01519	0.23105	0.9867	0.11777	0.61773
																-0.01141	-0.000853333	0.64713	0.10919	0.11761
																0.04834	0.30925	-0.02212	0.12931	0.9266
																-0.02242	0.13972	-0.02153	0.29658	0.26443
																-0.000749211	0.26833	0.18693	0.1201	1.52208
																	0.19172	0.76342	0.53261	1.48538
																	0.05996	-0.00526	0.78667	-0.02302
																	0.19084	0.3401	0.70236	-0.000406452
																	1.45834	0.11744	0.5733	-0.02537
																	0.09884	-0.09994	0.09651	0.14334
																	0.09896	0.46158	1.26957	0.05558
																	-0.04851	0.23249	0.50937	0.04445
																	0.21595	0.32177	0.27106	0.15962
																	0.21958	0.13881	0.20418	0.05822
																	0.22567	0.0584	0.49438	1.05612
																	0.06112	0.3365	0.00878	0.68095
																	0.05738	0.13453	0.89705	1.33835
																	0.06305	-0.01279	0.83427	0.01233
																	0.17316	0.04411	0.25691	0.86732
																	0.21	0.07569	0.39316	1.50195
																	0.45023	0.52863	0.23397	1.35761
																	0.28165	0.8587	0.03414	0.17477
																	0.28987	0.03897	0.5291	0.90215
																	0.52525	0.30103	0.01858	0.93726
																	0.43352	0.38459	0.38241	0.83251
																	1.45409	1.30257	0.03774	1.09187
																	0.12347	0.10096	1.01581	1.42968
																	0.09407	1.15983	1.48121	2.11904
																	1.05871	0.79382	0.51596	1.5628
																	0.65325	0.58426	0.19702	2.16526
																	0.55162	0.08556	0.47051	1.63333
																	1.00849	0.72976	0.15359	2.17296
																	0.44156	0.85148	0.70047	0.34623
																	0.41432	0.25908	0.44293	0.54624
																	0.3239	1.16204	0.28535	0.15735
																	0.39727	1.28464	0.5227	0.10657
																	0.38693	1.08403	1.11997	0.50262
																	0.23327	1.27206	1.01417	0.1598
																	0.23392	0.0752	0.46381	1.45425
																	0.10743	0.72013	0.6988	0.08735
																	0.06455	1.33829	0.66876	0.08407
																	0.0584	0.08531	0.0347	0.05505
																	0.19341	1.7807	0.63093	0.2454
																	0.27024	0.20661	0.03775	0.04992
																	0.35815	1.55133	0.26162	0.06718
																	0.07958	1.08545	0.28119	1.01571
																	0.12278	0.1061	0.41962	0.40365
																	0.08112	2.15328	0.07267	0.0204
																	0.06976	1.47862	0.56241	-0.02261
																	0.35558	0.21587	1.34912	0.0689
																	0.05571	1.9524	1.08994	0.20695
																	0.21707	0.07334	1.08981	0.04057
																	0.07113	2.20895	0.46673	-9.67742e-05
																	0.04261	0.31865	0.64038	0.00253
																	0.00649	-0.03349	0.70653	0.03267
																	0.00105	-0.0192	0.09154	-0.07252
																	0.00116	-0.00564	0.25997	0.5335
																	0.00731	-0.02437	1.12495	0.00481
																	-0.04234	-0.00855	0.07903	0.00221
																	0.02911		0.08408	0.00213
																	-0.01026		0.00844	-0.01838
																	0.00462		0.3531	0.00788
																	-0.00367		0.36044	0.01078
																	-0.00086		0.27349	-0.15158
																	0.00608		0.09459	-0.02566
																	0.01304		0.73013	0.93039
																			-0.0195	0.08603
																			0.0984	0.01627
																			0.24281	0.00509
																			0.71326	-0.00557
																			0.32019	0.41377
																			0.11907	0.70456
																			0.00822	1.07251
																			0.73766	-0.00263
																			-0.000493333	0.00822
																			0.59968	1.31434
																			0.17952	0.07685
																				0.60065
																				0.48295
																				1.29881
																				0.69899
																				0.93801
																				0.882
																				0.41453
																				1.17209
																				1.35961
																				1.46445
																				0.22009
																				0.06597
																				0.22293

## Sheet: Figure 1S1D
	mTRPA1/IRES/GFP			mTRPA1-mCherry
	Response Amplitudes (Baseline substracted)							Statistics
	Thymol 100 µM	Thymol 300 µM		Thymol 100 µM	Thymol 300 µM
	0.59747	0.30725		0.23618	0.57437
	0.20369	0.75633		0.25011	1.67112			mTRPA1/IRES/GFP Thymol 100 µM			mTRPA1/IRES/GFP Thymol 300 µM
	0.56977	0.86924		0.44891	0.31623			vs			vs
	0.01891	0.03908		0.01053	1.06301			mTRPA1-mCherry Thymol 100 µM			mTRPA1-mCherry Thymol 300 µM
	0.03083	0.67354		0.69743	1.32728
	0.15643	0.01052		0.06047	2.22722			Mann Whitney test			Mann Whitney test
	0.46075	0.04252		0.05748	2.07501			P value	0,0921		P value	0,2110
	0.09452	0.00108		0.05747	1.61706			Exact or approximate P value?	Gaussian Approximation		Exact or approximate P value?	Gaussian Approximation
	-0.000629032	0.32986		0.1283	0.40619			P value summary	ns		P value summary	ns
	0.14623	0.12341		0.15232	1.37211			Are medians signif. different? (P < 0.05)	No		Are medians signif. different? (P < 0.05)	No
	0.12553	0.71689		0.20019	1.71665			One- or two-tailed P value?	Two-tailed		One- or two-tailed P value?	Two-tailed
	0.05725	0.33483		0.37673	0.60359			Sum of ranks in column A,C	6145 , 8051		Sum of ranks in column B,D	11027 , 7888
	2.02775	0.2132		0.96192	0.3576			Mann-Whitney U	2985		Mann-Whitney U	4006
	0.329	0.50876		-0.02899	0.64165
	0.19147	0.67581		-0.00575	0.58784
	0.09015	1.51156		0.40084	0.45694
	0.62096	0.77145		0.67936	0.75921
	0.3435	0.81588		0.65499	0.94305
	0.67064	0.09238		0.06238	0.76021
	0.14494	0.39248		0.09623	0.01119
	0.01375	0.05041		0.08691	1.67458
	0.37656	0.03		0.60758	0.25286
	0.15945	0.95387		0.83065	0.22237
	0.38437	0.59452		0.0313	0.84482
	0.07015	0.31636		0.15992	0.14207
	0.03591	0.36839		0.11366	0.9836
	-0.01764	0.11509		0.21794	0.84099
	0.49151	1.93893		0.09688	1.07849
	0.65738	1.12391		0.11027	1.20299
	-0.03158	2.29127		0.35993	0.2099
	0.75695	0.46155		0.04473	0.02965
	0.909	0.0103		0.39091	0.70334
	0.03107	0.99708		0.03674	0.12809
	0.0398	0.00762		0.51227	0.64816
	0.66008	0.32736		0.58905	1.31849
	0.02745	0.02042		0.15806	1.62725
	0.3722	0.24214		0.54195	0.58008
	0.15014	0.39299		0.2543	0.53683
	0.1936	0.16898		0.65948	1.38314
	0.21298	3.41358		0.04292	0.92078
	0.52783	2.64976		0.20563	0.38751
	0.0163	4.25063		0.25461	1.04119
	0.11846	1.20854		0.27544	0.4216
	0.23637	0.21377		0.43875	2.27984
	0.55007	0.70602		0.39506	0.71145
	-0.0146	0.18042		0.04645	1.12409
	0.22291	4.40992		0.10922	0.89712
	-0.01365	3.76674		0.0874	0.7962
	0.46591	1.00729		-0.01275	0.52141
	0.47791	0.44568		0.36204	0.97109
	0.07568	0.11084		0.37522	1.81525
	0.44145	0.04218		0.05384	0.01764
	0.15911	0.0395		-0.02307	-0.02833
	0.07398	0.00758		0.22166	0.14399
	2.24745	0.00909		-0.03494	0.31956
	0.20153	0.63276		-0.01263	0.34614
	0.47145	1.60809		0.06255	0.87477
	0.2678	1.47622		0.95524	0.91253
	0.55123	0.11056		0.91026	1.76043
	0.0325	0.51139		0.00949	0.00576
	0.01709	0.66154		0.25299	0.20971
	-0.01665	0.65747		0.05275	2.33799
	-0.03309	1.48584		0.15466	0.34432
	-0.0142	0.88986		0.93586	1.69339
	0.24537	0.59931		1.58488	0.48569
	0.14561	1.05007		0.07556	0.91251
	-0.02477	0.20463		0.0116	0.81965
	-0.0331	1.38161		0.11192	0.52197
	-0.03023	1.14451		-0.05564	1.75048
	0.05286	-0.01887		0.24164	0.79713
	-0.00403	0.50264		0.17118	0.1005
	0.10091	0.79541		0.03218	0.10193
	0.0295	1.3979		0.15617	0.04599
	-0.00516	0.23811		1.56549	0.39174
	0.02147	1.27072		1.31822	0.33264
	0.18951	0.08905		0.86804	0.13886
	0.53129	1.41632		0.61735
	-0.04789	1.19067		0.46809
	0.54187	0.10331		0.08382
		2.48146		0.29671
		1.75765		1.84156
		0.44606		0.17146
		0.15329		0.75323
		1.56586		0.52514
		0.06312		0.02404
		0.06423		1.06981
		0.20402		0.16281
		0.75125		0.20048
		0.84205		0.33727
		0.16042
		0.08543
		1.43046
		0.15152
		0.08677
		1.28776
		0.98249
		1.75613
		0.59935
		0.11037
		0.07207
		0.37525
		0.53642
		0.63175
		0.29219
		0.52846
		1.59873
		1.1246
		1.37463
		1.34856
		0.19084
		0.31109
		1.67776
		0.46416
		0.98348
		1.41702
		0.99251
		1.85653
		0.63538
Mean	0.2677	0.7869		0.3377	0.8042
SEM	0.04311	0.07807		0.04111	0.06985
