# Supplementary material for: Mouse TRPA1 function and membrane localization are modulated by direct interactions with cholesterol
Source: eLife. 2019 Jun 11;8:e46084. doi: 10.7554/eLife.46084 (PMC6590989; doi:10.7554/eLife.46084)
Supplement: Figure 2—figure supplement 1—source data 1. [file elife-46084-fig2-figsupp1-data1.xlsx]

## Sheet: F2S1
	Normalized Intensity							Normalized Intensity							Normalized Intensity
	CONTROL							CONTROL							CONTROL
Fractin nr.	Flotillin exp1	Flotillin exp 2	Flotillin exp3	Mean	SEM		Fractin nr.	mCherry exp1	mCherry exp 2	mCherry exp3	Mean	SEM		Fractin nr.	NaK exp1	NaK exp 2	NaK exp3	Mean	SEM
1	0.00294	0.01266	0.03349	0.01636	0.00901		1	0.000901549	0.0048	0.00669	0.00413	0.0017		1	0.000728505	0.00132	0.00735	0.00313	0.00211							0	0.33333	0.33333	Flotillin	1.33333	0.33333
2	0.01992	0.22481	0.68308	0.30927	0.19604		2	0.000927533	0.00495	0.00597	0.00395	0.00154		2	0.000579327	0.00153	0.005	0.00237	0.00134							0			mA1Cherry	1	0
3	0.99998	1.00001	1.00001	1	9.33136e-06		3	0.03216	0.13256	0.48723	0.21732	0.13803		3	0.000525488	0.32495	0.0066	0.11069	0.10714							1			NAK	0.33333	0.33333
4	0.43735	0.58988	0.35973	0.46232	0.0676		4	1	1.00001	0.6405	0.88017	0.11983		4	0.01246	0.40399	0.00645	0.14097	0.13152							--
5	0.45448	0.36854	0.16516	0.32939	0.08578		5	0.98514	0.90208	0.99999	0.9624	0.03046		5	0.37915	0.56647	0.21032	0.38531	0.10286
6	0.32028	0.2588	0.06184	0.21364	0.07795		6	0.54776	0.90426	0.83547	0.7625	0.10919		6	1.00003	1.00001	0.99999	1.00001	1.1137e-05
7	0.17626	0.22266	0.03156	0.14349	0.05755		7	0.32798	1.14458	0.6902	0.72092	0.23623		7	0.38739	0.78026	0.83831	0.66865	0.14163
8	0.07937	0.06167	0.00984	0.05029	0.02086		8	0.1051	0.48968	0.43714	0.34397	0.1204		8	0.07469	0.09855	0.39127	0.18817	0.10178
	Normalized Intensity							Normalized Intensity							Normalized Intensity
	MCD 10 mM							MCD 10 mM							MCD 10 mM
Fractin nr.	Flotillin exp1	Flotillin exp 2	Flotillin exp3	Mean	SEM		Fractin nr.	mCherry exp1	mCherry exp 2	mCherry exp3	Mean	SEM		Fractin nr.	NaK exp1	NaK exp 2	NaK exp3	Mean	SEM
1	0.00142	0.00087157	0.00424	0.00218	0.00104		1	0.0012	0.00274	0.00523	0.00306	0.00117		1	0.000720263	0.000616641	0.00466	0.002	0.00133
2	0.0021	0.00162	0.00422	0.00265	0.000797722		2	0.00118	0.00257	0.00577	0.00317	0.00136		2	0.00075484	0.000668341	0.00544	0.00229	0.00158
3	0.09638	0.00272	0.01835	0.03915	0.02897		3	0.00264	0.00303	0.00684	0.00417	0.00134		3	0.000751324	0.000620949	0.00666	0.00268	0.00199
4	0.99999	1.00001	0.93584	0.97861	0.02138		4	0.6494	0.33094	0.03032	0.33689	0.17874		4	0.00768	0.00614	0.00593	0.00658	0.000552717
5	0.77727	0.8632	0.99999	0.88015	0.06485		5	0.99999	1	0.87005	0.95668	0.04332		5	0.21903	0.19924	0.0054	0.14122	0.06815
6	0.74893	0.66041	0.49685	0.6354	0.07384		6	0.27058	0.61139	1.00002	0.62733	0.21072		6	1.00001	0.99997	0.36972	0.7899	0.21009
7	0.44528	0.48759	0.41322	0.4487	0.02154		7	0.12631	0.59262	0.64258	0.45384	0.1644		7	0.42369	0.93079	0.99999	0.78482	0.18167
8	0.2649	0.23307	0.21208	0.23668	0.01535		8	0.05791	0.24517	0.16873	0.15727	0.05436		8	0.10043	0.24909	0.7314	0.36031	0.19044
	Mean	SEM						Mean	SEM						Mean	SEM
Fraction shift	1.33333	0.33333					Fraction shift	1	0					Fraction shift	0.33333	0.33333
