# Supplementary material for: Mouse TRPA1 function and membrane localization are modulated by direct interactions with cholesterol
Source: eLife. 2019 Jun 11;8:e46084. doi: 10.7554/eLife.46084 (PMC6590989; doi:10.7554/eLife.46084)
Supplement: Figure 3—figure supplement 1—source data 1. [file elife-46084-fig3-figsupp1-data1.xlsx]

## Sheet: F3S1B
Response Amplitudes at time point 2.9 min
AITC (30 µM)				Mean	SEM
CTR t = 2.9 min	SMASE t = 2.9 min		CTR	0.5189	0.02741
0.5271	0.13046		SMASE	0.42106	0.04275
0.71	0.12052
0.9948	0.17964
0.537	0.47722		CTR t = 2.9 min
0.7022	0.17236		vs
0.0993	0.62427		SMASE t = 2.9 min
0.9134	0.07071
0.8999	0.21229		Mann Whitney test
0.8643	0.94295		P value	0.024
0.6947	0.06559		Exact or approximate P value?	Gaussian Approximation
0.4403	0.87715		P value summary	*
0.685	0.61741		Are medians signif. different? (P < 0.05)	Yes
0.2654	0.86457		One- or two-tailed P value?	Two-tailed
0.7952	0.22282		Sum of ranks in column F,G	17126 , 6310
0.7138	0.09558		Mann-Whitney U	4032
0.1401	0.15958
0.0786	0.93625
0.7434	0.11548
0.4505	0.10616
0.49	0.16568
0.6712	0.09873
0.1463	0.15483
0.8163	0.99506
0.2781	0.07695
0.761	0.51167
0.7432	0.25487
0.6501	0.11081
0.1964	0.93882
0.5653	0.917
0.6117	0.82696
0.5542	0.09502
0.1218	0.15996
0.8043	0.15654
0.7723	0.86382
0.3421	0.14233
0.1213	0.86733
0.5676	0.66704
0.741	0.20007
0.6065	0.10281
0.4835	0.08505
0.1177	0.66261
0.412	0.88497
0.6208	0.17026
0.7295	0.11697
0.3708	0.09669
0.2107	0.08745
0.1864	0.06833
0.8109	0.72428
0.452	0.49068
0.8451	1.05917
0.6033	0.8696
0.3545	0.38747
0.3217	0.57185
0.6211	0.11959
0.4385	0.5198
0.5233	1.00586
0.5379	0.25586
0.495	0.10914
0.2483	0.98639
0.3268	0.97906
0.3988	0.10672
0.4135	0.11566
0.3124	0.75831
0.1564	0.21171
0.1075	0.42678
0.1131	0.04368
0.761	1.00006
0.7463
0.2574
0.8621
0.823
0.4366
0.8433
0.3973
0.6775
0.202
0.5838
0.1775
0.4336
0.8976
0.7105
0.1209
0.7933
0.926
0.7852
0.1168
0.9139
0.6561
0.52442
0.02746
0.1218
0.8043
0.7723
0.3421
0.1213
0.5676
0.741
0.6065
0.4835
0.1177
0.412
0.6208
0.7295
0.3708
0.2107
0.1864
0.8109
0.452
0.8451
0.6033
0.3545
0.3217
0.6211
0.4385
0.5233
0.5379
0.495
0.2483
0.3268
0.3988
0.4135
0.3124
0.1564
0.1075
0.1131
0.761
0.7463
0.2574
0.8621
0.823
0.4366
0.8433
0.3973
0.6775
0.202
0.5838
0.1775
0.4336
0.8976
0.7105
0.1209
0.7933
0.926
0.7852
0.1168
0.9139
0.6561
0.52442
0.02746

## Sheet: F3S1C
First derivative maxima presenting delay in the Ca2+ response
upon AITC (30 µM)
CTR	SMASE
71.56	139.04		Max d[Ca2+]/dt (nM/min)
120.36	106.58			Mean	SEM
166.3	15.27		CTR	72.1	5.02
69.24	33.54		SMASE	54.56	6.53
94.94	75.4
33.22	9.11
141.4	84.67		Max d[Ca2+]/dt (nM/min) CONTROL
154.16	3.88		vs
145.68	18.65		Max d[Ca2+]/dt (nM/min) SMASE
112.5	145.56
55.76	3.15		Mann Whitney test
97.92	130.19		P value	0.0071
30.6	79.79		Exact or approximate P value?	Gaussian Approximation
126.56	111.97		P value summary	**
126.52	16.62		Are medians signif. different? (P < 0.05)	Yes
10.98	2.11		One- or two-tailed P value?	Two-tailed
6.94	4.66		Sum of ranks in column I,J	7402 , 4074
105.16	11.53		Mann-Whitney U	2058
68.44	3.67
41.26	12.28
108.92	3.03
17.78	11.07
115.58	4.07
34.84	63.12
117	12.11
127.4	104.45
83.72	136.16
13.78	123.03
88.66	134.19
88.22	11.46
58.26	13.27
8.06	3.13
138.04	106.96
133.52	5.12
45.6	132.2
5.56	72.24
76.54	26.16
102.26	3.18
64.94	3.35
52.82	77.49
7.12	87.28
46.18	15.33
87.08	6.36
103.1	8.66
32.68	3.47
6.4	8.68
20.96	102.74
96.94	66.48
57.3	167.95
160.4	108.14
73.12	47.25
30.92	74.23
28.82	5.35
93.3	51.61
33.28	117.95
54.2	65.95
52.48	4.83
46.02	142.64
16.52	143.67
31.52	11.79
38.58	27.6
38.32	96.89
25.66	19.08
20.36
6.7
6.9
112.98
90.94
30.72
143.64
110.44
42.78
129.82
35.08
98.76
19.58
78.42
17.3
53.54
143.58
85.3
7.4
110.12
156.08
116.9
6.68
153.94
125.36

## Sheet: F3S1E
Response Amplitudes DRGs (Baseline substracted)
CONTROL		SMASE 50 mUN				CONTROL		SMASE 50 mUN
Thymol (300 µM)	K+ (50 mM)	Thymol (300 µM)	K+ (50 mM)			Mean	SEM	Mean	SEM
0.0483068	0.148172	0.283125	0.843618		Thymol	0.664592	0.0603367	0.384887	0.0362061
0.0597142	0.884581	0.149274	0.204589		K+	0.495397	0.0302198	0.398583	0.0370823
0.0718229	0.70494	0.247672	0.218861
0.251624	0.814936	0.133715	0.145758
0.217249	0.609425	0.0487947	0.178218		Thymol (300 µM) CONTROL
0.0604257	1.44497	1.14616	0.482566		vs
0.0752718	0.937802	0.151643	0.226896		Thymol (300 µM) SMASE
1.65657	0.252195	0.370618	1.61558
0.111814	0.449845	0.79515	0.401101		Mann Whitney test
1.8501	1.01372	0.218535	0.232835		P value	0.0007
0.0885173	0.242423	0.84812	0.827827		Exact or approximate P value?	Gaussian Approximation
0.0623384	0.386649	0.843232	0.809059		P value summary	***
0.0886578	0.32174	0.146447	0.634514		Are medians signif. different? (P < 0.05)	Yes
0.0532653	0.89508	0.250596	1.39253		One- or two-tailed P value?	Two-tailed
1.52236	0.549631	0.0236563	0.220158		Sum of ranks in column A,C	19378 , 15338
0.0583077	0.723067	0.0230799	0.11166		Mann-Whitney U	6560
0.0939356	0.175692	0.0366578	0.193086
1.15663	1.0448	0.0320446	0.219706
0.208943	0.696071	0.416257	0.30228
0.531341	1.45558	0.860465	0.426812
3.12738	0.458851	0.677179	0.409192
1.09064	1.08124	0.29939	0.476071
0.0488849	0.134427	0.0457957	0.0172441
1.24318	0.980974	0.109024	0.134097
0.900898	0.785161	0.063058	0.458993
0.662508	0.906439	0.0549176	0.15047
0.263115	0.229771	1.04049	0.852118
0.0460412	0.435106	0.409814	0.619948
0.503244	0.601383	0.0572592	0.0275609
0.810881	0.222774	0.0614297	0.88013
0.135549	-0.0570639	0.163833	0.619666
0.0913639	-0.00257671	0.36779	0.48187
2.30392	1.10167	0.0355947	0.0172914
1.64046	0.978084	0.0560448	0.0148048
1.43232	0.453387	0.0704368	0.439671
0.0645634	0.593502	0.387956	0.329862
0.770972	0.495041	1.70251	1.20016
0.908608	0.680583	0.105957	1.02982
1.79621	0.0885355	1.50501	1.18014
0.337876	0.941809	0.488056	0.166241
0.057958	0.154589	0.0944451	0.0212553
1.22629	-0.056264	0.118583	0.598609
0.244584	0.223875	0.140015	0.513333
0.517535	0.148075	0.119387	0.447734
0.144994	0.70852	0.23151	0.491736
2.76033	0.0307537	0.161562	1.02853
0.102745	1.38824	0.887683	0.513129
0.810529	0.01133	1.18696	0.386645
0.758511	1.87374	1.15562	0.817341
0.154106	0.249521	0.0333997	0.0134778
0.0908922	-0.00188856	0.151624	1.07372
0.0680925	0.0761264	0.0331175	0.862969
0.169528	0.501702	1.27666	0.180649
0.179219	0.871175	0.0604148	0.104752
0.305815	0.223551	0.234311	0.244522
0.95477	0.0570388	0.363319	0.203791
1.22285	0.342867	1.01735	0.543544
0.263866	1.03158	0.727205	0.169593
0.105625	0.0383627	0.0935182	0.633375
0.0718436	0.970094	0.0480091	0.0315537
0.129256	0.0546375	0.20376	0.0124177
0.231062	0.111065	0.105006	0.602902
0.205272	-0.0219985	1.34655	0.248366
0.136434	0.0522751	0.420067	0.0769379
0.133701	1.19019	0.256641	0.358201
0.384602	0.00487415	0.135728	0.0661351
0.893926	0.251913	0.248206	0.0208408
0.120354	0.563701	0.127616	1.05505
0.0590542	0.611779	0.282575	1.11838
0.545838	0.53326	0.21493	0.0664202
0.194151	0.354867	0.123405	0.212968
2.57274	0.364386	0.32169	0.171518
0.654922	1.08682	0.711058	0.117674
0.469253	0.122914	0.531905	0.0992689
0.623139	0.419009	0.483785	0.396589
0.384602	0.606696	0.694751	0.21462
0.893926	0.251913	0.351364	0.0394953
0.120354	0.563701	0.20306	1.20299
0.0590542	0.611779	0.090856	0.151239
0.545838	0.53326	0.121156	0.704269
0.194151	0.354867	0.280303	0.0754784
2.57274	0.364386	0.115292	0.1827
0.654922	1.08682	0.0777975	0.264528
0.0508634	0.122914	0.133692	0.827788
0.0481827	0.498972	0.153304	0.195684
0.780219	0.27031	0.0501915	0.106543
1.59218	0.81201	0.0256049	0.161747
0.681752	0.27031	0.0630909	0.240997
1.17719	0.81201	0.0525779	0.211221
2.4607	0.491926	0.0480176	0.279503
0.881807	0.776527	0.238281	0.0351889
0.446826	0.520795	0.0584425	0.0407838
0.320011	0.602427	0.0250725	0.189061
0.922759	0.417009	0.0514718	0.0347198
0.137406	0.287397	0.0861105	0.260537
0.780219	0.483811	0.0712352	0.147959
1.59218	0.539638	0.048304
0.681752	0.714778	0.0873183
1.17719	0.195387	1.23269
2.4607	0.491926	0.393471
0.881807	0.776527	0.134602
1.70201	0.520795	0.343628
1.58757	0.602427	0.514073
0.165657	0.417009	0.403167
1.5693	0.287397	1.38263
0.797868	0.443955	0.124602
0.812415	0.485613	0.126271
0.153648	0.412102	1.06303
0.150438	0.486531	0.996072
0.434689	0.290872	0.15417
0.43976	0.097269	0.248305
0.101131	0.256038	0.847128
1.12216	0.21823	0.849927
1.08486	0.4112	0.696844
0.223357	0.445495	0.343876
1.15403	0.570733	0.107917
0.700531	0.81411	0.102787
0.144312	0.4172	0.475683
0.854297	0.247198	0.225166
0.0917333	0.554792	0.248449
0.445251	0.200257	1.23485
0.126127	0.437018	0.126685
0.440957	0.681449	1.37821
1.67748	0.311181	0.803989
0.0973943	0.12987	0.542861
0.130626	0.738021	0.461395
2.13807	0.335644	1.85573
0.249345	0.176382	0.440242
1.15585	0.190258	1.16901
0.4249	0.434314	0.14822
0.376801	0.546445	0.0611625
	0.447887	0.0664915
	0.464804
	0.11877
	0.826146
