# Supplementary material for: Mouse TRPA1 function and membrane localization are modulated by direct interactions with cholesterol
Source: eLife. 2019 Jun 11;8:e46084. doi: 10.7554/eLife.46084 (PMC6590989; doi:10.7554/eLife.46084)
Supplement: Figure 3—figure supplement 3—source data 1. [file elife-46084-fig3-figsupp3-data1.xlsx]

## Sheet: F3S3A
Response Amplitudes (Baseline substracted)
AITC 100 µM
Control	MCD 1 mM	MCD 5mM	MCD 10 mM			Thymol Response Amplitudes
2.2823	1.9037	1.3058	0.0538		MCD concentration (mM)	Mean	SEM
1.7165	1.8862	1.7576	1.3752		0	1.7308	0.0498
2.0573	1.6783	1.1622	1.5026		1	1.2915	0.0635
1.6881	2.3238	1.6978	1.0848		5	1.215	0.0627
2.1757	1.4896	2.971	1.421		10	1.0774	0.0604
2.3169	1.8336	1.3629	0.087
2.4853	1.889	1.7811	0.1052
1.7069	2.0207	0.3477	1.4223
1.8244	1.7492	1.487	0.1889		CTR
2.5253	1.3626	1.2304	1.1276		vs
2.2753	1.1234	1.4961	0.0403		MCD1
2.2272	2.7012	0.2339	1.6367
2.1646	1.5506	1.0136	1.3317		Mann Whitney test
1.9258	1.4637	1.3734	1.584		P value	< 0.0001
2.7164	1.3775	1.2255	1.8099		Exact or approximate P value?	Gaussian Approximation
2.9259	1.554	0.3469	0.0793		P value summary	***
2.7753	1.3629	1.1548	0.0714		Are medians signif. different? (P < 0.05)	Yes
3.4021	1.2961	0.2293	1.1638		One- or two-tailed P value?	Two-tailed
3.0191	1.4888	1.18	0.9737		Sum of ranks in column A,B	36830 , 20460
2.614	1.539	1.3286	1.4345		Mann-Whitney U	9285
1.4403	1.7485	0.6689	1.0642
1.2127	1.2643	0.8649	0.241		CTR
2.4272	2.0463	1.5566	1.0274		vs
2.6627	2.0887	0.9809	1.1313		MCD5
1.8136	1.2178	1.4051	0.219
1.3408	2.8706	2.0539	1.0209		Mann Whitney test
2.5199	3.0413	1.5153	1.2256		P value	< 0.0001
1.4374	1.3752	0.5305	1.3687		Exact or approximate P value?	Gaussian Approximation
2.1315	3.9819	0.5965	1.6029		P value summary	***
1.543	2.4617	1.4066	1.3276		Are medians signif. different? (P < 0.05)	Yes
1.8814	2.1051	1.5863	0.5636		One- or two-tailed P value?	Two-tailed
1.7132	1.7958	1.4724	2.1576		Sum of ranks in column A,C	35917 , 17384
1.7245	1.4526	1.7689	1.9924		Mann-Whitney U	7931
2.9232	1.38	1.2713	1.6681
2.8021	2.5012	1.0556	0.1377		CTR
2.5275	1.7978	0.9688	1.7809		vs
2.5382	1.888	1.8564	0.1573		MCD10
2.7892	1.8223	2.1338	2.3907
1.4365	2.0668	1.7942	2.3328		Mann Whitney test
1.9451	1.1866	2.34	0.9343		P value	< 0.0001
2.2089	2.3059	0.156	1.6137		Exact or approximate P value?	Gaussian Approximation
1.1978	2.0518	-0.016	1.5082		P value summary	***
1.4422	1.9135	1.1149	1.9631		Are medians signif. different? (P < 0.05)	Yes
1.6121	0.8016	2.2317	1.1475		One- or two-tailed P value?	Two-tailed
1.2416	2.7593	1.0793	2.193		Sum of ranks in column A,D	33263 , 10397
1.3818	1.1991	1.3275	1.6634		Mann-Whitney U	4726
2.4184	0.1006	0.7089	0.9676
2.4402	0.0469	1.729	0.0464
2.5716	0.8673	0.0403	0.0635
1.2096	0.2469	0.0371	1.3967
1.4664	0.1445	0.1955	0.3499
1.1891	1.2017	0.1693	0.5906
1.481	0.5148	0.0913	1.4729
1.801	0.2735	0.416	0.7718
1.9014	1.0295	0.2151	1.4764
1.3938	1.5823	0.9347	1.3908
0.9872	0.397	0.3898	1.4053
2.2856	0.4303	0.4516	0.7556
2.3364	1.5612	0.1265	0.3187
2.1386	0.2078	0.3098	1.1118
1.6836	0.7027	1.5957	1.1359
2.4265	0.7558	0.1214	0.045
2.3661	0.1071	1.2862	1.276
2.1506	1.8015	0.2365	1.4692
1.6566	0.8351	2.8386	1.2126
1.3796	1.2826	0.0784	1.0987
2.3318	1.8002	1.6192	1.1472
1.9993	0.0692	1.7284	1.3176
1.8515	1.2365	1.2304	1.0321
1.9059	1.4489	1.7655	1.4876
0.1514	0.4117	1.9516	0.1027
0.9859	1.9001	1.7905	0.9742
1.0917	2.7289	0.6597	1.1707
1.1685	2.5047	0.8418	0.8738
1.3926	1.713	1.4971	1.4784
1.1989	1.0944	2.1428	1.0994
1.0408	1.6581	1.8268	1.47
1.4823	1.1784	1.2871	1.364
1.0464	1.4933	1.6283	0.7765
1.0551	0.8857	1.7116	1.2309
0.3051	1.3208	1.4161	1.1098
1.5759	1.2798	1.3774	1.1111
0.9032	1.4736	1.789	1.1198
0.566	1.5582	1.3599	1.107
-0.0384	2.4812	1.6371	1.0612
1.8203	2.1287	2.006	1.7906
1.6581	1.692	1.8679	2.1443
1.5945	1.0516	1.6811	0.7602
1.055	0.8148	1.7199	0.2893
0.8172	0.6901	0.5877	2.1654
1.0829	1.9895	0.2409	1.2539
1.2485	0.7699	1.9861	1.2452
2.1908	0.081	1.6737	1.5477
1.4886	0.3541	2.2886	1.3393
1.9366	0.8916	1.8301	0.5361
1.5293	1.2989	1.8173	1.5845
1.2479	1.8551	2.1183	1.1754
1.3	0.999	1.8344	0.0652
1.4094	0.6268	1.34	1.7203
0.6437	0.365	1.2853	2.3308
1.1949	0.1957	0.7027	1.0535
1.8563	0.8886	1.4979	0.267
1.5355	0.0905	1.2988	-0.0783
1.8773	0.1148	0.8817	0.1559
1.7294	1.1203	0.2569	0.5029
2.5105	0.219	1.0051	0.0381
0.8723	0.5555	2.1209
1.7699	0.462	1.9824
1.5654	1.3496	0.2172
2.0268	0.2397	1.8574
2.2272	1.2896	2.2016
1.6833	0.824	2.3784
2.3509	0.2506	2.0874
1.842	1.6768	2.7882
1.7551	1.1339	0.8675
1.9355	0.7822	1.2337
2.2282	0.4154	1.7599
2.619	0.0231	1.799
2.0261	0.0118	1.7673
1.0577	1.8363	1.5315
2.5137	2.1264	1.9541
1.8993	2.0615	2.5405
2.2744	1.0262	2.5785
1.6176	2.1834	1.3406
1.1559	2.4488	0.2541
1.3139	0.1985	0.169
1.4631	1.4106	0.2291
1.7741	0.2664	0.5359
1.2544	1.386	0.1747
1.5851	0.5138	0.2937
1.3423	1.6557	0.5724
1.9355	0.5439	0.9635
1.8958	0.9965	0.0528
1.3771	1.2265	0.4679
1.3721	2.6274	0.0363
1.8638	1.5834	0.1927
1.0893	0.279	-0.0567
1.1179	0.3008
0.9218	1.6866
1.6258	2.1516
2.0352	1.5323
2.1495	1.8512
2.2524	2.2144
0.779	0.9537
1.9957	1.5479
3.3182	1.3058
2.4529	0.0217
2.3331	0.1584
2.3383	0.0423
2.5389
2.8635
1.7651
1.3431
2.2132
2.135
2.3095
1.8509
1.5856
1.8631
2.0504
1.4186
1.4096
0.0513
0.2238
2.2092
2.045
2.2464
2.2638
2.8056
2.3819
0.9933
1.1763
2.1409
1.9161
2.4348
1.7755
2.2746
0.6284
2.5416
2.5522
1.9131
0.8894
0.6328
0.152
0.0266
0.1934
0.0141
0.471
0.0741

## Sheet: F3S3B
Response Amplitudes (Baseline substracted)
Thymol 300 µM
Control	MCD 1 mM	MCD 5mM	MCD 10 mM
1.5982	2.25531	1.48202	1.49577			Thymol Response Amplitudes
1.90313	2.12107	0.15893	0.86179		MCD concentration (mM)	Mean	SEM
0.67522	1.09356	0.24739	0.02957		0	1.06534	0.08428
1.66614	0.19495	1.59548	0.03266		1	0.90104	0.08228
1.26897	0.23502	0.15293	1.34044		5	0.78606	0.09412
1.32784	1.56148	1.87407	0.20298		10	0.68783	0.0802
1.00672	0.25563	0.0833	0.39056
1.05067	0.20854	0.14686	0.22298
1.77147	1.04844	0.10572	0.07151		Control
1.53461	0.31604	2.29615	0.33578		vs
0.05575	1.28225	1.36483	1.37794		MCD 1 mM
2.08341	1.47797	0.57216	1.28256
1.33986	2.10072	1.40795	0.16511		Mann Whitney test
1.74864	1.82983	1.56307	0.2368		P value	0.2725
0.45616	1.55955	0.43034	1.05804		Exact or approximate P value?	Gaussian Approximation
0.36172	0.72071	0.38631	1.08604		P value summary	ns
1.01587	0.17367	1.6842	0.07371		Are medians signif. different? (P < 0.05)	No
0.40503	0.85647	1.28009	1.26054		One- or two-tailed P value?	Two-tailed
1.27966	2.55416	1.11604	1.41925		Sum of ranks in column A,B	6633 , 5770
0.34395	0.74779	0.89956	1.31139		Mann-Whitney U	2767
1.09507	0.09364	1.6336	0.30592
0.52447	0.13632	0.30911	0.62188		Control
1.80509	0.23935	0.16122	0.79274		vs
1.3678	1.23108	0.11595	0.13373		MCD 5mM
1.40327	1.43142	0.09193	1.42875
0.32257	0.24668	0.65261	0.10521		Mann Whitney test
1.57579	0.73593	0.21012	0.19943		P value	0.0405
0.7006	0.64251	0.46478	0.22576		Exact or approximate P value?	Gaussian Approximation
0.88092	0.51679	0.60238	0.20481		P value summary	*
0.11554	0.47855	2.05698	1.44361		Are medians signif. different? (P < 0.05)	Yes
1.18754	0.14209	2.15902	0.21354		One- or two-tailed P value?	Two-tailed
1.51878	0.28746	1.73377	0.55865		Sum of ranks in column A,C	6630 , 4846
1.69909	0.87505	1.16493	1.32823		Mann-Whitney U	2290
1.69647	0.6907	0.41357	0.13467
0.06607	0.7808	0.09974	0.52753		Control
0.27651	0.48649	0.3937	1.23367		vs
2.37299	1.25545	0.38056	1.05001		MCD 10 mM
0.48265	0.19598	0.14801	1.00837
1.89162	1.08907	0.0826	0.16197		Mann Whitney test
2.30709	0.57928	1.06069	0.15802		P value	0.0039
2.13361	0.06783	2.33987	1.39239		Exact or approximate P value?	Gaussian Approximation
2.29462	1.6405	2.03605	2.35972		P value summary	**
0.74713	1.22313	0.09328	0.13991		Are medians signif. different? (P < 0.05)	Yes
0.19326	0.37297	0.1105	0.15098		One- or two-tailed P value?	Two-tailed
1.46061	1.31965	2.42565	1.76405		Sum of ranks in column A,D	6374 , 3637
1.50225	0.30516	0.39315	1.13592		Mann-Whitney U	1746
1.87242	0.36722	0.36884	1.12481
2.87849	0.95563	2.65155	1.10034
1.43155	1.62018	1.01813	1.2284
1.46732	1.6334	1.06615	0.11805
1.74691	0.95607	1.6172	0.23424
0.41806	1.94264	1.54567	1.11416
1.12061	2.05375	2.18185	0.09969
-0.00836	0.33403	0.38552	1.28764
0.05825	0.19247	0.71102	2.35815
1.73411	0.13944	1.233	0.11222
2.00283	0.11411	2.22602	0.0149
1.2524	0.30223	0.21884	-0.02783
1.07729	1.59442	0.00998	0.03842
1.85889	0.28526	0.01093	0.07395
1.79878	0.13075	0.08425	0.0459
0.09549	0.28238	0.06005
0.06673	2.42964	0.02438
1.66007	1.30078	0.02474
0.16632	0.38874	0.00831
1.23775	0.3194	0.03835
0.40835	1.97676	0.06987
1.12185	2.14442	0.0271
0.10199	0.2025	0.01899
1.75219	1.94823	0.05578
1.82516	0.97252	-0.02764
1.46483	1.80722
0.00563	2.09328
0.0609	1.20354
0.0034	0.01675
-0.0016	0.000320339
0.00484	0.01484
-0.000967797
-0.00263
0.03285

## Sheet: F3S3C
Response Amplitudes (Baseline substracted)
AITC 100 µM
Control	SMASE 1 mUN	SMASE 10 mUN	SMASE 20 mUN	SMASE 50 mUN			Thymol Response Amplitudes
1.5982	2.1321	0.9757	1.2773	1.3074		SMASE concentration (mUN)	Mean	SEM
1.90313	1.9488	1.88	1.1542	1.6232		0	1.7308	0.0498
0.67522	1.9137	1.4115	1.4807	1.3845		1	1.4478	0.0875
1.66614	1.4291	1.6475	1.1482	1.7409		10	1.2572	0.0521
1.26897	1.1212	1.2526	0.8814	0.5757		20	1.1133	0.0496
1.32784	0.5301	1.7834	1.0144	1.0476		50	0.963	0.05
1.00672	1.1956	1.6683	0.5995	1.3597
1.05067	1.966	0.697	0.6827	1.4392
1.77147	2.0148	1.7564	1.0997	0.2065		Control
1.53461	1.2998	2.0793	1.2167	0.9487		vs
0.05575	1.3941	1.3155	0.6383	1.4569		SMASE 1 mUN
2.08341	1.5472	1.382	1.3377	1.4136
1.33986	1.3028	1.7707	0.4535	1.4818		Mann Whitney test
1.74864	1.8214	0.9354	1.8315	0.9588		P value	0.015
0.45616	1.7948	1.931	2.2261	1.0366		Exact or approximate P value?	Gaussian Approximation
0.36172	1.6551	1.8101	1.1656	1.0754		P value summary	*
1.01587	0.4823	1.9816	1.1143	1.032		Are medians signif. different? (P < 0.05)	Yes
0.40503	0.5409	0.861	1.7133	1.0697		One- or two-tailed P value?	Two-tailed
1.27966	1.9162	1.2063	0.8206	0.1797		Sum of ranks in column A,F	27250 , 9876
0.34395	1.9012	1.771	0.6735	0.3164		Mann-Whitney U	6390
1.09507	1.7042	0.9075	1.5192	1.146
0.52447	2.1797	1.2973	1.0935	0.7064		Control
1.80509	2.0753	1.0167	0.4391	0.827		vs
1.3678	1.7399	1.6022	1.3429	1.1082		SMASE 10 mUN
1.40327	1.8548	1.6637	1.098	1.2541
0.32257	2.3846	1.8314	0.7042	1.9908		Mann Whitney test
1.57579	0.6431	1.455	0.7165	1.5729		P value	< 0.0001
0.7006	1.8615	2.0082	0.8913	1.5714		Exact or approximate P value?	Gaussian Approximation
0.88092	2.2761	1.8797	1.161	0.7812		P value summary	***
0.11554	2.0803	1.5491	1.3687	1.7052		Are medians signif. different? (P < 0.05)	Yes
1.18754	2.0928	1.5738	1.0772	1.5317		One- or two-tailed P value?	Two-tailed
1.51878	1.9802	1.6406	0.2207	1.7253		Sum of ranks in column A,G	36274 , 17354
1.69909	2.2885	0.9493	0.9686	0.6358		Mann-Whitney U	7763
1.69647	1.9951	1.0997	1.2978	1.2468
0.06607	2.1514	1.6879	0.8806	1.2027		Control
0.27651	1.8142	1.6652	0.9291	1.0619		vs
2.37299	1.64	1.4003	-0.5485	0.1014		SMASE 20 mUN
0.48265	1.7213	2.0524	-0.2876	1.2088
1.89162	1.8558	1.9495	0.2815	1.523		Mann Whitney test
2.30709	2.4882	1.7371	1.1347	1.8108		P value	< 0.0001
2.13361	2.1355	2.144	2.1845	1.5817		Exact or approximate P value?	Gaussian Approximation
2.29462	1.5406	2.5928	1.7633	2.6451		P value summary	***
0.74713	1.9279	2.1454	1.6097	1.731		Are medians signif. different? (P < 0.05)	Yes
0.19326	3.0055	1.4739	1.5437	1.4066		One- or two-tailed P value?	Two-tailed
1.46061	0.412	1.4158	1.5236	1.6713		Sum of ranks in column A,H	37079 , 14924
1.50225	2.2229	0.8532	1.6056	1.6135		Mann-Whitney U	6013
1.87242	0.2588	0.5885	1.4959	0.1936
2.87849	1.6505	0.6936	0.9406	0.8215		Control
1.43155	1.9732	0.8526	1.9157	0.032		vs
1.46732	1.7072	1.1347	1.6571	0.6593		SMASE 50 mUN
1.74691	2.5005	0.7852	1.0557	0.3646
0.41806	2.8294	1.8118	0.9073	0.9842		Mann Whitney test
1.12061	2.7758	1.3485	0.0498	0.0122		P value	< 0.0001
-0.00836	3.1819	1.3888	0.0562	0.1794		Exact or approximate P value?	Gaussian Approximation
0.05825	1.9022	1.0564	0.2918	0.5267		P value summary	***
1.73411	1.3493	0.2062	0.1541	0.7942		Are medians signif. different? (P < 0.05)	Yes
2.00283	0.1964	1.1142	1.2077	1.1734		One- or two-tailed P value?	Two-tailed
1.2524	0.0203	0.4484	0.082	0.7314		Sum of ranks in column A,I	37485 , 12918
1.07729	0.1989	0.8491	1.0986	0.4586		Mann-Whitney U	4662
1.85889	1.496	1.2605	1.3936	0.2378
1.79878	1.5133	0.4803	0.0985	0.5232
0.09549	0.7557	1.0585	1.2434	0.8039
0.06673	0.0417	0.9053	0.6036	0.167
1.66007	0.4609	0.8696	1.7666	0.8617
0.16632	0.2431	0.309	1.224	0.622
1.23775	0.661	0.9498	0.2311	0.294
0.40835	0.1961	0.0425	0.9692	0.9368
1.12185	0.2846	0.9398	1.1656	1.7785
0.10199	0.3219	1.0779	0.8352	1.4453
1.75219	1.1251	0.2639	0.6791	0.5884
1.82516	0.3292	1.6664	1.4824	1.6695
1.46483	0.0735	1.9344	1.4356	2.1956
0.00563	0.4158	1.8	0.7702	0.8867
0.0609	0.4573	0.3959	0.8556	0.8076
0.0034	0.9021	1.856	1.4916	1.0034
-0.0016	1.6921	1.5294	0.7199	0.4788
0.00484	1.6619	1.5976	1.1957	0.5595
-0.000967797	2.3445	1.8707	0.1606	1.0297
-0.00263	0.1735	1.4344	0.9095	0.5663
0.03285	0.9859	-0.5787	1.4201	0.4624
	1.7858	0.2276	1.4653	1.4957
	1.4396	0.7133	1.1673	1.2213
	0.2858	1.0884	1.4575	0.907
		1.4938	1.4852	0.8461
		1.1536	2.0021	0.6587
		0.1968	1.5676	0.4187
		0.9338	1.852	0.5715
		1.8751	1.6209	1.1079
		2.2495	1.5192	0.3295
		1.6316	1.0773	0.3543
		1.0446	1.6868	0.1312
		0.1778	1.0676	0.1391
		0.9144	1.9201	1.6267
		1.006	0.5733	1.5648
		1.9371	0.5421	1.7878
		2.3756	0.4246	0.1256
		2.0353	0.1951	0.9068
		1.1921	1.1702	1.1846
		1.2392	1.3461	0.6078
		1.2486	1.0874	0.3033
		1.2971	1.4227	0.5057
		1.2675	1.6382	0.3828
		1.0708	2.1162	0.4157
		1.8048	0.8687	0.3098
		2.1133	0.926	0.6219
		0.5998	1.4052	0.6947
		1.3677	0.6798	0.4461
		1.2209	1.2377	1.6466
		0.8479	1.3908	2.0197
		1.4718	0.9797	0.6768
		1.0602	1.3743	0.98
		1.4679	1.8093	1.2001
		1.4679	1.6228	0.7413
		1.6983	0.1927	1.1732
		0.1863	1.6641	0.6207
		2.408	1.4506	1.0073
		1.3322	2.0586	0.411
		2.4366	1.5227	0.0553
		0.7881	2.2432	0.0918
		1.1939	0.8977	0.5199
		1.2952	2.4362	1.809
		1.5006	1.347	2.5194
		0.7139	2.0074	1.6152
		1.8446	0.6387	0.9867
		1.1867	0.5083	0.2371
		0.9354	0.4752	0.7552
		2.0953	1.9311	1.3151
		0.9375	0.9917	1.3519
		1.4298	0.1018
		1.3498	0.7106
		1.6673	1.7691
		0.0366	1.6701
		1.0458	0.1386
		-0.1028
		-0.0351
		-0.0538
		0.1377
		0.0312

## Sheet: F3S3D
Response Amplitudes (Baseline substracted)
Thymol 300 µM
Control	SMASE 1 mUN	SMASE 10 mUN	SMASE 20 mUN	SMASE 50 mUN			Thymol Response Amplitudes
1.5982	0.74852	1.00034	0.15076	0.08051		SMASE concentration (mUN)	Mean	SEM
1.90313	0.80025	0.97645	1.36226	0.58813		0	1.06534	0.08428
0.67522	0.3817	1.50062	0.99778	0.46001		1	0.8031	0.07136
1.66614	0.07251	1.34638	0.08733	0.29918		10	0.74256	0.08322
1.26897	0.37081	0.26536	0.32505	0.17442		20	0.71626	0.06398
1.32784	0.36248	-0.0321	0.68087	0.29771		50	0.49031	0.05797
1.00672	0.21989	0.04838	0.3374	0.44908
1.05067	1.26125	0.03347	0.49376	0.61319		Control
1.77147	1.55258	0.02512	0.83003	0.88569		vs
1.53461	1.05198	1.02299	1.03399	0.20798		SMASE 1 mUN
0.05575	0.19963	0.06128	0.13846	0.2346
2.08341	1.35853	0.19309	0.14046	0.29042		Mann Whitney test
1.33986	1.16729	1.687	1.23473	0.31647		P value	0.0023
1.74864	1.3007	2.01551	0.11084	0.23935		Exact or approximate P value?	Gaussian Approximation
0.45616	0.89126	1.42725	0.37487	1.16655		P value summary	**
0.36172	0.80617	0.56828	0.14276	1.42545		Are medians signif. different? (P < 0.05)	Yes
1.01587	0.04278	0.03535	0.11476	-0.11393		One- or two-tailed P value?	Two-tailed
0.40503	1.2291	0.16752	1.15544	0.58286		Sum of ranks in column A,F	7140 , 5106
1.27966	0.3829	0.04891	0.77531	0.80433		Mann-Whitney U	2180
0.34395	1.45832	1.48609	0.40271	0.16323
1.09507	0.28786	1.97343	1.50589	0.18908		Control
0.52447	1.46123	1.62169	1.28964	0.13874		vs
1.80509	1.28421	1.0307	1.64684	0.08609		SMASE 10 mUN
1.3678	0.07945	0.15354	0.66555	0.06469
1.40327	0.31409	0.68586	0.96705	0.07434		Mann Whitney test
0.32257	0.05359	1.09129	1.2968	0.04947		P value	0.0005
1.57579	0.98137	0.91795	1.33165	1.5226		Exact or approximate P value?	Gaussian Approximation
0.7006	1.15601	0.78799	0.91666	1.47498		P value summary	***
0.88092	-0.02316	1.48136	1.41466	1.31815		Are medians signif. different? (P < 0.05)	Yes
0.11554	1.1389	1.70638	0.82448	-0.20266		One- or two-tailed P value?	Two-tailed
1.18754	0.77577	0.37619	1.19953	0.70218		Sum of ranks in column A,G	6863 , 4163
1.51878	0.40631	1.08629	0.26524	1.10996		Mann-Whitney U	1817
1.69909	0.88047	0.96764	0.1133	0.44536
1.69647	0.97897	0.17223	0.10385	0.10638		Control
0.06607	0.36081	0.74017	0.07074	0.1863		vs
0.27651	0.13933	0.36191	0.92868	0.07811		SMASE 20 mUN
2.37299	1.68473	1.43216	1.08464	0.22916
0.48265	0.9745	0.94915	0.74208	0.55548		Mann Whitney test
1.89162	0.75783	1.31118	0.34058	0.4668		P value	0.0034
2.30709	0.52342	0.28751	0.27769	0.35096		Exact or approximate P value?	Gaussian Approximation
2.13361	0.20467	2.65334	1.59064	0.15705		P value summary	**
2.29462	1.74465	1.00291	0.29153	0.7953		Are medians signif. different? (P < 0.05)	Yes
0.74713	1.07307	1.81666	0.18935	0.89795		One- or two-tailed P value?	Two-tailed
0.19326	1.56234	0.11059	0.3962	0.25318		Sum of ranks in column A,H	7011 , 4924
1.46061	0.91437	0.32322	0.44384	1.01812		Mann-Whitney U	2149
1.50225	2.15082	1.17046	0.71312	0.28347
1.87242	0.55287	1.22136	1.09667	0.02856		Control
2.87849	1.27624	0.00586	0.33925	0.92994		vs
1.43155	0.1315	0.64853	0.55701	0.39457		SMASE 50 mUN
1.46732	1.43893	0.92311	1.63478	0.04719
1.74691	1.73325	0.12146	0.42078	0.26611		Mann Whitney test
0.41806	0.98495	0.79471	0.07078	0.37951		P value	< 0.0001
1.12061	0.99534	0.20141	1.41825	0.31937		Exact or approximate P value?	Gaussian Approximation
-0.00836	1.39538	1.18348	0.72762	0.07846		P value summary	***
0.05825	1.29872	0.55448	1.56616	1.46314		Are medians signif. different? (P < 0.05)	Yes
1.73411	1.52945	1.24047	1.27232	1.60908		One- or two-tailed P value?	Two-tailed
2.00283	0.16098	-0.01007	1.64377	0.52899		Sum of ranks in column A,I	7189 , 3837
1.2524	1.72611	-0.02982	0.15269	0.45093		Mann-Whitney U	1491
1.07729	1.62082	-0.04063	2.00321	-0.00234
1.85889	0.08291	-0.04566	0.91993	0.17898
1.79878	1.54493	-0.0267	0.43275	1.19448
0.09549	0.26841	-0.00887	0.13114	1.01583
0.06673	0.21952	-0.04108	0.16849	0.05126
1.66007	0.01389	-0.03373	0.0869	0.00691
0.16632	0.02919	-0.01733	1.62918	0.00905
1.23775	0.00761	-0.00708	0.41464	-0.0269
0.40835	0.04659	-0.02859	0.06466	-0.05353
1.12185	0.02913	-0.0167	0.33806	0.03103
0.10199	0.01091		0.78146
1.75219	-0.00563		1.42982
1.82516	0.00136		0.05412
1.46483	-0.00258		0.0209
0.00563	0.00547		0.05566
0.0609	0.03434		0.05097
0.0034	-0.00641
-0.0016	0.00585
0.00484
-0.000967797
-0.00263
0.03285
