# Supplementary material for: Mouse TRPA1 function and membrane localization are modulated by direct interactions with cholesterol
Source: eLife. 2019 Jun 11;8:e46084. doi: 10.7554/eLife.46084 (PMC6590989; doi:10.7554/eLife.46084)
Supplement: Figure 3—source data 1. [file elife-46084-fig3-data1.xlsx]

## Sheet: F3C
Response Amplitudes DRGs (Baseline substracted)													Statistics
CONTROL			MCD 5mM					CONTROL		MCD 5mM			AITC (30 µM) CONTROL
AITC (30 µM)	K+ (50 mM)	Caps (1µM)	AITC (30 µM)	K+ (50 mM)	Caps (1µM)			Mean	SEM	Mean	SEM		vs
0.43759	0.84179	0.42979	0.36634	0.34824	0.86714		AITC	0.50772	0.02305	0.35712	0.01978		AITC (30 µM) MCD
0.13908	0.10507	0.17398	0.46889	0.60589	0.18719		K+	0.66481	0.02498	0.60344	0.02548
0.93383	0.69951	1.07953	0.6927	0.4659	1.0413		Caps	0.95109	0.05042	0.68967	0.03228		Mann Whitney test
0.39969	0.22349	2.21089	0.04562	0.11422	0.14552								P value	< 0.0001
0.27889	0.26108	1.81279	0.59943	0.80413	0.36773								Exact or approximate P value?	Gaussian Approximation
0.82113	0.07696	1.51663	0.02025	0.30375	0.06895								P value summary	***
0.10594	0.34509	0.03554	0.39105	0.12315	1.22655								Are medians signif. different? (P < 0.05)	Yes
0.65477	0.12499	0.64657	0.45759	0.28359	0.88799								One- or two-tailed P value?	Two-tailed
0.46787	0.01724	0.08477	0.56234	0.63224	0.25644								Sum of ranks in column A,D	39857 , 28778
0.7775	0.02511	1.0273	0.08528	0.18528	0.05558								Mann-Whitney U	12130
0.2739	0.86961	0.0028	0.52992	0.63742	0.45842
0.44545	0.04156	0.70925	0.09819	0.44299	1.19219
0.71045	0.22002	1.11775	0.03418	0.36838	1.12818								K+ (50 mM) CONTROL
1.1475	0.31466	1.693	0.60721	0.65011	0.16721								vs
0.64721	1.1183	0.67181	0.54631	0.59421	0.46061								K+ (50 mM) MCD
0.80384	0.92959	0.40894	0.10916	0.22366	0.83035
0.43861	0.38474	0.10431	0.76331	0.96221	0.56511								Mann Whitney test
0.53248	0.62404	1.52338	0.59914	0.55434	0.40264								P value	0.4705
0.84872	0.2327	0.30782	0.57881	0.93461	0.31281								Exact or approximate P value?	Gaussian Approximation
0.12689	0.45425	1.40079	1.1	0.4106	1.5947								P value summary	ns
0.61816	1.0411	0.74586	0.71698	0.82028	0.59758								Are medians signif. different? (P < 0.05)	No
0.26424	1.24438	0.52984	0.31603	0.43583	0.69433								One- or two-tailed P value?	Two-tailed
0.47936	1.35303	0.72306	0.00835	0.07645	0.04745								Sum of ranks in column B,E	47828 , 21923
0.48197	1.83233	1.36487	0.04865	0.55245	0.01775								Mann-Whitney U	14540
0.74213	0.90013	1.57733	0.13069	0.32009	0.09309
0.37942	1.44404	1.04942	0.08254	0.76394	1.30144
0.31052	1.01361	0.58652	0.04368	0.53278	0.07908								Caps (1µM) CONTROL
0.35957	0.68118	0.50227	0.4077	0.51129	0.21749								vs
0.49577	0.48645	1.59968	0.40716	0.58316	0.77356								Caps (1µM) MCD
0.24834	0.82883	0.73554	0.71172	0.93252	0.49722
0.75875	0.95624	0.62435	0.22738	0.76168	0.37318								Mann Whitney test
0.06465	0.72765	1.21205	0.19255	0.57845	0.34465								P value	0.0003
0.72182	1.08005	0.66192	0.19353	0.52923	0.31733								Exact or approximate P value?	Gaussian Approximation
0.20962	1.28639	0.04872	0.1213	0.4178	0.29111								P value summary	***
0.35333	1.14492	0.28692	0.25994	0.28254	0.35284								Are medians signif. different? (P < 0.05)	Yes
0.40924	0.8704	0.95314	0.02551	0.16541	0.50361								One- or two-tailed P value?	Two-tailed
0.04566	0.69586	0.97646	0.11458	0.55198	1.44838								Sum of ranks in column C,F	34920 , 34460
0.87171	1.22941	0.46061	0.11026	0.47416	0.83476								Mann-Whitney U	13340
0.09665	1.32454	0.48885	0.38366	0.47466	0.24726
0.36692	0.66928	0.000316667	0.55953	0.65863	1.11653
0.48841	0.82201	0.83961	0.3163	0.2933	0.7595
0.10373	2.00932	0.11883	0.04036	0.03356	0.06446
0.8495	1.33002	2.0206	0.16987	0.31847	0.95567
0.76461	1.04835	0.09841	0.02615	0.49105	-0.000946667
0.40618	1.63882	0.13558	0.05772	0.43032	1.08262
0.46545	1.7782	0.52025	0.08575	0.33345	1.40685
0.60652	0.93229	1.53633	0.47385	0.50045	0.49215
0.23755	1.26649	1.70735	0.40889	0.63459	0.22839
0.3657	1.42901	0.6468	0.09633	0.53073	1.23933
0.07117	1.29536	0.64458	0.05791	0.59231	0.87881
0.12893	0.34298	2.02143	0.08984	0.70714	0.05214
0.2706	0.79299	0.01391	0.17632	1.00442	2.08012
0.4964	1.11147	1.6729	0.24666	0.41766	0.98086
0.08797	0.2887	0.51928	0.71994	1.03034	0.51014
0.14409	0.82429	0.07819	0.47489	0.50949	0.57019
0.146	1.13775	0.7515	0.31251	0.57951	0.28361
0.04762	0.76452	0.50182	0.72259	0.9293	0.4861
1.26703	1.72169	2.07713	0.60814	0.37004	0.86914
0.86312	1.81115	0.97062	0.35612	0.23452	0.36702
0.9645	2.73722	0.9599	0.58257	0.67847	0.46107
0.20561	0.76586	0.21941	0.59472	0.93452	0.39672
0.93271	0.94335	0.89661	0.60732	0.58682	0.82602
1.04378	0.6182	1.47698	0.63166	0.67716	0.60796
0.11069	0.38644	0.34869	0.72958	0.91178	0.80258
0.75784	0.88129	0.34935	0.72236	0.92216	0.72286
0.37977	0.71081	0.49537	0.87601	0.94511	0.88391
0.65403	0.35569	1.16613	0.67054	0.79214	0.86604
0.64492	0.71948	0.68132	0.61283	1.21523	0.77092
0.568	1.17815	0.2528	0.22156	0.09956	0.46996
1.5934	0.76207	2.1097	0.44851	0.65411	1.16431
0.16711	1.78148	1.81831	0.72291	0.74831	0.77531
0.48564	0.68463	0.33015	0.75581	1.25611	0.55541
0.84484	0.91192	0.54874	0.79608	1.00098	0.86708
1.11274	0.90673	1.92344	0.68069	0.90249	0.79189
0.25258	0.55154	0.24608	0.65489	1.21829	0.56209
0.46397	0.59675	1.74157	0.67129	0.82819	0.74759
0.15946	0.77795	0.35256	0.4584	1.0936	0.6745
0.11991	1.0204	1.45371	0.56016	1.16396	1.02266
0.47306	0.85433	0.58896	0.81892	1.05842	0.74022
0.2681	1.02475	0.1711	0.80023	0.88053	0.66223
0.53291	0.62101	0.61421	0.8281	1.0174	0.715
0.74435	0.16381	1.18926	0.65551	0.79701	0.69991
0.15915	0.52149	2.95415	0.49097	0.77297	0.69227
0.36119	0.02858	0.50409	0.65404	0.89294	0.76224
0.67551	0.01402	0.70451	0.3507	0.4283	0.39701
0.17838	0.53539	2.07807	0.40911	0.87621	0.29201
0.62205	0.15008	0.79505	0.62124	0.81394	0.62575
0.62023	0.40243	1.07123	0.34015	0.61685	0.32135
0.98876	0.40319	1.18896	0.4136	0.4752	0.4451
0.7708	0.31499	0.946	0.3752	0.471	0.5814
0.66242	0.72363	0.94812	0.36495	0.64195	0.34045
0.18921	0.28564	1.53891	0.10593	0.30783	-0.00867
0.80986	0.77687	0.55796	0.60562	0.57362	0.55852
0.9692	0.58907	1.0495	0.5478	0.6319	0.5414
0.88688	0.6617	1.19608	0.64653	0.62763	0.59663
0.15903	0.2935	0.27063	0.59478	0.68398	0.71028
0.33941	0.56115	0.11781	0.65163	0.72883	0.62593
2.27324	0.55375	3.26634	0.54751	0.82471	0.1145
0.92778	0.5971	0.19528	0.6083	0.9906	0.7588
0.72674	0.93971	0.50184	0.72664	0.87394	0.73184
0.48836	0.85284	0.35071	0.18739	0.28409	0.05499
0.69932	0.62721	0.11847	0.56165	0.94415	0.42735
0.93473	0.60288	0.7607	0.2713	0.333	0.4212
0.45775	1.04642	0.32679	0.54672	0.93672	0.34322
0.63752	0.39969	0.08115	0.16834	0.65643	1.45344
0.44369	1.08176	1.50747	0.0502	0.3939	0.5389
0.88486	0.29494	0.72569	0.41183	0.45943	0.54944
0.85883	0.40896	0.35582	0.06036	0.43516	0.38406
0.8675	0.26967	0.21825	0.06229	0.28279	0.89539
0.69531	0.78903	0.78615	0.54066	0.60656	0.88346
0.40014	0.39312	0.28895	0.01601	0.41111	0.42471
0.69521	0.23842	0.46344	0.02754	0.37334	0.54024
0.20322	0.20397	0.71825	0.05314	0.19444	0.30734
0.76027	0.55998	0.75461	0.2366	0.3419	0.332
0.70845	0.72924	1.73799	0.05834	0.83835	0.47415
0.15309	1.11805	0.43825	0.03626	0.84066	1.28686
0.06274	0.27775	1.63659	0.17238	0.69778	1.44448
0.72999	1.27212	0.37999	0.36638	0.60608	0.40178
0.40593	0.68162	1.13407	0.04648	0.66398	0.02278
0.44062	0.44783	0.91852	0.20661	0.14761	0.17051
0.63893	0.15004	1.5812	0.3545	-0.0551	0.8164
0.26929	0.77986	1.54864	0.01104		0.04456
0.79784	1.18731	1.55742	-0.00525		0.91459
0.24211	0.31775	1.43916	0.08375		0.53924
0.7888	0.81252	1.32481	0.09599		0.92924
0.74214	0.36211	1.608	0.01328		1.0866
0.63345	1.17003	1.00576	-0.000925		1.21885
0.09887	0.4875	1.4514	0.55042		0.66146
0.55428	1.23101	0.83515	0.05697		0.32178
0.58004	0.80778	1.09689	-0.00083		0.0731
0.46805	0.40245	1.7103	0.02583		1.5603
0.10144	0.09723	1.05675	0.74288		1.46904
0.7798	0.70165	1.32943	0.06689		0.87553
0.71893	0.5641	1.97818	0.06405		0.4051
0.31393	0.39838	0.52826	0.03789		-0.0264
0.05912	0.42323	1.39975	0.16187		-0.01779
0.52277	1.33741	1.0162	0.31259		0.74846
0.55973	0.6508	2.42183	0.39718		0.41711
0.5319	1.22618	1.92629	0.076		1.5338
0.44736	0.94759	1.06992	-0.03813		-0.00187
0.09095	0.3529	1.20545	0.0554		0.53119
0.37493	0.55302	0.64986	0.17587		1.09685
0.5891	0.86513	1.71914	0.57997		1.33994
0.68623	1.12362	0.72339	0.62073		0.18455
0.35103	1.0831	0.43261	0.48785		0.39508
0.07118	0.27141	0.96135	0.43491		0.17431
0.10994	1.16911	1.11117	0.63481		0.7365
0.69993	0.68998	0.88553	0.61732		0.07049
0.38502	0.45479	1.108	0.05643		1.11302
0.90705	1.07355	2.50861	0.6723		1.10819
0.56288	0.27427	0.85123	0.52918		0.78763
0.31142	0.60713	1.61581	0.582		0.9768
0.18491	0.95842	0.31447	0.52223		0.1126
0.58448	0.7621	1.44659	0.52646		0.5266
0.38821	0.804	0.8767	0.56361		0.40309
0.44893	0.5996	1.49449	0.79743		1.30688
0.45419	0.68875	0.36252	0.64397		1.42565
0.40446	1.29923	1.97037	0.8104		1.22965
0.21462	0.70124	1.11566	0.69555		0.85952
0.27445	0.18648	0.27788	0.66166		1.56394
0.37936	0.59877	0.20847	0.43596		1.40886
0.35008	0.14706	1.42815	0.09973		0.00342
0.23495	0.53121	1.04364	0.53622		1.24344
0.20665	0.56395	2.37053	0.45519		1.27289
0.0491	0.4626	1.75593	0.43516		1.05856
0.08076	0.40911	-0.00779	0.45962		1.31569
0.67794	0.54566	0.03561	0.39764		1.03026
0.60632	0.99215		0.17755		1.33681
0.18675	0.55669		0.17416		1.76795
0.78591	0.39171		0.09865		0.33592
0.73443	0.58298		0.08367		1.64386
0.34104	0.84335		0.02279		0.03354
0.7647	0.52183		0.01341		0.63581
0.33786	0.64776		0.01085		1.48742
0.57239	0.9983		0.14959		0.38526
0.20882	0.40112		0.0572		1.56752
0.46306	0.41381		0.02786		0.20939
0.22637	1.09866		0.0441		0.1406
0.3361	0.9006		0.03451		0.8303
0.83228	0.54328		0.16475		1.13854
0.61725	0.17833		0.00565		0.53064
0.06648	0.43211		0.04403		2.14344
0.72583	0.51594				1.43205
0.8894	0.97798				0.75557
0.70471	0.54034				1.18745
0.09169	0.26281				0.64671
0.93811	0.09447				1.34967
0.69264	0.4066				1.04417
	0.32839				1.11942
	0.08755				1.28414
	0.57017				0.00901
	0.42109				0.19459
	0.19822				0.41662
	0.14785				0.98501
	0.45165				0.26388
	0.21145				0.78909
	0.49124				0.1665
	0.58705				0.36391
	0.58641				0.96797
	0.64649				1.12898
	0.30495				1.42834
	0.67409				1.33639
	0.26979				0.20012
	0.65347				0.34889
	0.45312				0.03159
	0.6217
	0.67934
	0.62752
	0.59906
	0.7606
	0.65109
	0.62286
	0.4097
	0.43095
	0.57009
	0.5992
	0.47985
	0.55253
	0.70338
	0.39907
	0.54655
	0.5767
	0.68653
	0.63149
	0.52682
	0.50655
	0.33936
	0.64324
	0.22539
	0.34501
	0.53475
	0.45407
	0.48283
	0.6336
	0.75181
	0.48903
	0.50651
	0.19127
	0.53409
	0.4362
	0.72399
	0.15382
	0.86247
	0.52306
	0.14718
	0.09247
	0.69495
	0.37405
	0.79913
	0.73442
	0.69271
	0.10371

## Sheet: F3D
Response Amplitudes DRGs (Baseline substracted)
CONTROL			MCD 5mM					CONTROL		MCD 5mM			Thymol (300 µM) CONTROL
Thymol (300 µM)	K+ (50 mM)	Caps (1µM)	Thymol (300 µM)	K+ (50 mM)	Caps (1µM)			Mean	SEM	Mean	SEM		vs
0.0483068	0.148172	0.457042	0.0798192	0.171767	1.38625		Thymol	0.664592	0.0603367	0.356858	0.0322292		Thymol (300 µM) MCD
0.0597142	0.884581	1.59433	0.0568764	0.387601	0.224253		K+	0.495397	0.0302198	0.500909	0.0225195
0.0718229	0.70494	0.457042	0.067046	0.448017	1.07436		Caps	1.06411	0.086015	0.482161	0.0651687		Mann Whitney test
0.251624	0.814936	1.59433	0.0574807	0.292214	0.179721								P value	0.0023
0.217249	0.609425	1.17737	0.850268	0.345288	0.981714								Exact or approximate P value?	Gaussian Approximation
0.0604257	1.44497	2.25216	0.658784	0.36676	0.383618								P value summary	**
0.0752718	0.937802	1.12582	0.603975	0.285386	0.468409								Are medians signif. different? (P < 0.05)	Yes
1.65657	0.252195	2.404	0.518835	0.584733	0.47695								One- or two-tailed P value?	Two-tailed
0.111814	0.449845	0.629397	0.608186	0.404932	0.308172								Sum of ranks in column H,K	16195 , 9005
1.8501	1.01372	0.583633	0.461027	0.666114	0.143667								Mann-Whitney U	4634
0.0885173	0.242423	1.34306	0.392736	0.219133	-0.140085
0.0623384	0.386649	1.99046	0.556262	0.796386	1.37819
0.0886578	0.32174	0.335611	0.708206	0.250725	0.309636								K+ (50 mM) CONTROL
0.0532653	0.89508	0.397987	0.553681	0.84427	0.149479								vs
1.52236	0.549631	1.17737	0.955713	0.824065	0.785475								K+ (50 mM) MCD
0.0583077	0.723067	2.25216	0.671161	0.828314	0.466773
0.0939356	0.175692	1.12582	0.17061	0.518835	0.830926								Mann Whitney test
1.15663	1.0448	2.404	0.0649231	0.523534	0.139574								P value	0.379
0.208943	0.696071	0.629397	0.127853	0.667774	0.138435								Exact or approximate P value?	Gaussian Approximation
0.531341	1.45558	0.583633	0.211561	0.362613	0.284779								P value summary	ns
3.12738	0.458851	1.51009	0.0927658	0.652378	-0.0122976								Are medians signif. different? (P < 0.05)	No
1.09064	1.08124	1.92942	0.0570789	0.550286	0.658942								One- or two-tailed P value?	Two-tailed
0.0488849	0.134427	0.727047	0.0515682	0.565609	0.601718								Sum of ranks in column I,L	17084 , 16846
1.24318	0.980974	1.78384	0.0603099	0.82967	0.496531								Mann-Whitney U	7904
0.900898	0.785161	1.03141	0.295152	0.837487	0.488425
0.662508	0.906439	0.679459	0.140142	0.267674	1.34672								Caps (1µM) CONTROL
0.263115	0.229771	1.06695	0.625751	0.691395	0.344683								vs
0.0460412	0.435106	0.562615	0.663808	0.956011	0.701479								Caps (1µM) MCD
0.503244	0.601383	1.37159	0.175401	0.794103	0.137659
0.810881	0.222774	1.32594	0.0506425	0.800734	0.19757								Mann Whitney test
0.135549	-0.0570639	0.832546	0.809458	0.409696	0.543025								P value	< 0.0001
0.0913639	-0.00257671	0.984431	0.399302	0.181857	0.641455								Exact or approximate P value?	Gaussian Approximation
2.30392	1.10167	0.671705	0.248554	0.200354	0.157923								P value summary	***
1.64046	0.978084	0.996212	0.69836	0.688983	0.310909								Are medians signif. different? (P < 0.05)	Yes
1.43232	0.453387	2.03738	1.02128	0.142872	0.290589								One- or two-tailed P value?	Two-tailed
0.0645634	0.593502	0.686636	0.829231	0.48884									Sum of ranks in column J,M	2676 , 979
0.770972	0.495041	0.68138	1.02848	0.649404									Mann-Whitney U	349,0
0.908608	0.680583	0.59521	0.896805	0.0555906
1.79621	0.0885355	0.794803	0.373497	0.437852
0.337876	0.941809	0.333577	0.155939	0.22602
0.057958	0.154589	0.0135043	0.19405	0.908751
1.22629	-0.056264	0.759691	0.108933	0.546397
0.244584	0.223875	1.5692	0.0585241	0.684091
0.517535	0.148075	0.450191	0.0861594	0.407961
0.144994	0.70852	1.55284	0.120543	0.425523
2.76033	0.0307537	0.797365	0.0546726	1.13435
0.102745	1.38824	0.27754	0.0752774	0.528817
0.810529	0.01133	1.15876	0.167183	0.214305
0.758511	1.87374	0.40188	0.676273	0.24242
0.154106	0.249521	1.10776	0.143735	0.548532
0.0908922	-0.00188856		0.770893	0.110433
0.0680925	0.0761264		0.29382	0.469131
0.169528	0.501702		0.216562	0.285117
0.179219	0.871175		1.07461	0.719828
0.305815	0.223551		0.253993	0.525553
0.95477	0.0570388		0.63986	1.06315
1.22285	0.342867		0.056576	0.883584
0.263866	1.03158		0.674535	0.786487
0.105625	0.0383627		0.425273	0.999116
0.0718436	0.970094		0.0711363	0.211299
0.129256	0.0546375		0.546371	0.585576
0.231062	0.111065		0.284697	0.492032
0.205272	-0.0219985		0.0531436	0.753486
0.136434	0.0522751		0.088494	0.343443
0.133701	1.19019		0.0749107	0.423773
0.384602	0.00487415		0.71867	0.327625
0.893926	0.251913		0.326138	0.858957
0.120354	0.563701		0.353595	0.257348
0.0590542	0.611779		0.319427	0.370569
0.545838	0.53326		0.536013	0.677485
0.194151	0.354867		0.432858	0.45923
2.57274	0.364386		0.492125	0.554906
0.654922	1.08682		0.22546	0.187354
0.469253	0.122914		0.0116589	0.454279
0.623139	0.419009		0.0770804	0.348725
0.384602	0.606696		0.0531616	0.279572
0.893926	0.251913		0.0980276	0.368974
0.120354	0.563701		0.0590999	-0.245056
0.0590542	0.611779		0.026739	0.387958
0.545838	0.53326		0.0384306	0.465422
0.194151	0.354867		0.0227143	0.617911
2.57274	0.364386		0.126635	0.44651
0.654922	1.08682		0.372475	0.229054
0.0508634	0.122914		0.376299	0.568477
0.0481827	0.498972		0.57797	0.668834
0.780219	0.27031		1.31058	0.82925
1.59218	0.81201		1.09521	0.485064
0.681752	0.27031		0.315792	0.184729
1.17719	0.81201		0.34293	0.38451
2.4607	0.491926		0.18876	0.455654
0.881807	0.776527		0.0995874	0.464332
0.446826	0.520795		0.114243	0.503837
0.320011	0.602427		0.217358	0.386209
0.922759	0.417009			0.544696
0.137406	0.287397			0.59688
0.780219	0.483811			0.272269
1.59218	0.539638			0.296545
0.681752	0.714778			0.368664
1.17719	0.195387			0.648042
2.4607	0.491926			0.518124
0.881807	0.776527			0.351647
1.70201	0.520795			0.257168
1.58757	0.602427			0.0914935
0.165657	0.417009			0.200777
1.5693	0.287397			0.542087
0.797868	0.443955			0.177442
0.812415	0.485613			0.456633
0.153648	0.412102			0.87542
0.150438	0.486531			0.802566
0.434689	0.290872			0.599926
0.43976	0.097269			0.425015
0.101131	0.256038			0.277952
1.12216	0.21823			0.11584
1.08486	0.4112			0.362143
0.223357	0.445495			0.64344
1.15403	0.570733			0.473507
0.700531	0.81411			0.787025
0.144312	0.4172			0.425278
0.854297	0.247198			0.92577
0.0917333	0.554792			0.587321
0.445251	0.200257			0.615424
0.126127	0.437018			1.145
0.440957	0.681449			1.06906
1.67748	0.311181			0.436411
0.0973943	0.12987			0.237851
0.130626	0.738021
2.13807	0.335644
0.249345	0.176382
1.15585	0.190258
0.4249	0.434314
0.376801	0.546445
	0.447887
	0.464804
	0.11877
	0.826146
