# Supplementary material for: Mouse TRPA1 function and membrane localization are modulated by direct interactions with cholesterol
Source: eLife. 2019 Jun 11;8:e46084. doi: 10.7554/eLife.46084 (PMC6590989; doi:10.7554/eLife.46084)
Supplement: Figure 5—source data 1. [file elife-46084-fig5-data1.xlsx]

## Sheet: F5A
mTRPA1-mCherry										mTRPA1-mCherry						mTRPA1-mCherry/ MCD 10 mM									mTRPA1-mCherry/ MCD 10 mM
Response Amplitudes (Baseline substracted)										AITC Concentration (µM)	Mean Response Amplitude	SEM				Response Amplitudes (Baseline substracted)									AITC Concentration (µM)	Mean Response Amplitude	SEM
0.1	0.5	1	5	10	50	100	300	800		0.1	0.000418812	0.00375				0.5	5	10	50	100	300	800			0.5	0.00645	0.00811
-0.02851	-0.00517	-0.000636667	0.4509	0.4509	0.17605	0.58833	0.82298	0.4615		0.5	0.0045	0.00216				-0.01859	0.000366667	-0.03693	0.86761	0.34256	0.0623	-0.00397			5	0.00845	0.00537
0.02815	0.01187	0.01071	0.37034	0.37034	0.20665	2.05872	1.73439	0.90381		1	0.09296	0.01796				-0.01878	0.10013	0.22614	-0.05364	0.06272	0.08575	-0.01384			10	0.05381	0.01443
0.03879	0.00666	-0.00467	0.39714	0.39714	0.02174	1.58107	0.9321	2.04776		5	0.26063	0.02204				-0.00919	0.04272	-0.0237	0.03778	0.69361	1.41447	-0.0258			30	0.13597	0.02348
0.00727	0.01115	-0.00432	0.28491	0.28491	1.56522	0.65977	0.29772	1.27233		10	0.40636	0.03273				-0.01005	-0.01227	-0.07839	0.23315	0.15062	1.55438	0.04267			100	0.18399	0.02923
-0.000123333	0.05747	-0.01163	0.02662	0.02662	0.77416	0.63939	1.68703	1.24344		50	0.55556	0.03593				0.04058	0.00396	-0.02411	0.11153	0.05963	0.49174	0.1896			300	0.30105	0.0302
0.03311	-0.000926667	0.02703	0.09316	0.09316	1.49947	2.87856	0.32769	1.9471		100	0.69738	0.04691				-0.003	-0.00407	0.16767	-0.00344	0.10905	0.07853	0.4276			800	0.30142	0.03947
0.02865	0.00866	0.000776667	0.26112	0.26112	0.89785	2.21553	0.58311	0.05122		300	0.75479	0.06188				0.2001	0.00556	0.03076	0.00302	0.14959	0.79779	0.00982
-0.09656	0.06386	-0.00934	0.40919	0.40919	0.02189	0.06846	0.67748	1.60574		800	0.77352	0.06069				-0.00245	0.00381	0.20476	-0.01526	0.20028	0.786	-0.01599
0.00211	-0.05354	-0.00255	0.75998	0.60283	0.07573	0.17589	3.10836	0.76757								-0.00346	0.03462	0.04065	-0.00132	0.63999	0.75861	0.69408
0.01262	0.00965	0.00896	0.60283	0.01125	-0.01373	0.65358	1.48006	0.62304								0.02877	0.08578	0.00812	0.00433	0.11057	0.35707	0.24344
0.02566	0.01037	-0.00713	0.01125	0.0726	0.31288	0.55792	3.12277	2.7421		Fit						-0.03036	0.000856667	0.1185	0.05608	0.12762	0.10571	0.02705			Fit
-0.06116	0.01997	-0.01615	0.0726	0.00784	1.43829	2.25685	1.03493	0.34378		Model	Hill					0.09985	0.00157	0.00793	1.02569	0.26596	0.66933	0.00252			Model	Hill
0.00878	-0.00383	-0.02653	0.00784	0.74308	1.43908	1.78556	1.47717	2.14842		Equation	y=Vmax*x/(k+x)					0.01103	-0.00692	-0.00759	0.1639	0.34946	0.13246	1.3313			Equation	y=Vmax*x/(k+x)
-0.02487	-0.04067	-0.01456	0.74308	0.13086	0.91405	-0.00698	0.08642	0.83334		Reduced Chi-Sqr	0.00134					-0.06841	0.0424	0.23849	0.07056	0.51323	0.24528	0.70462			Reduced Chi-Sqr	0.00043
0.01909	0.00896	-0.00566	0.13086	0.02469	0.41224	2.22897	1.60316	0.41104		Adj. R-Square	0.98841					-0.0233	0.07548	0.02768	-0.03372	0.05222	0.29667	0.70894			Adj. R-Square	0.9778
0.0291	-0.02922	-0.01974	0.02469	0.06892	0.15888	0.24046	-0.0485	0.21695			Value	Fit Error				-0.04499	-0.04011	-0.0066	0.58812	0.08371	0.07496	0.21475				Value	Fit Error
0.00829	-0.05583	-0.00496	0.06892	0.12617	0.17408	1.29618	1.1228	1.86692		Vmax	0.76035	0.02323				-0.05008	-0.04267	0.08702	0.01873	0.05159	0.08255	0.14303			Vmax	0.33122	0.02133
0.04179	-0.09872	0.03202	0.12617	0.25732	0.91075	0.94696	1.47389	0.00797		k	10.08	1.55				-0.00661	-0.05068	0.20519	0.08365	0.10285	1.00282	0.06493			k	56.44	13.82
-0.00438	0.01732	0.03095	0.25732	0.36567	1.15247	0.07151	0.15115	1.87622								0.000643333	-0.06324	0.04813	-0.03075	0.09846	0.48358	-0.00658
0.0051	-0.01043	0.0073	0.36567	0.56619	1.3318	2.01304	0.7928	0.03908								-0.00967	-0.03698	0.04433	0.07366	0.20615	0.63697	-0.01105
-0.03994	0.02893	-0.01511	0.56619	0.53147	2.04952	1.58782	0.17738	1.8714								-0.00571	-0.04489	0.11096	0.02189	0.13329	0.21901	0.00138
0.02444	0.000423333	-0.00266	0.53147	0.09375	0.14659	0.05835	0.81236	1.60139								0.09592	-0.04074	0.00265	0.02554	0.07157	1.00318	2.11131
0.01732	-0.0051	-0.01748	0.09375	0.20416	0.45675	0.18317	0.2111	1.5811								-0.01131	-0.02758	-0.00652	1.14405	0.30868	0.36673	1.89121
0.03856	0.00079	-0.01272	0.20416	0.23931	1.66888	0.17181	0.22141	0.45753								0.0061	-0.03376	0.05021	0.25893	0.06122	0.62401	0.14317
0.00505	0.00273	-0.02412	0.23931	0.16529	0.12861	2.19149	1.59014	0.42216								-0.01375	0.00201	-0.00831	0.68942	0.54185	1.26158	1.30588
0.02524	-0.03329	0.00972	0.16529	1.75473	1.91161	2.37409	0.43037	0.01682								-0.12116	-0.01409	0.03607	0.108	-0.01095	0.97353	0.30584
-0.00315	0.00396	0.01027	0.52431	0.52431	0.24367	0.27161	1.56526	0.23388								-0.0079	0.03571	-0.03244	-0.06994	-0.02254	0.37718	0.0011
0.01502	0.00768	-0.00149	0.68403	0.68403	0.02827	0.000273333	1.0967	0.30961								-0.09597	0.06091	0.06811	0.32679	0.26477	0.61464	0.54007
0.01424	-0.0014	-0.00448	0.30367	0.30367	1.44793	0.33196	0.84121	0.66015								0.09772	0.08397	0.01237	0.05795	0.24687	0.09068	0.3455
-0.00342	-0.00046	-0.02892	0.58224	0.58224	0.18948	1.29483	0.56859	0.99362								0.1032	0.000513333	0.0967	0.23807	-0.04094	0.01758	0.02849
0.03445	-0.0029	0.00965	0.00318	0.00318	0.35321	2.15979	-0.000293333	1.17247								0.13145	0.10098	0.09968	0.24443	0.89679	-0.02974	0.06341
0.01457	-0.02224	-0.00229	0.70939	0.70939	0.98672	2.81329	1.45566	0.30689								-0.02651	0.00565	0.04505	0.03146	0.94923	1.0046	0.04311
0.0013	0.00284	0.00112	1.13156	1.13156	1.71106	2.51809	0.03537	1.33821								-0.01245	0.01309	0.21413	0.14395	0.31731	0.14148	0.23267
0.01908	0.01106	0.00696	0.83886	0.83886	0.00551	0.8051	1.0436	0.73401								0.0113	0.00241	0.000656667	-0.02743	-0.01329	0.35183	0.24097
0.02016	-0.00213	-0.01578	0.08784	0.08784	1.32935	2.1529	1.9717	1.59057								-0.05332	0.0214	0.25371	-0.03227	0.34247	0.25167	0.19353
0.01009	0.05309	-0.00811	0.02303	0.02303	1.0564	1.03735	1.48859	0.21174								0.07227	0.00831	0.014	-0.02574	-0.10385	0.07897	0.09068
0.00842	0.00317	0.01212	-0.00699	-0.00699	2.14929	0.19326	0.37953	0.07988								0.11822	0.02799	0.01568	-0.01126	-0.00598	-0.0046	0.01758
0.01243	-0.02147	-0.02625	0.04801	0.04801	1.12452	2.0118	0.09381	0.08846								0.06558	0.01919	0.01612	0.48745	-0.00581	0.00469	1.0046
0.02038	0.00123	0.00435	-0.00211	-0.00211	0.92746	1.85551	1.08153	0.37618								-0.09809	-0.01321	0.00443	-0.01047	0.05139	0.27517	0.14148
0.00419	0.000743333	-0.00739	0.62036	0.62036	0.41371	1.55028	0.17697	1.41154								-0.0022	-0.00733	-0.00547	0.78918	3.33333e-05	-0.00789	0.35183
0.01569	-0.03883	-0.02694	0.76914	0.76914	1.41427	0.38299	0.03393	1.35338								0.05061	0.00439	-0.00646	0.07815	0.00052	0.57141	0.25167
0.00757	-0.01005	0.2698	0.4166	0.4166	0.58832	1.61455	0.03397	0.05134								0.021	0.02403	0.78125	-0.00707	0.15171	0.31804	0.07897
0.00887	0.00163	0.15039	0.63987	0.63987	1.67212	0.70862	0.64363	0.65054								0.00322	0.00388	0.000703333	-0.0062	-0.03214	0.18951	-0.0046
0.00183	0.00148	0.68604	0.86042	0.86042	0.00602	0.6993	0.1064	1.24767								0.01554	0.00265	-0.04296	-0.04081	0.05049	-0.02273	0.00469
0.00479	-0.00948	0.13802	0.56923	1.11414	0.25734	-0.00329	0.13847	1.06054								0.05536	-0.00119	0.00645	0.0468	0.47966	0.02281	0.27517
-0.00761	-0.00918	0.12892	0.5892	0.56923	0.51497	1.2251	0.65044	1.66479								0.03977	-0.00936	-0.00367	0.28876	-0.03103	0.71351	-0.00789
0.00517	0.00282	0.07663	0.02532	0.5892	0.02891	0.21746	3.06051	0.3139								0.16499	0.0102	-0.04054	0.20446	-0.01692	-0.01092	0.57141
-0.0036	-0.00717	0.26544	0.9131	0.02532	0.17455	-0.00354	1.86349	0.53836								-0.04568	0.0023	-0.0286	0.00362	0.82139	0.33042	0.31804
0.01022	0.03617	0.01741	0.00322	0.9131	0.04779	0.13729	1.49608	0.23165								0.01539	0.1244	-0.01948	0.10185	0.01461	0.12478	0.18951
0.01903	-0.02207	0.12636	1.15484	0.00322	0.03405	0.73687	1.21474	0.90704								-0.04186	-0.005	-0.0177	-0.00443	-0.01826	0.11301	-0.02273										-0.01701
-0.04747	-0.00315	0.53578	0.13944	1.15484	0.07376	1.55494	1.60866	1.2415								-0.01936	-0.01533	-0.03307	0.13018	1.47568	0.20952	0.02281										-0.01528
0.06272	-0.0012	0.03216	0.00817	0.13944	0.79592	1.85726	0.56126	1.02166								0.00362	-0.01004	0.10208	0.00278	0.01072	0.65232	0.71351										-0.00222
0.04043	0.02314	0.04434	0.16506	0.00817	1.13954	2.09693	1.98505	0.07628								-0.01629	-0.01313	-0.00411	0.46188	0.49712	0.38406	-0.01092										-0.00556
0.02588	0.00682	0.45023	-0.01893	0.16506	0.83483	1.95067	0.59807	0.85614								-0.01077	-0.00239	0.08514	0.01797	-0.00269	0.34179	0.33042										-0.00222
0.00102	0.00475	0.28165	0.32105	-0.01893	0.00701	1.37958	0.70187	0.91048								0.03342		-0.00761	0.22003	-0.01762	0.15093	0.12478										-0.01358
0.00665	0.00345	0.28987	0.10888	0.32105	0.25083	0.85719	0.3468	0.34596								-0.02357		-0.01175	0.35462	0.000503333	0.07833	0.11301
0.0054	0.02943	0.52525	0.26099	0.10888	0.88258	0.24836	0.23816	0.00704								-0.01406		-0.01722	-0.01329	0.16646	0.36973	0.20952										-0.00105
0.02176	0.02799	0.43352	0.17622	0.26099	0.39061	0.0432	0.08792	-0.01747								0.16224		-0.0266	0.02309	0.04252	0.21651	0.65232
0.01574	0.02096	1.45409	0.35441	0.17622	0.62374	0.00184	0.09174	0.64064								0.00364		-0.04438	0.000366667	0.21822	0.41294	0.38406										-0.00521
1.66667e-05	0.02643	0.12347	0.45413	0.35441	0.4603	0.60155	0.55039	0.80357								-0.04457		-0.04607	-0.01632	0.20383	0.1179	0.34179										-0.00367
-0.0254	0.00671	0.09407	0.33657	0.45413	0.93808	0.54737	0.66067	0.34191								-0.06746		-0.02952	-0.01882	0.00455	0.22676	0.15093
-0.01701	0.01109	1.05871	0.32846	0.33657	0.38563	0.68813	1.37486	0.08586								-0.12615		-0.04308	0.05962	0.08435	0.09757	0.07833										-0.00598
-0.02986	0.00735	0.65325	0.01472	0.32846	0.0662	0.5287	0.21996	0.91462								-0.06915		-0.03768	0.06138	0.14089	0.14446	0.36973										-0.00537
-0.04623	0.02392	0.55162	0.09277	0.01472	0.00692	1.06827	0.50787	0.59734								-0.01273		-0.05036	0.06814	0.29409	0.62629	1.58945										-0.01002
-0.04179	-1e-05	1.00849	0.05224	0.09277	1.52912	0.57332	1.05088	1.64598										0.31829	-0.02423	0.06941	0.04872	0.21651
-0.01401	-0.01884	0.44156	0.03596	0.05224	1.22063	1.45945	0.77059	1.0875										-0.0237	-0.03371	0.05859	0.1696	0.41294										-0.00787
0.00958	0.00508	0.41432	0.11173	0.03596	-0.00265	0.0895	0.51967	0.77037										-0.01725	-0.03399	-0.04413	0.00625	-0.00761
-0.000973333	0.00269	0.3239	0.04208	0.11173	0.95974	0.11415	1.61784	0.36014										-0.01396	-0.04153	0.11939	0.14559	0.1179										-0.0078
0.01891	0.03293	0.39727	0.78706	0.04208	0.08663	0.96349	0.07336	0.20103										-0.01422	0.2063	1.04996	-0.00482	0.22676										-0.01061
-0.00653	-0.000763333	0.38693	0.3928	0.78706	0.20751	0.6156	0.95192	1.37347										-0.02012	0.00839	0.0097	0.0487	-0.01637										-0.000816667
-0.05623	0.0017	0.23327	0.46544	0.3928	0.56514	-0.01321	1.07265	1.35026										0.2678	0.22574	-0.00964	0.26051	0.09757
-0.0153	0.0032	0.23392	-0.01517	0.46544	0.82895	0.04333	0.00552	0.95825										-0.02891	-0.0602	0.02122	-0.00182	0.14446
-0.00926	0.01686	0.10743	-0.00223	0.000816667	0.35476	0.66127	0.71392	0.34857										-0.02535	0.05506	0.02053	0.68516	0.62629										-0.00881
-0.17441	0.00031	0.06455	0.66146	0.03131	0.53172	0.67133	0.89814	0.75056										-0.00346	-0.01385	0.01443	0.39061	-0.00732										0.00223
-0.00172	0.00202	0.0584	1.99262	0.32016	0.3551	2.00707	0.03619	0.14847										0.03526	0.0349	0.00462	0.07009	-0.02466										-0.00403
-0.0275	0.00851	0.19341	0.02189	0.45756	0.57525	0.05516	1.74531	0.3245										0.02966	0.01531	0.36264	-0.01936	0.04872										-0.00567
0.10079	0.03925	0.27024	0.06943	0.60375	0.07091	1.11112	1.44449	0.63507										0.01113	0.27994	0.95907	0.2867	0.1696										-0.00402
-0.000506667	0.000856667	0.35815	0.05536	0.50492	-0.01014	0.20046	0.15822	2.15186										0.50639	-0.01346	0.44435	-0.01275	0.00625										-0.00283
-0.00507	0.02238	0.07958	0.17965	1.56941	0.31626	0.09318	1.22127	1.52226										0.5405	0.01266	0.46618	0.52728	-0.01369										-0.0235
-0.06369	0.00719	0.12278	-0.03448	1.25914	0.13343	0.72185	0.16907	0.08359										-0.00973	0.47894	0.07989	0.46218	-0.00482										-0.000873333
0.0069	0.01043	0.08112	-0.000576667	1.72646	0.10314	2.11787	-0.00871	0.48254										0.05903	0.32806	0.00415	-0.00841	0.26264										-0.01368
-0.01323	0.02547	0.06976	0.0706	0.17101	0.86438	1.91224	0.75225	0.16681										-0.01034	0.16371	0.03005	0.83613	0.0487										0.000143333
-0.0052	0.0253	0.35558	0.27868	0.07456	0.07586	0.14286	0.00703	0.30439										0.0152	0.54346	0.01632	0.32507	-0.01915										-0.00797
0.02281	0.00558	0.05571	-0.00288	0.11166	0.44885	0.03876	0.30344	1.01532										0.01826	0.01157	0.12189	-0.000523333	0.01464										-0.00914
0.05441	0.02974	0.21707	0.02088	0.05178	0.24232	0.43282	0.4954	2.22078										-0.00087	0.11735	0.01226	0.33985	0.86172										0.00141
-0.00378	0.02017	0.07113	0.02309	0.37051	0.5414	1.8852	0.03618	1.35823										0.00049	-0.04739	-0.02217	0.13016	0.14469										-0.00383
0.01791	0.0153	0.04261	0.05325	0.95094	0.31677	0.12298	0.42821	0.39836										0.2175	0.28596	0.01863	0.83457	0.22288
-0.00953	0.013	0.00649	0.3286	0.31236	0.95521	0.2496	1.25768	0.64384										-0.05376	0.04637	-0.02458	0.16364	0.21808										-0.01423
0.09788	0.01294	0.00105	0.08325	0.07602	0.67677	0.91503	0.2314	0.5012										0.85221	-0.02084	-0.02163	-3.33333e-06	1.31587										-0.00887
-0.09228	0.00614	0.00116	-0.00707	0.36874	1.18801	0.36824	0.26116	0.68653										0.0824	-0.00493	-0.00131	0.41061	1.07477										-0.00273
0.02698	0.03642	0.00731	0.02141	0.18991	1.26947	0.10254	0.33442	0.50841										0.02553	-0.02435	0.08374	0.05288	1.70079										0.01956
-0.11482	0.00783	-0.04234	0.00519	0.3399	0.63334	-0.00141	1.69663	0.64099										0.06984	0.14029	0.27304	0.15292	0.23258										-0.00603
0.00034	0.00271	0.02911	0.19757	0.3234	1.4243	0.02163	0.25261	0.85504										-0.01497	0.00269	0.10407	-0.01181	0.48177										-0.01686
-0.04748	0.02886	-0.01026	0.85369	-0.00126	0.48503	1.98665	0.74344	0.14948										-0.01558	0.32236		0.18286	0.28918										-0.00072
0.01991	0.00123	0.00462	0.02884	0.82306	0.14715	-0.000235484	0.27542	0.55615										0.18017	0.01959		0.27907	-0.00479										-0.00595
0.01305	0.01706	-0.00367	-0.00263	-0.03164	0.59961	0.95301	0.51544	-0.01925										-0.01025	0.45248		0.0097	0.28729										-0.00126
0.06015	0.00239	-0.00086	0.17151	0.12108	0.23923	-0.01177	0.76774	0.41665										0.0725	0.25601		-0.02149	0.15667
-0.01989	-0.01961	0.00608	0.19001	0.13958	-0.00017	0.06301	0.08917	0.11292										-0.02092	0.15627		0.33103	0.52505										-0.00686
0.00516	-0.000406667	0.01304	-0.0441	0.18248	-0.02223	0.08646	1.83709	0.52043										-0.03877	0.00962		-0.0193	0.40246										-0.00622
-0.0407	0.00187	0.00228	-0.00967	0.33183	0.0451	0.17024	0.64268	1.32397										-0.00693			-0.02877	1.12187										-0.00635
-0.03552	0.00225	-0.11397	0.6319	0.29024	0.1828	0.80962	0.60268	0.36017										-0.03054			0.90324	0.38705										-0.00554
	0.00985	-0.00758	-0.04278	0.02015	0.15795	0.38172	0.0459	0.13563										0.01942			-0.01464	-0.04211										0.02104
	-0.00239	-0.02084	0.02666	-0.00914	0.28701	0.01815	1.20264	0.13248										-0.01754			0.04075	0.00652										0.01478
		-0.02441	0.86201	0.03589	0.32157	-0.04107	0.56013	0.12951										-0.0072			0.01292	-0.02425										-0.0046
		-0.04368	0.01202	-0.06637	0.11157	0.43912	0.84004	1.19545										-0.01068			1.16373	-0.07744										-0.00567
		-0.01801	0.0542	-0.03383	0.88264	0.87472	0.90332											0.04652			0.56762	-0.07772										-0.00622
		-0.02743	0.01605	0.08838	0.24952	-0.00237	0.63868														-0.01575	0.11611										-4.66667e-05
		-0.01428	0.0423	0.32641	0.12776	0.7343	0.96317														-0.15698	0.68435										0.01222
		-0.0033	0.03377	0.41686	0.09275	0.81833	0.0742														0.54475	-0.02197										-0.00733
		-0.02106	0.53085	0.13533	1.04248	0.24137	0.89272														0.39681	0.5629										-0.0141
		-0.02777	0.00446	0.2762	1.7113	1.35058	0.0957														0.02153	0.51508										-0.00952
		0.0184	-0.01552	0.05137	0.38103	0.03499	0.0284														-0.02106	-0.02667										-0.00802
		0.11357	0.53016	0.36161	0.61719	0.49885	0.11117														0.0214	0.4343										0.00087
		0.00202	0.04999	0.00432	0.96912	0.47165	0.0634														0.0322	-0.01875										-0.00176
		-0.0068	0.37622	0.01336	0.06448	1.31082	0.51055														0.40733	0.08829										-0.06367
		-0.02021	0.92808	0.90305	0.09535	0.10635	0.65015														0.41858	0.06151										-0.01739
		0.000956667	0.35636	0.16889	1.49415	0.01469	0.14104														0.47363	1.32232										-0.0039
		-0.04831	0.55234	0.71258	1.10535	0.69213	0.89051														-0.00235	0.12291										-0.0235
		-0.032	-0.01401	0.22858	1.52465	0.08821															0.72078	0.02091				--						-0.00356
		-0.00232	0.56084	-0.05212	0.40466	0.34925															0.07606					--						-0.0298
		0.00586	0.21825	-0.01197	-0.00673	0.73225															0.1404					--						-0.00726
		-0.17449	-0.01393	0.00386	0.04897	0.96993															-0.01596											0.00953
		0.04172	0.28666	0.02728	1.19629	0.01387															0.81149											-0.00715
		0.14794	1.36184	0.64102	1.24628	0.29042															0.2369											-0.01646
		-0.10896	0.29931	1.06879	2.00384	0.3911															0.00028
		0.07502	0.12257	0.28173	0.20545	0.24809															0.03822											-0.02378
		-0.11123	0.36342	0.08634	2.44124	0.33845																							--			0.00776
		0.08623	0.1948	0.02164	1.68872	0.08926																							--			0.00399
		0.02739	0.04611	0.16634	1.58158	1.44531																							--			0.000123333
		-0.00524	0.12599	-0.04282	0.17709	2.01272																							--			-0.0181
		-0.00143	0.11452	0.88108	-0.00534	1.23279																							--			-0.01693
		0.02417	0.24689	0.54205	0.58871	0.59738																										-0.00502
		-0.03536	0.01495	0.21339	1.11027	0.41674																										-0.00422
		-0.081	0.18143	0.16113	0.66619	1.23892																										-0.00314
		-0.00662	0.0971	0.83494	2.00069	1.68207																										-0.01357
		0.03855	0.06982	0.72473	0.21277	0.41038																										-0.06278
		0.12276	-0.01475	1.54036	-0.01537	0.72461																										0.00542
		0.20438	0.49058	0.18953	-0.01288	1.46206																										-0.03726
		0.00609	0.10265	-0.01342	-0.01362	0.18033																										-0.02432
		0.01912	0.32366	0.56612	-0.01853	1.20275																										-0.04471
		0.04068	0.04712	0.00545	0.01894	0.06308																										0.00299
		-0.01842	0.06967	0.7493	0.08402	-0.03576																										-0.00622
		0.03563	0.0133	0.04015	0.58798	2.00835																										-0.03862
		-0.02215	0.16499	0.34662	0.12777	0.19868																										-0.00639
		-0.01519	0.23105	0.9867	0.11777	0.61773																										-0.00577
		-0.01141	-0.000853333	0.64713	0.10919	0.11761																										0.00212
		0.04834	0.30925	-0.02212	0.12931	0.9266																										-0.02721
		-0.02242	0.13972	-0.02153	0.29658	0.26443																										-0.02343
		-0.000749211	0.26833	0.18693	0.1201	1.52208																										-0.02464
			0.19172	0.76342	0.53261	1.48538																										-0.01979
			0.05996	-0.00526	0.78667	-0.02302																										-0.02959
			0.19084	0.3401	0.70236	-0.000406452																										-0.03545
			1.45834	0.11744	0.5733	-0.02537																										-0.01813
			0.09884	-0.09994	0.09651	0.14334																										-0.00583
			0.09896	0.46158	1.26957	0.05558																										-0.02107
			-0.04851	0.23249	0.50937	0.04445																										-0.02175
			0.21595	0.32177	0.27106	0.15962																										-0.00504
			0.21958	0.13881	0.20418	0.05822																										-0.03646
			0.22567	0.0584	0.49438	1.05612																										-0.04596
			0.06112	0.3365	0.00878	0.68095																										-0.02919
			0.05738	0.13453	0.89705	1.33835																										-0.00753
			0.06305	-0.01279	0.83427	0.01233																										-0.00984
			0.17316	0.04411	0.25691	0.86732																										-0.01052
			0.21	0.07569	0.39316	1.50195																										-0.000124792
			0.45023	0.52863	0.23397	1.35761
			0.28165	0.8587	0.03414	0.17477																												--
			0.28987	0.03897	0.5291	0.90215
			0.52525	0.30103	0.01858	0.93726
			0.43352	0.38459	0.38241	0.83251
			1.45409	1.30257	0.03774	1.09187
			0.12347	0.10096	1.01581	1.42968
			0.09407	1.15983	1.48121	2.11904
			1.05871	0.79382	0.51596	1.5628
			0.65325	0.58426	0.19702	2.16526
			0.55162	0.08556	0.47051	1.63333
			1.00849	0.72976	0.15359	2.17296
			0.44156	0.85148	0.70047	0.34623
			0.41432	0.25908	0.44293	0.54624
			0.3239	1.16204	0.28535	0.15735
			0.39727	1.28464	0.5227	0.10657
			0.38693	1.08403	1.11997	0.50262
			0.23327	1.27206	1.01417	0.1598
			0.23392	0.0752	0.46381	1.45425
			0.10743	0.72013	0.6988	0.08735
			0.06455	1.33829	0.66876	0.08407
			0.0584	0.08531	0.0347	0.05505
			0.19341	1.7807	0.63093	0.2454
			0.27024	0.20661	0.03775	0.04992
			0.35815	1.55133	0.26162	0.06718
			0.07958	1.08545	0.28119	1.01571
			0.12278	0.1061	0.41962	0.40365
			0.08112	2.15328	0.07267	0.0204
			0.06976	1.47862	0.56241	-0.02261
			0.35558	0.21587	1.34912	0.0689
			0.05571	1.9524	1.08994	0.20695
			0.21707	0.07334	1.08981	0.04057
			0.07113	2.20895	0.46673	-9.67742e-05
			0.04261	0.31865	0.64038	0.00253
			0.00649	-0.03349	0.70653	0.03267
			0.00105	-0.0192	0.09154	-0.07252
			0.00116	-0.00564	0.25997	0.5335
			0.00731	-0.02437	1.12495	0.00481
			-0.04234	-0.00855	0.07903	0.00221
			0.02911		0.08408	0.00213
			-0.01026		0.00844	-0.01838
			0.00462		0.3531	0.00788
			-0.00367		0.36044	0.01078
			-0.00086		0.27349	-0.15158
			0.00608		0.09459	-0.02566
			0.01304		0.73013	0.93039
					-0.0195	0.08603
					0.0984	0.01627
					0.24281	0.00509
					0.71326	-0.00557
					0.32019	0.41377
					0.11907	0.70456
					0.00822	1.07251
					0.73766	-0.00263
					-0.000493333	0.00822
					0.59968	1.31434
					0.17952	0.07685
						0.60065
						0.48295
						1.29881
						0.69899
						0.93801
						0.882
						0.41453
						1.17209
						1.35961
						1.46445
						0.22009
						0.06597
						0.22293

## Sheet: F5B
mTRPA1-V780A											mTRPA1-V780A/ MCD 10 mM
Response Amplitudes (Baseline substracted)											Response Amplitudes (Baseline substracted)
5	10	50	100	300	800		mTRPA1-V780A				5	10	50	100	300	800		mTRPA1-V780A/ MCD 10 mM
0.03008	-0.0038	0.01711	0.4998	0.03471	0.03856		AITC Concentration (µM)	Mean Response Amplitude	SEM		0.00103	0.02558	-0.00337	0.26209	0.00074	0.22791		AITC Concentration (µM)	Mean Response Amplitude	SEM
-0.02541	0.24767	-0.00225	0.08308	0.06616	-0.00951		5	0.0015	0.00242		0.04877	-0.00623	0.00346	1.21279	0.16599	0.84527		5	0.05914	0.01672
0.01519	-0.02847	0.98877	0.66225	0.05771	0.39644		10	0.02399	0.01667		-0.03367	0.70065	0.04826	1.38246	0.62182	0.08072		10	0.11184	0.0197
0.01782	-0.01731	0.16194	0.43329	0.76263	1.09824		30	0.18197	0.02985		0.00628	0.57627	0.24271	0.48274	1.05249	0.00922		30	0.24392	0.04448
0.00019	-0.01604	0.01371	0.10319	0.02061	1.19199		100	0.24657	0.03418		0.31681	0.16079	0.0353	0.98396	0.12789	0.06666		100	0.32838	0.04861
0.00242	0.0084	0.16402	0.87573	0.45435	0.26383		300	0.32678	0.05012		-0.00113	0.02273	0.28233	0.25483	1.00634	0.125		300	0.41841	0.04619
-0.01376	0.03041	-0.0466	0.93168	0.14823	0.00241		800	0.32591	0.04751		-0.00543	0.03406	0.827	0.14028	0.3588	0.53503		800	0.45331	0.05181
0.02022	0.00416	0.06136	0.52495	1.19378	-0.02348						-0.01266	0.03499	0.07531	0.09338	1.24522	-0.01604
0.01351	0.09788	0.08751	-0.00832	0.00102	0.05287						-0.00241	0.02717	0.10227	0.05283	0.27821	1.28092
-0.00115	-0.01286	-0.00302	0.36829	0.84874	0.17644		Fit				0.0012	-0.0175	1.03134	0.28096	0.357	0.05636		Fit
0.004	-0.00476	0.38256	0.12118	0.57674	0.01093		Model	Hill			-0.02683	0.04948	0.12733	0.15513	0.15784	1.25111		Model	Hill
-0.00245	0.00303	0.1335	0.2458	0.37477	0.83696		Equation	y=Vmax*x/(k+x)			0.000366667	0.16524	0.2797	0.54398	0.02505	0.20316		Equation	y=Vmax*x/(k+x)
-0.00101	0.00086	0.11381	0.20476	0.43644	0.00946		Reduced Chi-Sqr	0.00119			0.19134	-0.02426	0.79276	0.67776	0.94867	-0.02023		Reduced Chi-Sqr	0.00024
-0.00601	0.00251	0.37626	0.01345	-0.01552	0.39091		Adj. R-Square	0.9539			-0.00324	0.01742	0.09096	0.73539	0.2975	0.97283		Adj. R-Square	0.99254
-0.00163	0.00645	0.46971	0.69282	-0.01359	0.45449			Value	Fit Error		0.0086	0.00472	0.06159	0.14398	1.24043	1.40715			Value	Fit Error
-0.01507	0.00964	0.26213	1.23001	0.28936	0.29038		Vmax	0.36009	0.03266		0.07669	0.00068	0.01393	0.78293	0.00224	0.4889		Vmax	0.46107	0.01308
0.05272	0.03657	0.00209	0.15724	0.13057	0.81121		k	44.81	16.08		-0.01076	-0.00551	0.56471	0.32454	2.1313	1.37263		k	31.13	3.69
-0.00787	-0.00751	0.00462	0.44843	0.45966	0.78286						0.01069	-0.01331	0.13307	0.46123	0.01455	0.72174
0.00742	0.06912	0.01976	0.0002	0.38784	-0.00912						0.04327	0.00482	0.01306	0.18654	0.17998	-0.01487
-0.00427	-0.00272	0.00231	0.02884	0.6747	0.13933						-0.01576	0.09397	0.04829	1.19672	0.57882	0.75148
-0.0028	0.01825	0.08599	0.33605	0.38365	0.93012						-0.00788	-0.01669	0.3916	1.49705	0.43626	0.67714
-0.00412	0.05252	-0.00438	0.08046	0.11903	0.66288						0.7095	0.000673333	0.01515	0.0282	-0.00157	0.16942
0.01339	0.00347	0.09346	0.24389	0.17276	0.64883						-0.00111	0.00342	0.00912	1.20575	1.15798	0.14641
-0.00138	-0.00479	0.54935	0.96532	0.32505	1.52293						-0.0321	0.0334	0.37639	0.03815	0.61217	0.31479
-0.00274	-0.00949	0.07928	-0.00868	0.17737	0.44243						-0.01168	0.18004	-0.0023	0.35288	0.17427	1.22911
-0.000786667	-0.01594	1.1981	0.27596	1.69844	0.77517						0.01961	-0.00748	0.39434	0.0064	0.66687	1.4909
-0.00961	-0.00453	0.29055	0.08639	0.76134	0.5493						-0.003	-0.00656	1.54129	0.01641	0.49059	1.31938
0.00217	0.0077	0.0073	0.24435	1.61025	0.44191						-0.02626	0.06064	0.1585	0.04228	0.63287	0.87074
0.08833	0.0777	0.07394	0.55501	0.8736	1.62902						0.18988	-0.01765	0.03114	0.02614	0.94507	0.95316
-0.01229	0.069	0.04788	0.28253	0.19362	0.04714						-0.00392	0.09471	0.0444	0.0221	1.03207	1.33245
0.00625	0.0072	0.14872	0.01459	0.65733	0.21397						0.05177	0.35996	0.01379	0.10539	0.62076	0.0544
-0.02087	0.01689	0.20734	0.33359	0.14767	0.43901						0.03228	-0.00961	0.12091	0.22684	0.03201	0.15005
0.00435	0.01334	0.01196	-0.01307	1.46914	0.02398						0.01385	0.00646	-0.03438	0.25858	0.29845	0.2103
0.00127	0.03683	0.00348	0.25407	1.40991	0.01716						0.00363	0.04834	-0.00159	0.33556	1.60745	0.19785
-0.0018	1.11462	0.00535	0.51475	0.027	0.36824						0.00117	-0.03077	0.02038	0.13229	0.05063	0.03529
-0.0117	-0.01096	0.00127	0.03377	0.01953	0.51616						0.01115	-0.01013	0.10414	0.1236	0.23594	0.08698
0.01728	-0.01562	0.52186	0.32739	0.17124	0.23788						0.00809	-0.03562	0.14852	0.00482	0.10447	-0.01676
-0.00607	-0.01189	-0.02843	0.2337	0.49165	0.03852						0.07579	-0.00668	0.66067	0.58578	0.30578	0.16995
-0.00705	-0.04041	0.10382	0.57224	0.15946	0.01821						0.01595	0.12415	-0.00381	0.26055	0.08802	0.17288
0.00552	-0.01921	0.1189	0.30455	0.14612	0.01425						0.09082	0.04524	0.11571	0.4563	-0.01959	0.26764
-0.00453	-0.00819	0.0537	0.66124	0.29068	-0.00985						0.03533	0.10156	0.0268	-0.00476	-0.02243	0.26962
0.01791	0.13218	-0.00963	0.22704	1.5372	0.22284						-0.04433	0.42911	0.32384	0.10315	0.32422	0.22786
0.00139	-0.00151	0.20548	-0.00333	0.3921	-0.01055						0.04877	0.90338	0.89836	0.77463	0.01954	0.68694
0.05233	-0.02441	0.08975	0.02493	-0.00149	0.31768						-0.0078	0.10136	0.52421	0.54249	0.10772	0.14681
-0.00757	-0.00859	0.87019	0.1913	0.17857	0.12594						0.06613	-0.02064	0.31179	0.01193	0.155	0.03271
0.00794	0.0115	0.11455	0.02075	0.12556	0.00101						0.00851	-0.00904	0.04327	0.71068	0.35273	0.4898
-0.0125	-0.00208	-0.06508	0.48457	-0.05165	0.31853						0.05007	-0.0074	1.65098	0.14624	0.32257	0.17693
-0.00138	0.01578	-0.00152	0.20962	0.0206	0.01072						0.00191	0.37025	0.20042	0.04051	-0.01489	1.07179
-0.03107	0.0459	0.31506	0.01174	0.61857	0.6591						0.00252	0.00805	0.22251	-0.000413333	-0.01476	0.80493
0.00139	0.00153	0.42319	0.02029	0.02694	0.16538						0.42841	-0.00545	0.06256	-0.00119	0.18364	0.03286
0.01038	0.04014	0.03827	0.39201	0.00173	1.03548						-0.00338	0.10683	-0.00831	0.03039	0.42683	0.55651
0.0303	0.02537	0.47206	0.04514	0.09195	7.33333e-05						0.01914	0.0258	0.000993333	0.37246	0.35835	1.02555
-0.01016	-0.00322	0.30295	0.02803	0.1902	0.51858						0.00144	0.10581	-0.01487	0.08739	0.27715	1.14
0.00733	-0.01239	0.02954	-0.00343	0.0641	0.02967						0.00428	0.01889	0.37973	0.17639	0.36985	0.04905
-0.00581	-0.01071	0.05723	-0.00658	0.11238	-0.02368						0.000593333	-0.00428	0.00723	0.42388	0.03683	0.02048
-0.00468	0.03018	0.04383	0.5538	0.42244	0.23831						0.22542	0.17875	0.08405	-0.00786	0.35052	1.38516
-0.00684	-0.02535	0.33973	-0.01198	-0.03613	-0.00672						-0.00029	0.08297	0.31535	0.00373	0.11133	0.07244
0.00191	-0.02166	-0.06872	0.17421	-0.02664	0.19124						0.12664	0.03363	0.41405	-0.000526667	0.35648	0.1559
0.0142	-0.00474	0.29378	0.00904	-0.02278	-0.01604						0.00576	0.267	0.23124	0.14084	0.22979	0.06885
-0.01595	-0.00388	0.80877	0.4452	-0.01783	1.01458						0.1199	0.03438	0.01731	0.04237	0.10416	0.00579
-0.00064	-0.01994	0.05303	-0.02039	0.79941	-0.02886						0.11865	-0.00104	0.0537	0.35949	0.77743	0.22263
-0.01809	-0.0285	0.14705	0.01642	0.30484	-0.01108						0.00312	0.41584	0.50384		0.60921	0.0378							--
-0.06474	-0.08328	0.65418	-0.01182	0.00479	0.18769						0.6506	0.17772			0.29233	0.04459							--		--
-0.0025	-0.02503	0.01358	-0.01269	0.08303	0.00572						0.4342	0.00437			0.13189	0.0742							--		--
0.00467	-0.00998	-0.07338	0.01505	-0.08577	0.19531						-0.0004	-0.01759			0.77115	0.42799									--
-0.00214	-0.00941	-0.00887	-0.01226	-0.04751	0.7879						0.14583	0.63064			1.3197	0.01403
-0.00299	-0.07053	0.27811	0.41804	0.10289	0.00605						-0.02774	0.06496			1.00644	-0.00257
	-0.00623	0.93576	0.76905	0.04673	0.01154						-0.00508	0.000993333			0.03324	0.56946
	0.00777	0.63154	1.39818	0.01546	0.10867						-0.00792	0.33203			0.04086	0.02535
	0.04081	0.21803	0.03435	0.00936							0.03888	-0.01731	--		0.23822	0.11323
	--	0.07324	0.02384	0.06473							0.02921	-0.04337	--		0.98536	0.09373
	--	-0.01177	0.03078	0.86989								-0.00198	--		0.65216	0.19956													--
	--	0.01212	0.03898	0.05603								-0.01982			-0.02091	0.077													--
		0.45945	0.27382	0.13808								-0.01315			0.74161	0.87503
		0.02325	-0.02323									0.18845			0.06881	0.01329
		-0.01859	-0.02115									0.48204			0.69432	0.98892
		-0.05057	0.01562									0.44211			0.13012	0.30922
		-0.03624	0.02704									0.02197			0.00294	1.46556
		0.00676	0.02583									-0.00158			0.23487	0.54788
		0.21247	0.01305									0.06097			0.10719	0.13892
												0.04586			0.92663	0.10007	--
												0.00044			0.08188	1.40349	--
												-0.00331			0.14471	0.60513	--
												-0.01672			0.55971	1.52441
												0.09376			0.73866	0.19683
												0.00292				0.32157			--		--
												0.00691							--		--
												1.00631
												-0.00632
												0.04702
												0.04688
												0.00818
												0.38715
												-0.02521
												0.00135
												0.20412
												0.16986
												0.06372
												0.03785
												0.16735
												-0.000123333
												-0.00564
												-1e-05
												0.11796
												0.03422
												0.59635
												0.40228
												0.0083
												0.06292
												-0.01106
												0.04958
												0.02428
												1.05265
												0.14107
												0.05596
																											--
																											--
																													--
																													--
																													--
																													--
																													--
																													--
																													--
																													--
																													--
																													--
																													--
																													--
																													--
																													--
																													--
																													--
																													--
																													--
																													--
																													--
																													--
																													--
																													--
																													--
																													--
																													--
																													--
																													--
																													--
																													--
																													--
																													--
																													--
																													--
																													--
																													--
																													--
																													--
																													--
																													--
																													--
																													--
																													--
																													--
																													--
																													--
																													--
																													--
																													--
																													--
																													--
																													--
																													--
																													--
																													--
																													--

## Sheet: F5C
mTRPA1-F786A												mTRPA1-F786A/ MCD 10 mM
Response Amplitudes (Baseline substracted)												Response Amplitudes (Baseline substracted)
0.5	5	10	30	100	300	800		mTRPA1-F786A				0.5	5	10	30	100	800			mTRPA1-F786A/ MCD 10 mM
-0.00605	0.01429	0.29807	0.12919	0.127	0.22985	1.03878		AITC Concentration (µM)	Mean Response Amplitude	SEM		-0.0088	0.00635	-0.00224	1.13501	0.0522	0.19536			AITC Concentration (µM)	Mean Response Amplitude	SEM
0.0047	0.0046	1.01075	0.25198	0.39981	1.40941	0.02807		0.5	-0.01006	0.00308		-0.02057	0.11142	0.005	0.64877	1.24288	0.01935			0.5	-0.00677	0.00256
-0.00211	0.00068	0.1407	0.61288	0.45431	0.44649	0.25784		5	0.04678	0.01071		0.10222	0.00229	0.03447	1.19524	0.56487	0.14958			5	0.04628	0.01061
0.09462	0.00086	0.12487	0.0917	0.03531	0.40627	0.28836		10	0.17763	0.02474		-0.0097	0.17311	-0.00597	0.02206	0.97234	0.60753			10	0.12921	0.02863
-0.00099	-0.00701	0.48043	0.89303	0.39088	0.35655	0.08023		30	0.41005	0.02706		-0.02953	0.02213	0.01069	0.02901	0.00335	0.47019			30	0.32267	0.03656
-0.00184	0.03788	0.24767	0.87437	0.02828	1.02181	1.15596		100	0.4925	0.04022		-0.01301	0.28002	-0.04079	0.54354	0.06814	0.81042			100	0.47347	0.04122
-0.03055	0.00544	1.01554	0.20718	0.46764	0.43121	0.25996		300	0.59076	0.03796		0.0072	0.00626	-0.00151	0.02258	0.00833	0.27719			800	0.69757	0.05449
-0.05508	-0.00914	0.00574	0.56577	0.18668	0.57198	2.49754		800	0.69745	0.05484		-0.05828	0.26966	0.00113	0.10191	0.21025	0.23755
-0.01643	0.00557	-0.14072	0.17559	0.3273	0.81381	1.54207						-0.01633	0.26477	0.01863	0.45383	0.2628	-0.000333333
0.03172	-0.00608	0.43918	0.03365	0.12045	0.39214	0.0274						-0.00168	0.04116	0.00836	0.67153	0.21831	0.27618			Fit
0.01134	0.0079	0.88999	0.78154	0.05168	0.2212	0.78777		Fit				-0.01657	0.00365	0.00469	0.07845	0.19608	0.72042			Model	Hill
0.00541	0.01103	0.2995	-0.01165	0.08874	0.84116	0.6695		Model	Hill			-0.01448	0.00332	0.23487	0.27922	0.31728	0.04423			Equation	y=Vmax*x/(k+x)
-0.01832	0.11948	0.02845	0.13854	0.05837	0.27084	0.46311		Equation	y=Vmax*x/(k+x)			-0.00212	0.1323	0.02253	0.06112	0.02677	1.45546			Reduced Chi-Sqr	0.0007
0.00902	0.29439	0.00524	0.01227	0.24601	0.1975	0.01137		Reduced Chi-Sqr	0.00223			-0.00723	0.03738	-0.00864	0.33304	0.20616	0.51742			Adj. R-Square	0.9925
0.00612	0.01001	0.41746	0.02822	0.486	0.000696667	0.13412		Adj. R-Square	0.97543			-0.005	-0.01605	0.01916	0.13912	0.23083	0.47047				Value	Fit Error
-0.02217	-0.00158	0.61805	0.2894	0.30097	-0.01172	0.58123			Value	Fit Error		0.00199	-0.00175	-0.00118	-0.01992	0.02394	0.39118			Vmax	0.72827	0.0299
-0.01459	-0.00857	0.79773	0.66418	1.05335	0.26983	0.6235		Vmax	0.68274	0.03882		-0.03765	-0.00744	0.00855	1.67488	0.39401	0.0275			k	45.58	6.35
-0.00898	0.04196	0.00453	-0.01717	0.39732	-0.01554	0.23911		k	28.6	6.86		0.00328	0.00981	-0.00272	0.55834	0.01021	1.0402
-0.00149	0.00417	0.03467	0.03001	0.09018	-0.00959	0.27534						-0.00729	0.43518	-0.02355	0.04235	0.55908	0.28774
-0.0121	0.03297	0.0325	0.56935	0.60624	0.76485	0.23229						-0.00591	0.02052	0.03625	0.02567	0.25925	0.80315
0.01787	0.00601	0.01362	0.31644	0.19319	0.36455	0.72067						-0.01072	0.00109	0.1069	1.8579	0.21315	0.86686
-0.00433	-0.00128	0.64316	0.50307	0.14671	1.24412	0.09173						-0.01241	0.00659	0.02591	0.20919	0.04567	0.69303
0.00189	0.10942	0.84323	1.04566	1.27264	0.84638	0.35003						-0.00965	0.11166	0.06327	0.27314	0.09042	0.38351
0.0124	-0.00606	0.30419	0.03652	0.30415	1.41873	1.67374						-0.00952	0.03386	-0.01912	0.01847	0.284	1.13698
-0.09367	-0.00495	0.14434	0.70415	0.82535	-0.02281	2.45441						-0.01362	0.0295	0.02964	0.01109	0.31127	0.27617
-0.00881	0.01389	-0.03098	0.08323	0.42714	0.34898	2.2706						-0.05387	0.41339	0.09055	0.13115	0.21716	1.40909
-0.12562	0.00761	0.13842	0.22588	0.00864	1.03523	0.23211						-0.00234	0.0177	-0.03804	0.39172	0.02665	0.55076
-0.07853	-0.00141	0.07444	0.42555	0.24307	0.79295	0.80842						0.02223	0.041	-0.04746	0.00416	0.67484	0.92364
-0.03853	0.03661	0.51838	0.01045	0.76941	0.08123	0.45341						-0.00365	0.13687	-0.0128	0.1113	0.34267	0.06091
0.00248	0.11346	0.24255	0.04189	0.3046	0.83625	-0.0278						0.00417	-0.01588	0.15337	0.11623	0.30335	0.10598
0.000506667	0.08741	-0.00556	0.00166	0.23236	0.60246	0.22157						-0.00494	-0.0042	-0.01102	0.01084	0.1751	0.35187
-0.01286	0.00296	0.11291	0.52229	0.31603	0.10705	0.38857						0.002	-0.02279	0.02177	0.1512	0.53665	0.13999
0.01907	5.33333e-05	0.45076	0.17077	0.0306	0.55754	0.62157						-0.00601	0.06062	0.58517	0.05861	0.19674	0.11016
0.00634	0.00451	0.05437	0.84015	0.11392	1.61783	2.09893						-0.00773	0.05065	0.00563	0.06152	0.27088	0.05104
-0.00557	-0.0271	1.11506	0.54831	0.43002	0.11575	0.06219						0.03735	-0.02025	0.29823	0.09032	0.32121	0.13654
0.03498	-0.0054	0.01109	0.572	0.3971	0.20545	0.31858						0.000983333	0.05033	0.26621	0.45619	0.86609	0.75856
-0.01156	0.02981	-0.01772	0.61476	0.27794	0.0231	1.67111						0.000423333	0.02498	0.01753	0.03943	0.17653	0.49301
-0.00387	0.02139	0.31248	0.72548	0.1234	0.32801	0.02383						-0.00115	0.37097	0.00284	0.78576	0.30414	1.22403
-0.07335	-0.01537	0.03916	0.17769	0.99857	0.25622	0.15689						-0.008	0.02947	0.000390323	0.01834	0.33631	0.000253333
0.00338	-0.02829	-0.00437	0.13184	0.31126	0.10295	0.15523						0.00656	0.08202	0.05662	0.00514	0.6251	0.27537
-0.01102	0.10402	0.03839	0.76964	0.41458	0.1747	0.40511						0.00261	-0.02739	0.00117	0.000593333	0.46135	1.52829
-0.0098	-0.00496	0.06598	1.08034	0.04435	0.11161	-0.00864						0.02	0.13678	0.5906	0.0127	0.54179	0.29878
-0.01422	-0.00249	-0.00127	0.93735	0.3161	0.66114	0.07324						0.00023	0.00207	0.01443	1.32365	1.13996	1.12179
-0.03382	0.04116	0.02659	0.07355	0.71853	0.33633	0.15485						-0.01571	-0.01614	0.01977	0.01753	0.19915	0.61267
-0.01354	-0.00517	0.63626	0.68615	0.07039	-0.00581	1.53952						-0.01056	0.02276	-0.00379	0.25513	0.04467	1.47167
-0.02362	0.02899	-0.0015	0.97016	0.05824	1.58107	0.20478						-0.00283	0.05949	0.02126	0.92262	0.13653	0.57765
0.02063	0.00181	0.18503	0.15498	0.15286	0.37692	0.05119						-0.01178	-0.01347	0.26362	0.7133	0.03756	0.40624
-0.03179	0.2327	0.07728	0.18767	0.24007	0.03337	1.72503						-0.02477	-0.00514	-0.00165	0.00344	0.32854	0.30628
-0.00314	-0.0046	0.05067	0.28949	0.09262	0.00527	0.0263						-0.00931	0.00063	-0.00134	0.05248	0.0586	0.32949
-0.00947	0.18989	0.05153	1.32714	0.11422	0.32136	1.04685						-0.00859	-0.00123	0.71868	0.1284	-0.01209	0.1489
0.00227	0.21105	0.18918	0.81367	0.20848	-0.03132	0.84585						-0.01386	0.1133	0.00293	0.04349	0.46061	0.39628
-0.0001	0.02498	0.30002	0.50632	0.05549	1.20352	0.79015						0.06015	0.19485	0.69575	0.09276	0.01231	0.27575
-0.01058	-0.0147	0.00738	0.64146	0.2105	0.75788	-0.00873						-0.06515	0.00737	0.12313	0.09203	-0.00246	0.55168
-0.00441	0.12346	0.0686	0.06079	0.07357	1.98112	0.16094						-0.01156	0.01761	-0.0149	0.05248	0.1544	0.22572
-0.00526	0.35581	0.22191	0.9323	0.06058	0.77021	0.25479						-0.00504	-0.01179	-0.01708	0.61226	0.20756	0.49532
0.000986667	0.00161	0.01133	0.21937	0.10303	1.12749	-0.02943						-0.00479	0.07425	-0.11085	0.07236	0.96903	1.15579
0.00441	-0.01034	0.10733	0.73251	0.25885	9.33333e-05	-0.02263						-0.00217	0.000236667	-0.00749	0.16844	0.18662	1.37972
-0.00523	-0.00774	0.036	1.05491	0.50929	0.23817	0.42452						-0.0018	-0.01563	0.13533	0.44054	0.31801	0.41678
-0.01086	0.162	0.02642	0.18094	0.00764	0.34948	0.94141						0.000476667	0.01329	0.04391	0.2003	0.15176	0.73731
-0.01206	0.02717	0.19499	0.05147	0.51055	0.38411	0.13615						-0.0223	0.01341	0.05568	0.38426	0.57597	0.39868
-0.0043	0.01553	0.87461	0.07366	1.46466	0.02	0.36245						-0.00158	-0.00158	0.03208	0.49657	0.87195	0.52239
-0.02012	-0.00215	0.69037	0.61132	0.43804	0.79914	0.38667						-0.0123	0.00467	0.1121	0.52725	0.18685	0.2484
-0.02718	0.03392	0.01328	0.64216	0.11587	0.55833	0.21736						-0.00185	0.08239	0.90796	0.27069	0.06861	0.23438
-0.01933	-0.00153	0.20046	0.74291	0.46896	0.95038	0.37761						-0.00878	0.01223	0.8669	0.08962	1.00069	0.1534
-0.01088	0.00136	0.04039	-0.0496	1.3539	0.42445	1.04497						0.01657	0.04008	0.13637	0.12756	0.79587	0.94858
0.06615	0.17025	0.74919	0.01058	-0.01939	0.22055	0.31083						-0.02025	0.00802	0.60125	0.4961	0.64783	0.20608
-0.01392	0.13887	0.16477	0.73378	0.20919	0.13828	0.05499						-0.03926	0.0023	0.04157	0.01602	0.17785	0.88752
-0.02599	-0.00403	0.14844	0.4036	0.47215	0.47278	0.34911						-0.00168	0.01425	0.08506	0.2079	1.14097	0.00171
-0.00738	0.04048	0.20615	0.45613	0.69785	0.80563	0.19325						-0.00703	0.0067	0.93944	-0.00225	0.23591	-0.00339
-0.04011	0.0604	0.88004	0.07838	0.14848	1.19345	0.94516						-0.01904	-0.02741	0.000603226	0.53551	1.1152	0.27363
-0.0063	0.23113	0.31757	0.68264	0.56714	1.03215	0.03471						-0.00648	0.0352	0.00103	0.10499	0.59622	0.02589
-0.00373	0.06906	0.29196	1.09145	0.40895	0.42097	0.27126						-0.01944	0.01141	0.16713	1.54019	0.97311	0.26185
-0.03676	-0.02188	0.000296667	0.36102	0.13128	0.70271	0.11887						-0.0122	0.03095	0.73533	0.00043	0.14993	0.33558
0.01969	0.01625	0.07684	0.45945	0.08422	0.20464	2.01838						0.00942	-0.06397	0.11189	0.13042	-0.02215	0.7698
-0.02488	0.000329032	-0.01285	0.5757	0.34635	0.29947	0.94177						-0.04746	0.01962	0.40574	0.04435	0.62867	0.79723
-0.02752	-0.00241	-0.00839	0.70043	0.00429	0.62168	0.56318							0.00267	2.04328	0.04332	0.0307	1.63924
-0.03799	0.00293	0.01899	0.12961	0.04814	1.0709	0.09261							-0.08303	-0.01447	0.03417	0.4235	0.06034
-0.01345	0.06402	-0.04813	0.71226	0.74203	0.97879	0.36722							-0.00345	-0.01391	0.48524	0.52888	1.14352
0.01046	0.36375	0.06448	0.02151	0.64339	0.18689	1.91883							0.04099	-0.01699	0.2	0.66369	0.73992
-0.02279	-0.00172	-0.01838	0.59824	0.84065	0.07652	0.55603							-0.01941	0.01463	1.05324	1.09675	-0.01204
0.00463	0.04927	0.21456	0.6253	0.75867	0.00238	1.57021							-0.01835	-0.00173	-0.0087	0.07912	0.1093
0.000806667	0.00267	0.04433	0.71882	0.80564	0.28814	0.06089							-0.00242	0.87912	0.21124	0.10098	0.47295
-0.01868	-0.05265	0.03904	0.49805	0.41246	-0.00045	0.5599							-0.00789	0.0429	0.00128	1.06803	0.39462
0.00031	-0.00972	0.02906	0.25702	0.98434	0.10713	0.04845								0.24517	0.51163	0.65171	1.59568
-0.04006	-0.00885	0.02282	0.56086	0.12646	0.08552	1.77042								0.14888	0.4835	0.44858	2.02186
	-0.000522581	0.37173	0.13646	0.66809	0.81576	0.12425								0.58116	0.2005	0.44599	0.20563
	0.00212	-0.0148	0.90028	0.01372	0.64463	0.26708								0.93762	0.33198	0.17245	1.0853
	0.00313	0.79257	0.0935	0.47094	0.2547	0.63897								0.0294	0.46947	0.10106	1.64407
	-0.000341935	0.65152	1.08643	0.63295	0.041	1.90675								0.0255	0.21455	0.26927	2.28003
	0.000951613	0.02776	0.56003	0.79107	0.78397	0.46343								0.13125	0.08977	0.3425	0.23479
	0.00784	0.04824	0.25888	0.48095	0.41183	0.99307								-0.00492	0.26144	0.6312	0.31079
	0.01002	-0.1559	0.07404	0.57314	1.36182	1.65373								-0.03241	1.05761	0.94202	0.52618
	0.01301	0.04148	0.3147	0.05955	1.78137	0.68108								0.13218	0.25449	0.55479	1.38808
	0.00621	0.09386	0.16451	0.7272	1.62611	0.70657								-0.03724	0.15175	1.92152	0.88771
	-0.00131	0.03339	1.11099	0.07103	1.19859	0.44117								0.00119	0.03432	1.47277	0.01398
	0.01275	-0.02214	0.6522	0.03231	1.5944	1.16368								0.01938	0.45009	-0.01612	2.78962
	-0.00425	0.75643	1.11445	0.50788	0.39547	0.11161								0.02093	-0.01823	0.04504	2.67554
	-0.0161	0.01635	0.17385	1.30837	0.16067	0.05709								-0.01898	0.04817	0.04515	1.67121
	0.00865	0.00443	0.8642	1.70648	0.28233	0.14126								-0.0037	-0.07483	0.97814	1.47881
	-0.0429	-0.01763	0.65737	1.14057	0.23237	0.67509								-0.0173	0.35892	0.07521	0.33222
	-0.0531	-0.04271	0.75102	0.15151	0.76721	0.25164								-0.01011	0.18184	0.51158	0.12853
	0.14064	-0.01252	0.17502	1.56667	0.01412	1.23789								-0.00429	0.7698	1.4192	1.71767
	-0.000693548	-0.062	0.38279	0.92588	1.25111	0.32094								-0.07796	0.38937	0.94582	0.85726
	0.26895	-0.00477	0.97757	0.144	1.16782	0.47027								-0.03266	1.21736	0.20977	1.55338
	0.03948	-0.00793	0.00312	0.02663	0.60971	0.15372								1.6668	0.21208	0.43124	0.00948
	0.07522	-0.01738	0.19698	0.02805	0.2486	0.0171								0.02891	-0.02305	1.6327	0.98858
	-0.00212	-0.06862	0.4855	0.04018	1.51253	0.61202								0.06386	0.04733	0.3711	1.62006
	0.00442	-0.000743333	0.80071	0.78752	1.78381	1.22399								-0.00577	0.30461	-0.02539	1.64665
	-0.06423	0.04818	0.16835	0.10609	1.02709	0.10624								-0.02844	0.49424	0.000496667	0.21596
	-0.01318	0.00335	-0.00356	0.10144	0.77523	0.92714								-0.00359	0.51796	1.5151	0.77715
	-0.00944	0.01367	0.04189	0.19818	0.69255	0.91842								-0.00204	0.09194	0.03229	0.39228
	-0.01297	-0.00529	0.14077	0.33799	0.37038	0.49614								0.06055	0.03906	1.36754	1.33575
	-0.01392	0.54767	0.01391	0.69229	0.27451	0.92578								-0.01484	0.22968	-0.02087	2.20869
	0.000354839	-0.00707	0.53185	1.82418	0.65552	1.84447								-0.0032	0.01383	2.2255	1.54472
	0.00351	-0.01026	0.20154	0.65213	0.32445	0.86701								-0.01767	0.07666	0.19841	2.50358
	-0.0347	-0.02248	0.84829	0.92985	0.43494	1.99865								-0.01398	-0.0211	0.12327	1.83009
	-0.00596	-0.02101	1.04429	0.67323	0.23794	1.61909								-0.01214	-0.02356	0.30924	0.27981
	0.69219	0.01691	0.14126	1.50213	0.7225	2.00206								0.000176667	-0.01495	0.43797	0.01373
	0.78338	-0.000143333	0.20216	0.4788	0.88802	1.95512								-0.00897	0.17381	0.16443	2.4715
	0.00303	-0.0199	0.06781	1.50984	0.28613	0.48839							--	-0.03065	0.36401	1.17021	2.10611
	-0.00764	0.05804	0.11536	0.54169	1.25163	0.9088								-0.01988	0.04645	1.79292	1.59219
	-0.00535	0.30533	0.43248	0.13947	0.83343	1.12912								-0.03985	0.10132	0.72035	2.70591
	0.41445	0.13852	0.3906	0.63628	0.77592	1.86781								-0.0073	1.63251	0.9864	0.48549
	0.00302	0.00887	0.01069	0.54408	0.88781	1.2369								0.00473	0.56342	0.56885	0.17658
	0.0034	0.01656	0.05038	0.13237	1.26232	0.45903								-0.01817	1.4913	1.50839	0.12154
	0.00332	0.05456	0.37016	0.39758	0.2396	0.20011									1.74831	0.94675	0.14355
	0.0069	0.02117	0.02628	0.15562	0.2192	1.59083									0.12858	0.90292	0.21265			--
	0.28858		0.23776	0.08938	0.18286	1.13563									0.06999	0.80765	1.23278			--
	0.01525		0.4595	0.28655	0.7646	1.6484									0.65282	0.06817	0.18679			--
			0.26816	0.00496	0.05488	1.4575									0.65517		0.1816			--
			0.06333	0.87943	1.5798	1.65445											0.13174
			0.14192	1.0906	0.1441	0.69267											0.04577
			0.19599	0.70537	0.98928	0.15333											1.22933
			0.31061	0.06899	0.4956	1.54178											1.60187
			0.33304	0.46625	0.7127	0.08667											1.37525
			0.26221	0.61993	1.3369	1.01959											1.92531
			0.20949	0.17774	0.23665	0.96516											0.23682
			1.29024	0.03929	0.42716	1.4678													0.24199
			-0.00038	1.58321	1.87597	0.08478													0.53923
			0.79673	0.13234	0.87236	0.09536													1.5288
			1.08054	0.30089	0.39641														0.56291
			0.09248	0.09536	1.4999														0.46379
			0.04141	2.47181	1.57333														0.13253
			0.66983	0.49268	0.09006														1.09037
			0.01223	0.18879	0.11397														0.10214
			1.09837	0.64094	0.30646														0.66589
			0.81826	0.95454	1.97605														0.06855
			0.20898	0.16299	1.95091														0.13097
			0.10634	3.0356	1.0075														0.03306
			0.76157	0.82488	0.27685														0.07115
			0.22479	1.82944	1.80733														0.08722
			0.16582	1.5055	0.16178														0.22758
			0.57563	0.53028	0.32072														0.06056
			0.12749	1.1165	0.30699
			0.83091	1.39169	0.62865
			0.01447	0.10961	0.27123
			0.03336	1.00198	0.15158
			0.20022		0.0177
			0.08004		0.21605
			0.46211		1.70991
			0.33191		0.00517
			0.16462		0.09027
			0.05574		0.11039
					0.31595
					0.35422
					0.34534
					0.98503
					0.02459
					1.24551
					0.79349
					0.08065
					0.04532
					0.23332
					0.12652
					1.14641
					0.76655
					0.56639
					0.48134
					1.26158
					0.1837
					0.32482
					0.28395
					1.53353
					0.33327
												--
												--
												--
												--
												--
												--
												--
												--

## Sheet: F5D
mTRPA1-L850A														mTRPA1-L850A/ MCD 10 mM
Response Amplitudes (Baseline substracted)														Response Amplitudes (Baseline substracted)
0.5	1	5	10	50	100	300	800		mTRPA1-L850A					1	5	10	30	50	100	300		mTRPA1-L850A/ MCD 10 mM
-0.01795	0.03434	0.00547	0.00374	0.000823333	0.00197	-0.04958	0.11345		AITC Concentration (µM)	Mean Response Amplitude	SEM			-0.02125	0.01117	0.16606	0.06832	0.21937	0.00605	0.03259		AITC Concentration (µM)	Mean Response Amplitude	SEM
-0.00425	-0.00575	0.01208	-0.00454	0.000113333	0.04312	0.09919	1.50562		0.5	0	0			-0.05192	-0.00594	0.02698	0.0569	0.06214	0.04622	0.03636		1	0	0
0.00356	0.00041	0.00505	0.00471	-0.01572	-0.00192	0.03569	0.20476		1	0	0			0.00253	-0.00395	-0.01322	0.00449	0.03645	-0.00692	1.09028		5	0.0365	0.00746
-0.00502	-0.01067	-0.00799	-0.01079	-0.01592	0.00653	0.67543	0.52757		5	0.02381	0.00914			-0.000813333	0.18857	-0.01589	0.13632	0.11024	-0.000196667	1.01279		10	0.03573	0.00816
-0.00105	-0.01461	-0.00446	-0.00433	0.26181	-0.00334	0.3336	0.00836		10	0.0219	0.00419			0.00059	0.0854	0.02363	0.13932	0.02364	0.02442	0.01003		30	0.07076	0.0121
0.01134	-0.03411	0.00521	-0.00593	0.01278	0.10953	0.09413	1.70809		50	0.08868	0.01881			-0.0112	-0.02562	0.00783	0.02043	-0.00582	0.05686	0.02035		50	0.0952	0.0194
0.00521	-0.02296	0.01575	-0.000933333	0.02276	0.04652	0.01904	0.05171		100	0.09772	0.01972			-0.2527	-0.00386	0.02541	0.04302	0.000233333	-0.00923	0.23681		100	0.10987	0.02047
-0.01365	-0.00703	-0.00599	0.0041	-0.00756	0.05225	0.15808	-0.00549		300	0.17971	0.02947			-0.04942	-0.0888	0.00396	0.04378	-0.000193333	-0.000753333	0.01574		300	0.15574	0.0228
-0.05724	0.02036	0.01569	0.00557	0.00348	0.15806	0.07767	0.59932		800	0.2015	0.03769			-0.01534	0.09912	0.21519	0.05843	0.18328	0.11644	0.03312
-0.01071	-0.0011	-0.01987	-0.00496	0.00865	0.00737	1.01331	0.76316							0.01056	0.03915	-0.00494	0.15328	0.01159	0.00363	0.12595
-0.0275	0.01743	0.00216	-0.00832	0.37233	0.00648	0.00171	0.09244							-0.10128	0.04736	0.00778	0.02416	0.00643	0.04621	0.13795
-0.00513	-0.00619	0.0318	0.00893	0.01178	0.02011	-0.000343333	-0.01202		Fit					0.02475	0.3112	-0.01676	0.05975	0.24039	0.0065	0.03565		Fit
-0.00219	0.00908	0.00218	-0.0111	0.09944	-0.00451	0.02257	1.11109		Model	Hill				-0.00514	-0.01699	-0.00581	0.12314	0.07886	0.000903333	0.45115		Model	Hill
0.02267	0.02713	0.02101	-0.00521	0.00761	0.01211	-0.01624	0.04703		Equation	y=Vmax*x/(k+x)				-0.01666	0.06931	-0.03403	0.04088	-0.00191	6.66667e-06	0.01534		Equation	y=Vmax*x/(k+x)
-0.06774	-0.02209	-0.0258	0.00582	-0.00106	-0.0111	0.0871	0.32301		Reduced Chi-Sqr	0.00016				-0.04744	0.01902	-0.0089	0.19901	0.01426	0.06235	0.1171		Reduced Chi-Sqr	0.00028
-0.02936	-0.00528	0.02675	-0.00138	0.00825	-0.0052	-0.01229	1.45773		Adj. R-Square	0.98038				-0.02542	0.00389	0.17441	0.09459	0.05629	-0.00692	0.113		Adj. R-Square	0.90438
-0.01156	-0.00346	0.02313	-0.0052	0.04866	0.00539	0.24969	0.07404			Value	Fit Error			-0.01163	0.02382	-0.01821	0.37145	0.16207	0.02504	0.17027			Value	Fit Error
-0.02496	-0.06987	-0.00618	0.00654	0.19325	-0.00292	0.00716	1.02175		Vmax	0.22806	0.01633			-0.02936	0.07342	0.03035	0.02411	0.11423	0.2569	0.0598		Vmax	0.22806	0
-0.00449	-0.04005	0.02614	-0.00651	0.02982	-0.00802	0.01237	0.0494		k	97.97	22.74			0.0062	-0.01689	0.23987	-0.00722	0.41949	0.1033	0.06042		k	85.42	14.29
0.00341	0.00457	0.00562	0.0014	-0.00636	0.00431	-0.01416	0.03211							-0.02008	0.00349	0.24721	-0.00868	0.00192	0.01556	0.09715
-0.00456	-0.00523	0.01619	0.00455	0.90571	0.06069	1.75285	-0.00377							-0.06112	-0.02366	0.05578	0.01235	0.037	0.0262	0.11609
-0.00927	-0.01074	-0.01294	-0.00156	0.0452	-0.000276667	-0.00209	0.08881							-0.01272	0.01171	-0.02074	0.05798	0.37546	0.32429	0.56295
0.00484	-0.02041	0.08128	-0.00589	-0.046	0.02051	1.43592	0.01192							-0.01524	-0.03148	0.20447	0.00441	-0.03397	0.01857	0.018
-0.00809	0.0133	0.35367	0.08775	0.0787	-0.00226	0.02652	0.3525							-0.0038	-0.000273333	-0.01959	0.03426	0.00974	0.02173	0.06426
-0.04959	-0.02268	0.06391	0.00584	0.02455	0.28885	0.22935	0.06049							-0.00666	0.05951	0.06229	0.02196	0.06375	0.0532	0.17226
0.00316	-0.01067	0.21302	-0.00483	0.0064	0.01659	0.02596	-0.03435							0.03801	0.15914	-0.02835	0.08235	-0.01687	0.0462	0.04468
-0.03909	-0.00918	0.05897	0.13783	0.01009	0.00255	0.83357	-0.02227							0.02084	0.00838	0.01278	0.03517	-0.0565	-0.01304	0.06784
-0.00249	-0.00644	0.13185	0.00364	-0.000396667	0.13355	-0.01848	0.00381							-0.03268	0.00701	0.02022	0.02432	0.10402	0.00368	0.00174
0.0059	-0.00513	0.19723	0.00129	-0.00271	-0.00747	0.09757	0.07082							0.06496	0.01427	-0.01921	0.11342	-0.00383	0.01896	-0.00387
-0.03075	0.02002	0.08398	0.01299	0.02764	0.01522	0.57134	0.12055							0.00411	0.0427	-0.06086	0.04873	-0.000336667	0.04016	0.01704
0.01668	-0.00679	0.06972	0.02111	0.00474	0.01412	0.12198	0.02538							0.00409	-0.00754	-0.00347	0.40259	-0.0192	0.20686	0.08646
0.03075	-0.0381	0.06754	-0.02137	-0.00424	0.00121	0.81462	0.13924							-0.00154	-0.00218	0.02254	0.1279	-0.01251	0.18291	0.08924
-0.05481	-0.01062	0.06182	-0.00697	-0.00545	0.00675	0.48122	1.06924							-0.02825	-0.02562	0.00587	0.00433	0.11475	0.14545	0.12413
-0.00345	-0.01451	0.41353	0.01136	-0.01385	0.0034	0.27655	0.00293							-0.00106	0.08033	-0.02323	0.0806	0.22094	0.18004	0.25663
-0.01415	-0.00949	0.06746	-0.000536667	0.03232	-0.00409	0.04414	0.20708							0.00621	0.10625	-0.01241	0.000966667	0.15608	0.08184	0.14233
0.01573	-0.00259	0.07706	0.04956	0.02143	0.0059	-0.02334	1.55399							0.46414	-0.0121	0.15265	-0.00506	0.34245	0.05844	0.02499
-0.01293	-0.00538	-0.01682	-0.01633	0.43555	0.0185	0.08326	0.06773							-0.02328	0.11278	0.02063	0.01167	0.05927	0.34913	0.34402
-0.04271	-0.0069	0.00302	-0.01369	0.02617	0.01945	0.08199	0.07498							-0.06896	0.15688	0.17556	0.01077	0.03958	0.01921	0.18243
-0.04509	-0.00545	-0.00541	0.00367	0.02406	0.000803333	0.43145	0.04392							-0.00486	0.000963333	0.01045	-0.01134	0.06684	-0.000576667	0.82034
-0.11795	-0.00628	-0.01689	0.00385	0.00566	0.02122	0.1704	0.23083							-0.00614	0.02862	0.23245	0.24036	0.25073	0.00425	0.13745
6.93889e-17	-0.0168	-0.02743	-0.01153	0.00192	0.00195	0.93832	1.65557							-0.01073	0.01378	-0.01631	0.00777	-0.01906	0.08097	0.04378
0.00107	-0.01068	0.06304	0.03409	0.01189	-0.00555	0.05958	0.23249							0.02777	0.0048	0.09199	0.0346	0.00113	0.01888	0.48864
0.00614	-0.03893	-0.05944	-2e-05	0.08432	0.0033	0.7315	1.13428							-0.00787	0.01799	0.12496	0.01747	0.64524	0.05595	-0.00103
0.01322	-0.01858	-0.00595	-0.0151	-0.04728	-0.0224	0.11954	0.01514							-0.01378	0.02726	-0.01418	0.01417	0.02449	-0.000643333	0.05331
0.02151	-0.01919	-0.01695	0.00393	-0.01179	-0.00278	0.03207	0.07564							-0.01032	-0.00111	-0.00948	0.06638	-0.01462	1.41051	0.35264
0.04386	-0.00682	-0.01374	0.0002	0.32709	0.04421	0.87867	0.0543							-0.01599	6.33333e-05	-0.00115	0.01952	0.10523	0.37238	-0.000103333
-0.02242	-0.06056	-0.02338	-0.00977	0.12384	0.00469	0.19399	0.02646								0.00739	0.00309	0.06579	0.71277	-0.01182	0.04722
-0.13322	0.00112	-0.0299	-0.00284	0.32892	0.01406	0.16019	-0.00505								0.02319	0.01881	0.01314	1.0369	0.13752	0.01652
0.13042	0.0006	-0.01231	0.00371	0.14927	0.00607	0.01522	0.14341								0.10717	0.0306	0.00747	0.36216	0.03934	0.10301
-0.02588	-0.01851	-0.00407	0.03138	0.01793	-0.01468	0.3448	0.01666								0.07022	0.02792	0.01169	0.06963	0.05097	-0.00064
	-0.00236	-0.00275	0.19131	-0.01046	0.03634	0.02123	0.09924								0.10121	0.04008	0.22702	-0.00689	0.15418	-0.000103333
	-0.00158	-0.0095	-0.0193	-0.00212	0.00377	0.00573	0.02839								0.02198	0.11895	0.02211	0.00968	0.05425	0.05918
	0.00212	-0.01049	0.00363	-0.00743	0.53846	0.87918	0.00739								0.15325	-0.01604	0.01803	0.02475	0.07507	0.03937
	0.01342	-0.00587	0.00245	0.03693	0.06062	0.00388	0.01193								0.00196	0.000773333	0.03298	0.08041	0.01439	0.04894
	-0.00276	-0.11063	-0.0097	-0.00607	0.37022	0.18334	0.04006								-0.02203	0.03031	-0.00107	0.38687	-0.00617	0.25277
	-0.00482	-0.07348	-0.01725	-0.02214	0.23829	0.12795	0.01257								0.13276	0.00935	0.05601	0.11386	-0.000826667	0.49002
	-0.007	-0.02302	-0.00864	0.000946667	0.20257	0.45286	0.02778								0.0914	-0.01349	0.06459	-0.01157	0.00155	0.06532
	0.0153	0.10409	0.00468	-0.00403	0.05102	0.10791	0.06875								0.03505	-0.00665	0.03744	0.26561	0.00655	0.012
	-0.00606	-0.01894	0.01174	0.02523	0.1565	0.71161	-0.00563								0.01117	0.03403	0.02032	0.01101	0.01965	0.04941
	-0.00397	-0.00772	-0.00869	-0.00505	1.34346	0.000143333	0.01583								-0.00198	-0.00825	0.06176	-0.000926667	0.07811	0.0641
	-0.0012	0.00708	-0.00891	-0.04048	0.18613	0.07267	0.282								0.02664	0.12667	0.02757	-0.01578	0.04806	0.01592
	-0.02094	-0.00716	-0.00782	-0.03031	0.05859	0.20324	0.02877								0.0079	-0.00193	0.04425	0.000103333	0.11202	0.59523
	-0.01234	0.00112	-0.01275	0.00347	0.21996	0.04424	0.2247								-0.02104	0.07858	0.03638	0.37423	0.09269	0.24081
	-0.01683	-0.0039	-0.00417	0.06576	0.67043	0.00222	0.02332								-0.00813	0.00664	-0.00763	0.13011	0.01732	0.34301
	-0.00829	-0.04666	0.00484	1.5418	1.49068	0.01335	0.23711								0.08232	0.01446	0.02259	-0.01434	0.06219	0.23777
	-0.01121	0.08203	-5.33333e-05	0.07422	0.00509	0.00119	-0.0117								0.00638	-0.01354	0.000216667	0.01931	0.01142	0.06581
	0.01064	0.00117	0.01407	0.20923	0.1599	0.15201	0.04516								0.00839	-0.03075	-0.00104	-0.00975	-0.00918	0.06908
	-0.01643	0.01475	-0.00388	0.0798	0.16318	0.14329	0.01685								0.13509	-0.00525	-0.00613	-0.00164	0.29765	0.23574
		-0.0013	0.01767	0.18249	0.00262	0.0017	0.05861								-0.00574	0.03309	0.0282	-0.02911	0.0228	0.03302
		0.04852	0.03355	0.0507	-0.00107	0.00092	0.01208								-0.00883	-0.03738	0.00608	0.00997	0.07518	0.8538
		0.01633	0.00211	0.07244	0.03191	0.03367	0.45486								0.01122	-0.00415	0.00246	-0.00875	0.01762	0.03201
		-0.01449	-0.02642	0.15752	0.02066	0.08372	0.13696								0.09969	0.00178	0.01234	-0.01169	0.06152	0.23246
		0.02184	-0.01171	0.55215	0.03136	-0.00975	0.01393									0.00852	0.15026	0.02912	0.01623	0.50198
		-0.01688	-0.01031	0.04339	0.01799	0.0236	0.08276									-0.02595	0.28683	0.00138	0.34865	0.03789
		-0.06456	0.04506	0.05138	-0.00356	0.24398	0.12198									0.09285	0.1304	-0.02082	0.03752	0.00178
			0.00359	1.26774	0.0024	0.01702	0.18775									-0.00909	0.13228	-0.0081	0.04673	0.07205
			-0.01174	0.16081	0.06577	-0.000683333	0.00899									-0.01255	0.88571	-0.01185	0.10271	0.12092
			-0.0088	0.32653	0.26288	0.00506	0.00022									0.06853	-0.00332	-0.00253	-0.00233	0.09181
			-0.02539	0.05658	-0.00289	0.04115	0.01409									0.03312	0.26739	-0.01405	0.99867	0.05787
			-0.02351	-0.00029	0.04761	1.07999	0.03597									0.0135	0.02953	-0.00599	0.28117	0.05854
			-0.0125	-0.01125	0.00417	-0.00397	0.03126									0.00412	0.17307	-0.00999	0.1446	0.06297
			-0.00321	-0.00359	-0.00111	0.01108	0.01525									0.14885	0.05152	-0.00381	0.10283	0.22626
			0.015	0.01575	0.92343	0.05285	0.31426									0.00544	0.00674	0.07282	0.0653	0.00524
			0.01181	0.08026	-0.00331	0.0363	0.01521									-0.00734	0.3966	0.23181	-0.00245	0.00373
			-0.01459	-0.000473333	-0.00399	0.07601	0.02273									-0.00552	0.03605	0.16393	-0.00895	0.08668
			0.0084	-0.00489	-0.00772	0.02134	0.03296									0.30627	0.03428		0.079	0.003
			-0.00552	-0.00762	0.07755	0.00746	0.02499										-0.01129		-0.01265	0.32805
			-0.00672	-0.01159	0.08658	0.13564	0.01819										-0.0029		0.13041	0.00375
			-0.000773333	0.04982	-0.0059	-0.00452	-0.00457										-0.00319		0.00144	0.9753
			-0.000553333	0.00051	0.27439	-0.00115	0.08102										0.0724		0.25621	0.42582
			0.129	0.0664	0.92753	0.00108	0.10199										0.19253		0.01146	0.01765
			-0.01378	0.0555	-0.01056	-0.00379	0.01127										0.00966		0.05219	0.01609
			-0.01783	0.00318	-0.0013	0.16857	0.03331										0.00783		-0.00156	-0.02396
			0.0092	-0.00934	0.27025	0.00024	0.01733										0.03756		-0.0043	0.02134
			0.02838	-0.0011	0.12795	0.22659	0.03916										0.08286		0.0125	0.01126
			-0.01903	0.00883	-0.00334	-0.00135	0.03333										-0.000536667		0.04071	0.13457
			-0.00221	-0.00896	0.00216	0.01227	0.19445										0.02474		0.01409	0.04218
			0.00411	0.09219	-0.02048	0.00463	0.05728										0.04185		0.07487	0.00668
			0.00131	0.00223	-0.00152	0.04382	0.07024												0.09156	-0.00301
			-0.01068	1.03039	0.08017	0.02177	0.00046												0.57067	0.16075
			-0.03876	0.06687	-0.00205	0.00174	0.00741												0.07415	0.00247
			-0.02669	0.000853333	1.00121	0.01383	0.05151												0.24065
			-0.00559	0.00612	0.03896	0.07641	0.19672												0.62791
			-0.01672	-0.00896	0.00677	0.00813	0.08393												0.00449
			-0.00575	0.38833	1.25091	0.03062	0.34088												-0.02405
			0.03888	-0.01232	-0.05339	0.00828				--									0.28462
			-0.00415	0.0029	0.00631	0.01082				--									1.00166
			-0.00569	-0.03731	-0.00422	0.00639				--									0.33558
			-0.00408	0.23358	-0.00417	0.19499				--
			0.11091	-0.00547	0.15691	0.36261				--
			0.00519	-0.0072	0.15497	0.06411				--
			0.00783	-0.0055	0.134	0.1593				--
			0.00471	0.00627	-0.02017	0.03103				--
			-0.00505	-0.00474	-0.00222	0.36454				--
			0.02801	-0.00167	-0.01159					--
			0.01683	0.00087	0.08554
			0.01535	-0.000446667	0.0663			--
			0.00776	0.01938	0.00113			--
			-0.00796	-0.00703	0.03151			--
			-0.00653	-0.00622	-0.03213			--
			-0.0281	-0.01522	0.04199			--
			0.12979	0.04259	0.06086			--
			0.17027	-0.00839	0.07293			--
			0.15406	-0.01868	0.00095			--
			0.05859	0.10828	1.03906			--
			0.04534	0.11248	-0.01902			--
			0.13019	0.00726	0.24979			--
			0.29657	0.0101	-0.02018
			0.1774	0.06352	-0.00588
			0.34086	0.02177	0.0114
			0.16115	-0.00985	0.0414
			0.21688	-0.00253	-0.00603
			0.11782	-0.00718	-0.00804
			0.13349	-0.01365	-0.02271
			0.05487	0.34092	0.18117
			0.05766	0.00781	-0.0011
			-0.02641	0.09406	-0.00733
			-0.01121	-0.02959	0.05815
			-0.01405	0.06019	0.00581
			-0.00968	0.00195	0.00306
			-0.00532	0.49222	0.06787
			-0.00223	0.20393	0.04811
			-0.02771	0.02749	0.07561
			-0.0106	0.06177	0.01639
			0.13308	2.32484	-0.00554
			0.00159	0.00571	-0.01719
			0.05713	0.03181	0.21521
			0.00196	-0.01742	0.02569
			-0.01239	-0.0159	-0.0079
			-0.00647	0.09962	0.02732
			0.0854	-0.00307	0.00426
			-0.0045	-0.01879	-0.00147
			-0.01965	0.09876	-0.00552
			0.00585	-0.00609	0.15926
			-0.01744	0.00128	-0.000723333
			0.00623	-0.008	-0.00863
			-0.02063	0.63058	0.00369
			0.08225	-0.01166	-0.00171
			-0.02131	0.02949	0.23483
			0.01539	-0.03252
			0.03299	6.66667e-06
			0.01498	0.02543
			-0.00068	-0.046
			0.06845	0.02704
			-0.02614	-0.01327
			-0.00396	0.14288
			0.0021	0.21178
			-0.00133	0.1031
			0.01055	0.03287
			0.03113	-0.00126
			-0.00759	-0.00611
			-0.00772	-0.00867
			0.18427	-0.00927
			0.000613333	-0.00484
			0.00586	0.8402
			0.01237	-0.00989
			0.1495	0.00385
			0.2017	0.02953
			0.00867	-0.00875
			0.10359	-0.00384
			-0.01142	-0.01232
			0.00052	-0.0096
			0.00202	0.09389
			0.08115	-0.01692
			-0.00608	0.15196
			0.01412	0.12317
			0.0041	-0.00847
			-0.01335	0.11601
			0.06924	0.01042
			0.11096	0.00212
			0.00624	-0.02324
			0.01086	0.3003
			0.1318	0.02122
			0.0245
			0.06866
--
--		--
--		--		--
--		--		--
--		--		--
--		--		--
--		--		--
--		--		--
--		--		--
--		--		--
--		--		--
--		--		--
--		--		--
--		--		--
--		--		--
--		--		--
--		--		--
--		--		--
--		--		--
--		--		--
--		--		--
--		--		--
--		--		--
--		--		--
--		--		--
--		--		--
--		--		--
--		--		--
--		--		--
--		--		--
--		--		--
--		--		--
--		--		--
--		--		--
--		--		--
--		--		--
--		--		--
--		--		--
--		--		--
--		--		--
--		--		--
--		--		--
--		--		--
--		--		--
--		--		--
--		--		--
--		--		--
--		--		--
		--		--
		--		--
		--		--
		--		--
		--		--
		--		--
		--		--
		--		--
		--		--
		--		--
		--		--
		--		--
		--		--
		--		--
		--		--
		--		--
		--		--
		--		--
		--		--
		--		--
		--		--
		--		--
		--		--
		--		--
		--		--
		--		--
		--		--
		--		--
		--		--
		--		--
		--		--
		--		--
		--		--
		--		--
		--		--
		--		--
		--		--
		--
		--
		--
		--
		--
		--
		--
		--
		--
		--
		--
		--
		--
		--
		--
		--
		--
		--
		--
		--
		--
		--
		--
		--
		--
		--
		--
		--
		--
		--
		--
		--
		--
		--
		--
		--
		--
		--
		--
		--
		--
		--
		--
		--
		--
		--
		--
		--
		--
		--

## Sheet: F5E
mTRPA1-Y852A														mTRPA1-Y852A/ MCD 10 mM
Response Amplitudes (Baseline substracted)														Response Amplitudes (Baseline substracted)
0.1	0.5	1	5	10	30	100	300	800		mTRPA1-Y852A				1	5	10	30	100	300	800		mTRPA1-Y852A / MCD 10 mM
-0.01284	-0.00712	-0.00505	0.0035	0.0931	0.5634	0.01226	0.00706	1.40454		AITC Concentration (µM)	Mean Response Amplitude	SEM		-0.07647	0.00526	0.0016	0.34917	0.10366	0.09494	0.07321		AITC Concentration (µM)	Mean Response Amplitude	SEM
0.01433	-0.01781	0.01343	-0.00439	0.09612	1.26238	0.00523	0.03808	1.01811		0.1	0.00107	0.00461		-0.01086	-0.01547	1.01203	0.36223	0.15939	0.25778	0.72888		1	0.01853	0.01304
0.01567	-0.02584	0.01036	0.00348	-0.00224	0.0031	0.12351	0.05994	0.11299		0.5	-0.003	0.00195		0.07076	-0.00085	0.0446	0.52827	0.03721	0.81667	0.04613		5	0.03606	0.01007
0.00728	-0.02443	0.000403333	0.000563333	-0.00124	0.03951	0.24847	0.0311	-0.00308		1	-0.0073	0.00344		-0.02316	0.00757	0.49044	0.80381	0.14368	0.08353	0.03961		10	0.08999	0.01913
-0.00309	-0.01327	-0.00688	0.01958	-0.01076	0.41786	0.08115	0.03568	0.65541		5	0.00512	0.00221		-0.03098	0.0302	0.04026	0.73488	0.0844	0.62286	0.00962		30	0.19487	0.02264
0.00816	-0.0528	0.00703	-0.00153	0.000153333	-0.00541	0.02709	1.4406	0.53122		10	0.0793	0.02229		0.00104	0.045	-0.00849	0.12413	0.035	0.13987	0.00652		100	0.23213	0.02745
0.00131	0.00056	-0.07485	-0.000683333	-0.00194	-0.02116	0.26569	0.18962	0.07742		30	0.2757	0.04344		-0.02321	0.01993	0.11341	-0.12541	0.24367	0.12493	0.00496		300	0.31202	0.03211
-0.02298	-0.0453	-0.00485	0.01794	0.06641	1.26573	0.38859	0.90273	0.03778		100	0.3199	0.0342		0.03179	0.01366	0.21063	0.7038	0.0127	0.33009	0.30016		800	0.31143	0.03582
-0.01171	0.00271	-0.02336	0.00198	-0.00287	1.74761	0.03113	0.82255	0.04449		300	0.35674	0.05497		0.06206	-0.00544	0.68129	0.05923	0.02572	0.22363	0.01969
-0.00558	-0.00425	-0.00701	0.0137	0.03175	0.80504	-0.03359	0.66696	-0.02572		800	0.41042	0.05412		-0.0099	-0.0198	0.06355	0.89449	0.01918	0.06887	0.06532
0.03273	0.00267	-2e-05	0.01937	0.06399	0.70562	1.19543	0.02621	0.08449						-0.00256	0.00109	0.21949	0.383	0.01282	0.15885	0.00482
0.0044	-0.00551	0.00169	-0.00308	0.00876	0.01014	0.12824	0.01348	0.79388						0.03975	0.02697	0.00147	0.64121	0.04626	0.06399	0.6027
-0.00291	-0.04661	-0.0069	-0.01171	0.17636	-0.01635	0.06526	1.12454	0.10986		Fit				0.03292	-0.00585	-0.055	0.11561	0.48161	0.07228	0.85777		Fit
0.09019	-0.00707	-0.00161	0.02427	0.01132	0.72552	0.21837	1.38806	0.25268		Model	Hill			0.03775	-0.01598	0.01127	0.72154	0.09894	0.0716	0.23464		Model	Hill
-0.00374	-0.01645	-0.0226	0.06615	0.00397	0.21056	0.00388	0.14573	0.04821		Equation	y=Vmax*x/(k+x)			-0.02652	0.00245	1.08658	0.0689	0.76272	0.32968	0.23664		Equation	y=Vmax*x/(k+x)
-0.00846	-0.03126	-0.06204	-0.00316	0.56877	0.47271	0.2138	0.06554	0.43864		Reduced Chi-Sqr	0.00032			-0.01809	-0.02475	0.000416667	0.03274	0.31435	0.01038	0.89082		Reduced Chi-Sqr	0.00032
0.00482	-0.03824	-0.00996	0.03147	-0.00776	0.86794	0.04127	0.02781	0.39075		Adj. R-Square	0.98281			-0.01469	0.10451	0.55795	0.27623	0.28856	0.06825	1.5603		Adj. R-Square	0.98281
0.00809	0.0011	-0.00821	0.01841	0.28463	0.22355	1.645	0.47118	0.07345			Value	Fit Error		0.03534	0.23452	0.01615	0.42444	0.60512	0.01151	1.19337			Value	Fit Error
-0.00679	-0.01745	-0.0127	-0.00167	0.04745	0.70458	0.25135	0.00644	0.52045		Vmax	0.32344	0.0142		-0.02282	-0.00117	-0.00599	0.49702	0.01052	0.02042	1.16567		Vmax	0.32344	0.0142
-0.03255	-0.00783	0.00048	-0.00506	-0.01951	0.52471	0.26768	1.5168	0.58999		k	25.78	4.82		-0.00337	0.01538	0.16685	0.51209	0.36034	0.02759	0.05568		k	25.77	4.82
-0.02998	-0.0033	-0.00127	0.00317	-0.000503333	0.4332	0.5124	0.00144	1.32532						-0.01487	0.05035	0.2329	0.13465	0.02909	0.12442	0.6096
0.01103	-0.02881	-0.08014	-0.00454	0.00351	0.21061	0.44258	0.06318	1.37276						-0.01757	0.00075	0.61432	1.52636	0.44407	0.01134	0.01804
-0.01641	-0.00426	-0.06413	-0.00581	0.05272	1.09652	0.42641	0.18915	0.00535						0.0062	-0.000813333	0.77338	0.40997	0.47274	0.09178	0.18354
-0.00939	0.000843333	-0.0104	7.33333e-05	0.06401	0.85203	1.08509	0.41322	0.59073						-0.02179	-0.0154	0.18404	0.04708	0.38822	0.43363	0.17603
0.0004	-2e-05	-0.00456	-0.000253333	1.65578	0.48784	0.04654	0.13846	0.61326						-0.00283	0.02206	-0.03922	0.06049	0.09397	0.28476	0.44064
-0.02007	0.00185	0.03152	0.000373333	0.00485	0.63595	0.27177	0.01195	0.04565						-0.06218	0.00837	0.00596	0.86437	0.37986	0.42411	0.52888
-0.01873	-0.00996	0.00067	-0.00291	1.17663	0.01386	0.33339	0.05434	0.61598						-0.00731	0.03496	-0.02988	0.23174	0.54598	0.02907	2.23694
0.00514	0.01696	0.02933	-0.05527	-0.05151	0.17496	1.48993	0.14752	0.00887						0.03775	0.10587	0.0418	-0.0045	0.16199	0.02341	1.03654
-0.01353	-0.00537	0.00393	-0.01388	0.06175	0.82927	0.31964	0.01315	0.07085						0.05857	0.1843	-0.03618	0.1671	0.05724	0.1225	0.87179
0.03796	-0.02681	-0.00171	0.00142	0.0664	-0.06356	0.01596	0.10298	0.00527						0.01312	0.16106	0.08764	0.39381	1.0247	0.02148	0.09423
0.01196	-0.00866	-0.00654	-0.01334	0.17977	-0.06037	0.000786667	0.1976	0.07395						0.07525	0.02923	0.37829	0.03509	0.93852	0.02052	0.13863
0.03284	-0.01715	-0.01072	-0.00306	-0.02578	0.08902	1.11706	0.06155	-0.01062						-0.00702	-0.01752	0.06601	0.14335	0.07272	0.01316	1.18575
-0.01496	-0.01389	-0.01601	-0.01224	0.00592	0.04302	0.15416	1.8308	0.22581						-0.00365	0.04313	0.01877	0.14651	0.29856	0.16745	0.38489
-0.00271	0.00544	-0.00287	-0.00164	-0.01857	1.29777	0.01703	1.35842	0.04837						0.02151	0.07545	-0.01591	0.05137	0.76633	0.18687	0.11189
0.01806	-0.00403	0.00734	-0.000396667	-0.032	0.1015	0.15413	0.03824	-0.02773						0.00332	0.07125	0.01427	0.18944	0.37896	0.08115	0.74378
-0.09623	0.00603	-0.00497	0.000286667	-0.00503	0.09262	0.29574	0.12076	0.23108						-0.00239	-0.000786667	0.08323	0.25264	0.81942	0.7578	0.41541
-0.00427	0.00565	0.01174	0.00203	1.48767	0.03954	0.0063	0.02524	0.10947						0.58652	-0.01898	0.55539	0.09271	0.03929	0.79987	0.35967
-0.00729	0.00836	-0.1077	0.00532	0.02521	0.00763	0.07122	0.05089	-0.0279						-0.03905	0.03058	-0.02364	0.04694	0.32122	0.07933	0.03949
0.00925	0.00307	-0.00212	0.01839	0.03087	0.02188	0.06196	0.71978	0.10723						-0.00578	0.00718	0.0133	0.42973	0.0272	0.17841	0.03527
-0.00342	0.000766667	-0.00863	0.00184	0.00756	0.19751	0.12255	0.18491	1.00558						0.16167	0.06623	0.0063	-0.00495	1.02341	0.03649	0.1959
-0.04344	0.00766	-0.00988	0.00384	0.06647	0.02606	0.15916	0.07224	0.31811						0.00635	0.06893	-0.03478	0.00847	0.01105	0.02405	0.06539
0.04964	-0.02119	-0.000996667	0.10719	0.14866	0.41675	0.66083	0.03425	0.46329						-0.10638	-0.00519	-0.05285	-0.02384	0.45961	0.28741	0.08679
0.11848	-0.01075	-0.00026	0.01248	0.00853	0.30959	0.75975	0.6181	1.08651						0.06881	0.01748	0.02379	0.31267	0.17306	0.17538	0.01877
0.04207	-0.00299	-0.00148	0.0053	-0.04228	0.19066	0.44686	0.34664	0.02492						0.01744	-0.00291	-0.03088	0.92684	0.20909	0.04427	0.17701
0.01504	-0.01253	-0.00248	0.02883	0.04994	0.00179	0.00636	0.26811	0.14695						0.08668	-0.00355	-0.04423	0.01988	-0.01014	0.12523	0.1285
-5.66667e-05	-0.00304	0.01702	0.07981	0.00879	0.20687	0.15981	0.46212	0.84456						-0.0073	0.04563	-0.01622	0.05062	0.09158	0.52676	-0.03444
0.00141	0.01611	-0.00923	-0.00296	0.000506667	0.08122	0.03063	0.18163	0.04821						-0.02913	0.04399	-0.01176	0.18028	0.14721	1.10988	0.02944
-0.0134	-0.05505	0.0028	-0.01413	-0.01874	0.03521	0.65699	0.05183	-0.02102						-0.01712	-0.00657	-0.11764	-0.00618	0.00844	0.00353	0.18351
-0.0649	0.00711	0.0016	0.14719	0.04589	0.19431	0.63319	0.00823	0.17413						0.11446	0.35475	0.00313	0.22622	0.18892	0.06604	0.01905
-0.0175	-9e-05	0.00375	-0.00279	0.06406	0.02488	0.2636	0.09565	0.14499						-0.01134		0.05374	-0.07727	0.05119	0.23017	0.01691
	0.00404	-0.08344	0.12885	0.02769	0.01931	0.26494	0.84357	0.7971						-0.00574		0.19506	0.36264	0.1037	0.25483	0.04061
	0.00578	-0.00905	0.00128	-0.01607	1.31466	0.85298	0.06991	0.62986								0.21208	-0.00957	-0.01068	1.34463	0.01461
	-0.01111	0.01297	0.00803	0.00807	0.22493	0.77069	0.16852	0.17283								0.09236	0.30944	0.01566	0.0108	0.01623
	-0.01067	0.04811	0.02544	0.02581	0.17528	0.11901	0.95696	0.32904								-0.03038	0.08003	1.06743	0.03355	0.00988
	0.01677	0.01046	0.05197	-0.01469	-0.009	0.03943	0.13758	0.04189								-0.02457	0.06331	0.15584	0.21718	0.01074
	-0.00302	0.00221	-0.00138	0.02778	0.54356	0.08242	0.40303	0.20531								0.0169	-0.00239	0.24991	0.00286	0.09184
	-0.00509	-0.01909	0.00422	0.15181	0.02944	0.11056	0.07661	0.04379								-0.05667	0.21744	0.42103	0.54376	0.13613
	-0.00311	0.01441	0.00429	0.25621	0.27965	0.41782	0.02936	0.32575								-0.0241	0.09176	0.1978	0.92234	0.32983
	-0.00557	0.00428	0.00183	-0.00271	2.48333		0.000653333	1.21226								0.12022	0.00303	0.24613	0.96839	-0.00233
	0.00389	0.00395	0.01289	0.01577	0.18046		0.02432	0.07747								-0.03854	0.43981	0.15797	0.96376	0.04412
	0.0189	-0.02983	0.01525	-0.00366	0.02124		0.02094	1.24546								-0.00703	-0.00256	-0.000613333	1.0248	0.0866
	-0.00845	-0.00623	0.0063	-0.01378	0.00177		0.16458	1.74429								-0.02226	-0.00586	0.14555	1.25952	0.05035
	-0.000356667	0.04051	0.01748	0.16158	0.35613		0.08869	0.02341								-0.02154	0.32836	-0.01582	0.12449	0.076
	0.00223	-0.01311	0.00666	0.03713	0.13308		0.7588	0.32686								0.23559	0.34904	-0.01647	0.08955	0.21623
	-0.00271	-0.00189	0.0075	-0.01299	0.13789		1.34871	0.38598								0.17887	0.02947	-0.01175	0.36119	0.00557
	0.00129		0.02951	0.00029	0.00376		1.29733	0.42834								0.10952	0.75127	-0.00174	0.26569	0.44759
	0.00527		0.00595	0.0018	0.000886667		1.24974	0.12336								-0.01999	0.0801	-0.01386	0.11154	0.12159
	0.00403		-0.000453333	0.14768	-0.00037		0.02451	0.04883								0.39428	0.83214	0.24287	0.02993	0.44386
	-0.00362		-0.00475	0.15584	0.00928		0.90997	0.01913								0.1251	0.48653	-0.01442	1.12081	0.38445
	-0.01797		0.00293	0.59599	0.01065		0.18661	0.00349								0.28293	0.16647	0.04501	0.18957	0.01433
	0.02294		0.00132	0.09106	0.02091		0.20639	0.13605								0.23734	0.000733333	-0.00965	0.29473	-0.00831
	0.01936		-0.00207	0.02888	0.49912		0.125	0.567								0.00235	0.18599	0.09675	0.03885	0.49335
	-0.00412		0.00624	0.16929	0.0286		0.10753	0.10107								-0.0105	0.24143	0.7808	1.18363	0.52182
	0.00542		0.01922	-0.01047	0.01528			0.00749								0.06677	-0.0039	0.10064	0.29486	0.29196
	0.01173		-0.00305	0.00155	0.01141			0.19399								-0.00377	0.00201	-0.00388	0.79531	0.28714
	0.00768		0.00307	-0.00404	0.15062			0.90337								-0.00231	0.01209	0.0358	0.45466	0.70227
	0.06262		0.0109	0.00266	0.06193			0.01791								0.02152	0.0132	0.18383	0.52961	1.52354
	0.000873333		0.00962	-0.000376667	0.11973			0.09487								0.00235	-0.00825	-0.00408	0.21486	0.26486
	-0.02492		-0.03438	0.02427	0.03154			0.08941								0.00136	-0.00439	1.23655	0.70718	0.35226
	0.05483		-0.0031	0.02106	0.01375			0.04997								-0.00637	0.01553	0.70155	0.11719	0.01376
	-0.005		0.04618	0.00358	0.00657			0.29542								-0.02304	-0.00684	0.00416	0.34187	0.57341
	0.00242		-0.0045	0.01543	0.02781			1.28856								0.000786667	-0.00813	0.04588	0.45524	0.00807
	0.00178		-0.00639	0.0064	0.12378			0.0293								-0.00395	0.37604	0.4147	0.57409	0.38799
	0.00552		0.000496667	0.00136	0.05726			0.01348								0.02852	0.41117	0.18559	0.23383	0.02234
	0.0048		0.08366	0.04319	0.00272			1.62799								0.00266	0.14886	0.07828	0.30333	0.17027
	0.00867		0.00192	-0.0022	0.00153			1.44535								0.00224	0.0056	0.40438	0.25785	0.65069
	0.03804		-0.03464	0.000456667	0.00181			-0.02701								-0.0735	-0.02505	0.01855	0.13477	1.03473
	0.00482		0.00563	0.00305	0.07365			1.3553								0.00494	0.01161	0.09129	0.07261	1.34051
	0.0217		-0.00644	0.00446	-0.01602			0.1315								0.00191	0.52995	0.27856	0.42203	0.22496
	0.00248		-0.00251	-0.00925	0.12497			1.95739								-0.06009	0.50611	0.00036	1.30098	0.66238
			0.00469	0.05583	0.08114			2.10948								-0.03071	-0.01819	-0.01939	0.12402	0.01861
			-0.01102	-0.00216	0.01659											0.05579	0.16245	0.35282	0.24012	0.54329
			0.00221	-0.00789	0.02346											0.0009	-0.0121	0.09582	0.05617	0.12761
			0.00257	-0.00326	0.00467											0.07525	0.16926	0.71106	0.10026	0.51294
			-0.05288	0.01332	0.02584											0.03436	0.23414	0.01349	0.08564	0.25778
			-0.0146	0.04115	0.68533											0.00242	-0.00127	0.67576	0.49076	0.01566
			-0.00378	0.00427	0.15827											-0.00712	-0.02064	0.05477	0.24429	1.64709
			0.04125	-0.00334	0.25548											0.0243	0.44807	0.13869	0.2627	0.89737
			-0.00544	-0.00105												-0.00805	0.29671	0.27186	0.15397	0.13068
			-0.01037	0.00315												0.00256	0.06353	0.02587	0.18017	0.04428
			-0.00585	0.00287												-0.00541	0.09251	0.04922	0.91452	0.14082
			-0.00357	0.01972												0.15498	-0.00558	-0.00412	0.6211	0.05999
			-0.0028	0.18909												0.00511	-0.000413333	0.00883	0.60866	0.01518
			-0.00369	0.01704												0.03518	0.0392	0.000313333	0.21172	0.044
			-0.01008	0.02379												0.03317	0.0264	0.01011	0.24023	0.46652
			-0.00442	0.000236667												-0.00385	0.32833	0.39301	0.14145	0.63575
			-0.000856667	-0.00149												0.04623	0.01982	0.13754	0.24246	0.03899
			-0.03251	0.00742												-0.00375	-0.00966	0.13679	0.13487	0.11675
			-0.00503	0.0034												0.11892	0.00343	1.05103		0.07257
			-0.000766667	-0.007												0.00895	0.18439	0.05914		0.04522
			-0.01063	0.00736												0.00377	-0.03132	0.54133		0.01878
			-0.00312	0.25668												-0.0278	0.00168			-0.00308
			-0.00993	0.00414												-0.00256	0.00166			0.01439
			-0.00177	0.01266												0.14073	0.00295			0.09018
			-0.00489	0.0867												-0.00526	0.27543			0.03158
			0.00437	0.07447												-0.00306	0.00235			0.00552
			-0.00957	0.14786												-0.03309	0.0156			0.07101
			-0.00149	0.04553												0.04057	0.0402			0.0118
			0.00046													0.00367	0.14482			0.02697
			-0.02218													0.11738	0.12735			0.15366
			0.00164													0.85709	-0.00158			0.14317
			-0.04337														0.03566			0.15615
			-0.000783333														0.31785			0.13721
			0.00109														-0.00126			0.03014
			-0.00601														0.0035			0.30464
			-0.00872														0.00903			0.07048
			-0.000403333														0.19016			0.90184
			-0.00185														-0.00262			0.03496
			0.04261														-0.00246			0.04396
			-0.01699														0.00253			0.02215
			-0.00255														0.32426			0.72658
			-0.00341														0.23406			1.37771
			-0.00618														0.02715			0.79253
			0.01865														0.48238			0.08751
			0.00263
			0.00789
			0.01333
			-0.00056
			0.00369
			0.00274																			--
																						--
																						--
																						--
																						--
																						--
																						--
																						--
																						--
																						--
																						--
																						--
																						--
																						--
																						--
																						--
																						--
																						--
																						--
																						--
																						--
																						--
																						--
																						--
																						--
																						--
																						--
																						--
																						--
																						--
																						--
																						--
																						--
																						--
																						--
																						--
																						--
																						--
																						--
																						--
																						--
																						--
																						--
																						--
																						--
																						--
																						--
																						--
																						--
																						--
																						--
																						--
																						--
																						--
																						--
																						--
																						--
																						--
																						--
																						--
																						--
																						--
																						--
																						--
																						--
																						--
																						--
																						--
																						--
																						--
																						--
																						--
																						--
																						--
																						--
																						--
