# Supplementary material for: Mouse TRPA1 function and membrane localization are modulated by direct interactions with cholesterol
Source: eLife. 2019 Jun 11;8:e46084. doi: 10.7554/eLife.46084 (PMC6590989; doi:10.7554/eLife.46084)
Supplement: Figure 7—source data 1. [file elife-46084-fig7-data1.xlsx]

## Sheet: F7C
	Current upon AITC 300 µM
	Wild type	V780A	F786A	L850A	Y852A
	-180.023	-3.99187	-38.7841	-26.2536	-168.098
	-193.803	-2.78815	-253.153	-1.4442	-0.52916
	-94.1782	-6.06809	-47.1799	-9.13589	-1.30261
	-24.5111	-18.728	-79.6952	-49.9763	-18.2428
	-218.537	-122.812	-17.5822
		-5.7477	-40.8572
		-64.061	-30.2824
		-27.9412
Δ Current (pA/pF)	-142.211	-31.5173	-72.5048	-21.7025	-47.043
SEM	36.1093	14.9194	56.8608	10.7565	40.558

## Sheet: F7D
				Response Amplitudes (Baseline substracted)
AITC 300 µM				AITC 300 µM						AITC 300 µM
	Δ Current (pA/pF)	SEM		WT	V780A	F786A	L850A	Y852A			Δ [Ca2+] (µM)	SEM
WT	142.211	36.1093		0.82298	0.03471	0.22985	-0.04958	0.00706		WT	0.75479	0.06188
V780A	31.5173	14.9194		1.73439	0.06616	1.40941	0.09919	0.03808		V780A	0.32678	0.05012
F786A	122.646	56.8608		0.9321	0.05771	0.44649	0.03569	0.05994		F786A	0.59076	0.03796
L850A	21.7025	10.7565		0.29772	0.76263	0.40627	0.67543	0.0311		L850A	0.17971	0.02947
Y852A	47.043	40.558		1.68703	0.02061	0.35655	0.3336	0.03568		Y852A	0.35674	0.05497
				0.32769	0.45435	1.02181	0.09413	1.4406
				0.58311	0.14823	0.43121	0.01904	0.18962
				0.67748	1.19378	0.57198	0.15808	0.90273
				3.10836	0.00102	0.81381	0.07767	0.82255
				1.48006	0.84874	0.39214	1.01331	0.66696
				3.12277	0.57674	0.2212	0.00171	0.02621
				1.03493	0.37477	0.84116	-0.000343333	0.01348
				1.47717	0.43644	0.27084	0.02257	1.12454
				0.08642	-0.01552	0.1975	-0.01624	1.38806
				1.60316	-0.01359	0.000696667	0.0871	0.14573
				-0.0485	0.28936	-0.01172	-0.01229	0.06554
				1.1228	0.13057	0.26983	0.24969	0.02781
				1.47389	0.45966	-0.01554	0.00716	0.47118
				0.15115	0.38784	-0.00959	0.01237	0.00644
				0.7928	0.6747	0.76485	-0.01416	1.5168
				0.17738	0.38365	0.36455	1.75285	0.00144
				0.81236	0.11903	1.24412	-0.00209	0.06318
				0.2111	0.17276	0.84638	1.43592	0.18915
				0.22141	0.32505	1.41873	0.02652	0.41322
				1.59014	0.17737	-0.02281	0.22935	0.13846
				0.43037	1.69844	0.34898	0.02596	0.01195
				1.56526	0.76134	1.03523	0.83357	0.05434
				1.0967	1.61025	0.79295	-0.01848	0.14752
				0.84121	0.8736	0.08123	0.09757	0.01315
				0.56859	0.19362	0.83625	0.57134	0.10298
				-0.000293333	0.65733	0.60246	0.12198	0.1976
				1.45566	0.14767	0.10705	0.81462	0.06155
				0.03537	1.46914	0.55754	0.48122	1.8308
				1.0436	1.40991	1.61783	0.27655	1.35842
				1.9717	0.027	0.11575	0.04414	0.03824
				1.48859	0.01953	0.20545	-0.02334	0.12076
				0.37953	0.17124	0.0231	0.08326	0.02524
				0.09381	0.49165	0.32801	0.08199	0.05089
				1.08153	0.15946	0.25622	0.43145	0.71978
				0.17697	0.14612	0.10295	0.1704	0.18491
				0.03393	0.29068	0.1747	0.93832	0.07224
				0.03397	1.5372	0.11161	0.05958	0.03425
				0.64363	0.3921	0.66114	0.7315	0.6181
				0.1064	-0.00149	0.33633	0.11954	0.34664
				0.13847	0.17857	-0.00581	0.03207	0.26811
				0.65044	0.12556	1.58107	0.87867	0.46212
				3.06051	-0.05165	0.37692	0.19399	0.18163
				1.86349	0.0206	0.03337	0.16019	0.05183
				1.49608	0.61857	0.00527	0.01522	0.00823
				1.21474	0.02694	0.32136	0.3448	0.09565
				1.60866	0.00173	-0.03132	0.02123	0.84357
				0.56126	0.09195	1.20352	0.00573	0.06991
				1.98505	0.1902	0.75788	0.87918	0.16852
				0.59807	0.0641	1.98112	0.00388	0.95696
				0.70187	0.11238	0.77021	0.18334	0.13758
				0.3468	0.42244	1.12749	0.12795	0.40303
				0.23816	-0.03613	9.33333e-05	0.45286	0.07661
				0.08792	-0.02664	0.23817	0.10791	0.02936
				0.09174	-0.02278	0.34948	0.71161	0.000653333
				0.55039	-0.01783	0.38411	0.000143333	0.02432
				0.66067	0.79941	0.02	0.07267	0.02094
				1.37486	0.30484	0.79914	0.20324	0.16458
				0.21996	0.00479	0.55833	0.04424	0.08869
				0.50787	0.08303	0.95038	0.00222	0.7588
				1.05088	-0.08577	0.42445	0.01335	1.34871
				0.77059	-0.04751	0.22055	0.00119	1.29733
				0.51967	0.10289	0.13828	0.15201	1.24974
				1.61784	0.04673	0.47278	0.14329	0.02451
				0.07336	0.01546	0.80563	0.0017	0.90997
				0.95192	0.00936	1.19345	0.00092	0.18661
				1.07265	0.06473	1.03215	0.03367	0.20639
				0.00552	0.86989	0.42097	0.08372	0.125
				0.71392	0.05603	0.70271	-0.00975	0.10753
				0.89814	0.13808	0.20464	0.0236
				0.03619		0.29947	0.24398
				1.74531		0.62168	0.01702
				1.44449		1.0709	-0.000683333
				0.15822		0.97879	0.00506
				1.22127		0.18689	0.04115
				0.16907		0.07652	1.07999
				-0.00871		0.00238	-0.00397
				0.75225		0.28814	0.01108
				0.00703		-0.00045	0.05285
				0.30344		0.10713	0.0363
				0.4954		0.08552	0.07601
				0.03618		0.81576	0.02134
				0.42821		0.64463	0.00746
				1.25768		0.2547	0.13564
				0.2314		0.041	-0.00452
				0.26116		0.78397	-0.00115
				0.33442		0.41183	0.00108
				1.69663		1.36182	-0.00379
				0.25261		1.78137	0.16857
				0.74344		1.62611	0.00024
				0.27542		1.19859	0.22659
				0.51544		1.5944	-0.00135
				0.76774		0.39547	0.01227
				0.08917		0.16067	0.00463
				1.83709		0.28233	0.04382
				0.64268		0.23237	0.02177
				0.60268		0.76721	0.00174
				0.0459		0.01412	0.01383
				1.20264		1.25111	0.07641
				0.56013		1.16782	0.00813
				0.84004		0.60971	0.03062
				0.90332		0.2486	0.00828
				0.63868		1.51253	0.01082
				0.96317		1.78381	0.00639
				0.0742		1.02709	0.19499
				0.89272		0.77523	0.36261
				0.0957		0.69255	0.06411
				0.0284		0.37038	0.1593
				0.11117		0.27451	0.03103
				0.0634		0.65552	0.36454
				0.51055		0.32445
				0.65015		0.43494
				0.14104		0.23794
				0.89051		0.7225
						0.88802
						0.28613
						1.25163
						0.83343
						0.77592
						0.88781
						1.26232
						0.2396
						0.2192
						0.18286
						0.7646
						0.05488
						1.5798
						0.1441
						0.98928
						0.4956
						0.7127
						1.3369
						0.23665
						0.42716
						1.87597
						0.87236
						0.39641
						1.4999
						1.57333
						0.09006
						0.11397
						0.30646
						1.97605
						1.95091
						1.0075
						0.27685
						1.80733
						0.16178
						0.32072
						0.30699
						0.62865
						0.27123
						0.15158
						0.0177
						0.21605
						1.70991
						0.00517
						0.09027
						0.11039
						0.31595
						0.35422
						0.34534
						0.98503
						0.02459
						1.24551
						0.79349
						0.08065
						0.04532
						0.23332
						0.12652
						1.14641
						0.76655
						0.56639
						0.48134
						1.26158
						0.1837
						0.32482
						0.28395
						1.53353
						0.33327
