# Supplementary material for: Mouse TRPA1 function and membrane localization are modulated by direct interactions with cholesterol
Source: eLife. 2019 Jun 11;8:e46084. doi: 10.7554/eLife.46084 (PMC6590989; doi:10.7554/eLife.46084)
Supplement: Figure 8—source data 1. [file elife-46084-fig8-data1.xlsx]

## Sheet: F8G
Total mCherry intensity												Mean mCherry intensity
WT	MCD	V780A	V780A MCD	F786A	F786 MCD	L850A	L850A MCD	Y852A	Y852A MCD				N total	Mean	SEM		WT			WT
17117.5	14617.6	4448.11	3980.04	5479.44	6519.67	11912.6	4156.66	3884.3	6526.27			WT	7	15820.2	978.079		vs			vs
13637.2	5179.93	19627.7	3476.24	9280.31	10128.7	9356.36	5097.51	10029.6	942.29			WT MCD	5	10907	2400.37		V780A			Y852A
16059.4	5745.19	5969.08	5389.69	5311.21	11827.9	13202	7384.56	5221.13	11413.2			V780A	6	7272.31	2490.96
16572.6	11645.1	3693	8882.71	13559.1	5394.02	9951.5	4656.35	2384.22	11383.4			V780A MCD	5	5061.47	1014.66		Mann Whitney test			Mann Whitney test
19769.1	17347.4	5262.76	3578.69	16227.5	3871.63	10488.4	9843.71	9987.9	12373			F786A	6	9028.94	2008.63		P value	0.035		P value	0.0025
15948		4633.16		4316.02		13638	6753.98					F786A MCD	5	7548.39	1486.45		Exact or approximate P value?	Exact		Exact or approximate P value?	Exact
11637.3												L850A	6	11424.8	721.578		P value summary	*		P value summary	**
												L850A MCD	6	6315.46	869.489		Are medians signif. different? (P < 0.05)	Yes		Are medians signif. different? (P < 0.05)	Yes
												Y852A	5	6301.44	1578.66		One- or two-tailed P value?	Two-tailed		One- or two-tailed P value?	Two-tailed
												Y852A MCD	5	8527.63	2154.2		Sum of ranks in column A,C	64 , 27		Sum of ranks in column A,I	63 , 15
																	Mann-Whitney U	6		Mann-Whitney U	0
																	WT			L850A
																	vs			vs
																	F786A			L850A MCD
																	Mann Whitney test			Mann Whitney test
																	P value	0.0221		P value	0.0043
																	Exact or approximate P value?	Exact		Exact or approximate P value?	Exact
																	P value summary	*		P value summary	**
																	Are medians signif. different? (P < 0.05)	Yes		Are medians signif. different? (P < 0.05)	Yes
																	One- or two-tailed P value?	Two-tailed		One- or two-tailed P value?	Two-tailed
																	Sum of ranks in column A,E	65 , 26		Sum of ranks in column G,H	56 , 22
																	Mann-Whitney U	5		Mann-Whitney U	1
																	WT			WT
																	vs			vs
																	L850A			MCD
																	Mann Whitney test			Mann Whitney test
																	P value	0.014		P value	0.202
																	Exact or approximate P value?	Exact		Exact or approximate P value?	Exact
																	P value summary	*		P value summary	ns
																	Are medians signif. different? (P < 0.05)	Yes		Are medians signif. different? (P < 0.05)	No
																	One- or two-tailed P value?	Two-tailed		One- or two-tailed P value?	Two-tailed
																	Sum of ranks in column A,G	66 , 25		Sum of ranks in column A,B	54 , 24
																	Mann-Whitney U	4		Mann-Whitney U	9

## Sheet: F8H
Membrane mCherry intensity											Membrane mCherry intensity
WT	MCD	F786A	F786A MCD	L850A	L850A MCD	V780A	V780AMCD	Y852A	Y852AMCD			N total	Mean	SEM
0.54715	0.16997	0.34155	0.08995	0.14976	0.05639	0.37425	0.02491	0.19846	0.04733		WT	7	0.39263	0.07516		WT			WT
0.37471	0.02926	0.01143	0.09836	0.24179	0.07995	0.03305	0.04616	0.09264	0.000334336		MCD	5	0.09516	0.0326		vs			vs
0.65924	0.01519	0.07329	0.1132	0.28401	0.05568	0.24381	0.06651	0.03656	0.08312		V780A	6	0.12301	0.0613		MCD			F786A
0.14755	0.0961	0.12947	0.03594	0.25327	0.01888	0.04511	0.09981	0.11972	0.13684		V780AMCD	5	0.06257	0.01276
0.47198	0.16527	0.10873	0.01351	0.17505	0.10984	0.01773	0.07545	0.05649	0.06984		F786A	9	0.13519	0.03676		Mann Whitney test			Mann Whitney test
0.42781		0.12376		0.18602	0.04862	0.02411		0.05196	0.26876		F786A MCD	5	0.07019	0.01926		P value	0.0303		P value	0.0079
0.11995		0.14488		0.18248				0.05467	0.14626		L850A	7	0.21034	0.01861		Exact or approximate P value?	Exact		Exact or approximate P value?	Exact
		0.27316									L850A MCD	6	0.06156	0.01254		P value summary	*		P value summary	**
		0.01042									Y852A	7	0.08721	0.02142		Are medians signif. different? (P < 0.05)	Yes		Significantly different (P < 0.05)?	Yes
											Y852AMCD	7	0.1075	0.03291		One- or two-tailed P value?	Two-tailed		One- or two-tailed P value?	Two-tailed
																Sum of ranks in column A,B	59 , 19		Sum of ranks in column A,C	84 , 52
																Mann-Whitney U	4		Mann-Whitney U	7
																L850A			WT
																vs			vs
																L850A MCD			V780A
																Mann Whitney test			Mann Whitney test
																P value	0.0012		P value	0.014
																Exact or approximate P value?	Exact		Exact or approximate P value?	Exact
																P value summary	**		P value summary	*
																Are medians signif. different? (P < 0.05)	Yes		Are medians signif. different? (P < 0.05)	Yes
																One- or two-tailed P value?	Two-tailed		One- or two-tailed P value?	Two-tailed
																Sum of ranks in column E,F	70 , 21		Sum of ranks in column A,G	66 , 25
																Mann-Whitney U	0		Mann-Whitney U	4
																WT			WT
																vs			vs
																Y852A			L850A
																Mann Whitney test			Mann Whitney test
																P value	0.0023		P value	0.2086
																Exact or approximate P value?	Exact		Exact or approximate P value?	Exact
																P value summary	**		P value summary	ns
																Are medians signif. different? (P < 0.05)	Yes		Are medians signif. different? (P < 0.05)	No
																One- or two-tailed P value?	Two-tailed		One- or two-tailed P value?	Two-tailed
																Sum of ranks in column A,I	75 , 30		Sum of ranks in column A,E	63 , 42
																Mann-Whitney U	2		Mann-Whitney U	14
