# Supplementary material for: Mouse TRPA1 function and membrane localization are modulated by direct interactions with cholesterol
Source: eLife. 2019 Jun 11;8:e46084. doi: 10.7554/eLife.46084 (PMC6590989; doi:10.7554/eLife.46084)
Supplement: Source code 1. [file elife-46084-code1.xlsx]

## Sheet: Sript
% Reduce noise in preselected membrane rings.
ImageRGB = imread('filename.tif');
[N,M] = size(ImageRGB);
NormGray = mat2gray(ImageRGB);
Memb = im2bw(NormGray, 0.32);
MembCorrected = Memb;
filling = 1;
while filling < 4 % cycles to draw spots or reduce noise
for i = 2:N-1
for j = 2:M-1
count = 0;
for i1 = (i-1):(i+1)
for j1 = (j-1):(j+1)
if MembCorrected(i1,j1) == 1
count = count + 1;
end
end
end
if (MembCorrected(i,j) == 0) && (count >= 6)
MembCorrected(i,j) = 1;
elseif (MembCorrected(i,j) == 1) && (count <= 4)
MembCorrected(i,j) = 0;
end
end
end
filling = filling + 1;
end
figure
imshow(Memb)
figure
imshow(MembCorrected) % this image is saved and pixel intensity is quantified using ImageJ
